# Supplementary material for: ‘I actually felt like I was a researcher myself.’ On involving children in the analysis of qualitative paediatric research in the Netherlands
Source: PubMed Central journal article supplement (PMC7462149; doi:10.1136/bmjopen-2019-034433), 2020-08-30
Supplement: bmjopen-2019-034433.draft_revisions.pdf [file bmjopen-2019-034433.draft_revisions.pdf]

# BMJ Open

BMJ Open is committed to open peer review. As part of this commitment we make the peer review history of every article we publish publicly available.

When an article is published we post the peer reviewers' comments and the authors' responses online. We also post the versions of the paper that were used during peer review. These are the versions that the peer review comments apply to.

The versions of the paper that follow are the versions that were submitted during the peer review process. They are not the versions of record or the final published versions. They should not be cited or distributed as the published version of this manuscript.

BMJ Open is an open access journal and the full, final, typeset and author-corrected version of record of the manuscript is available on our site with no access controls, subscription charges or pay-per-view fees (<http://bmjopen.bmj.com>).

If you have any questions on BMJ Open's open peer review process please email [info.bmjopen@bmj.com](mailto:info.bmjopen@bmj.com)

# BMJ Open

## **“I actually felt like I was a researcher myself”: Involving Children as Co-Researchers in Analysis of Qualitative Paediatric Research**

|                               |                                                                                                                                                                                                                                                                                                                                             |
|-------------------------------|---------------------------------------------------------------------------------------------------------------------------------------------------------------------------------------------------------------------------------------------------------------------------------------------------------------------------------------------|
| Journal:                      | <i>BMJ Open</i>                                                                                                                                                                                                                                                                                                                             |
| Manuscript ID                 | bmjopen-2019-034433                                                                                                                                                                                                                                                                                                                         |
| Article Type:                 | Original research                                                                                                                                                                                                                                                                                                                           |
| Date Submitted by the Author: | 20-Sep-2019                                                                                                                                                                                                                                                                                                                                 |
| Complete List of Authors:     | Luchtenberg, Malou; University of Groningen; University Medical Center Groningen, Department of Pediatrics<br>Maeckelberghe, Els; University of Groningen, Institute for Medical Education; University Medical Center Groningen<br>Verhagen, Eduard; University of Groningen; University Medical Center Groningen, Department of Pediatrics |
| Keywords:                     | Involvement, Children, PAEDIATRICS, Patient Participation, Biomedical Research, QUALITATIVE RESEARCH                                                                                                                                                                                                                                        |
|                               |                                                                                                                                                                                                                                                                                                                                             |

SCHOLARONE™  
Manuscripts

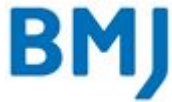

I, the Submitting Author has the right to grant and does grant on behalf of all authors of the Work (as defined in the below author licence), an exclusive licence and/or a non-exclusive licence for contributions from authors who are: i) UK Crown employees; ii) where BMJ has agreed a CC-BY licence shall apply, and/or iii) in accordance with the terms applicable for US Federal Government officers or employees acting as part of their official duties; on a worldwide, perpetual, irrevocable, royalty-free basis to BMJ Publishing Group Ltd ("BMJ") its licensees and where the relevant Journal is co-owned by BMJ to the co-owners of the Journal, to publish the Work in this journal and any other BMJ products and to exploit all rights, as set out in our [licence](#).

The Submitting Author accepts and understands that any supply made under these terms is made by BMJ to the Submitting Author unless you are acting as an employee on behalf of your employer or a postgraduate student of an affiliated institution which is paying any applicable article publishing charge ("APC") for Open Access articles. Where the Submitting Author wishes to make the Work available on an Open Access basis (and intends to pay the relevant APC), the terms of reuse of such Open Access shall be governed by a Creative Commons licence – details of these licences and which [Creative Commons](#) licence will apply to this Work are set out in our licence referred to above.

Other than as permitted in any relevant BMJ Author's Self Archiving Policies, I confirm this Work has not been accepted for publication elsewhere, is not being considered for publication elsewhere and does not duplicate material already published. I confirm all authors consent to publication of this Work and authorise the granting of this licence.

1  
2  
3 **“I actually felt like I was a researcher myself”: Involving Children as Co-**  
4 **Researchers in Analysis of Qualitative Paediatric Research**  
5  
6

7 Luchtenberg ML, Maeckelberghe ELM, Verhagen AAE

8 University of Groningen, University Medical Center Groningen  
9  
10  
11  
12

13 **Corresponding author:**

14 Malou L. Luchtenberg

15 Postbus 30.001, 9700 RB Groningen

16 [m.l.luchtenberg@umcg.nl](mailto:m.l.luchtenberg@umcg.nl), +31 6 25 64 96 59  
17  
18  
19  
20  
21  
22

23 Malou L. Luchtenberg

24 Department of Pediatrics, Beatrix Children's Hospital

25 University of Groningen, University Medical Center Groningen, the Netherlands  
26  
27  
28

29 Els L.M. Maeckelberghe

30 Institute for Medical Education

31 University of Groningen, University Medical Center Groningen, the Netherlands  
32  
33  
34

35 A.A. Eduard Verhagen

36 Department of Pediatrics, Beatrix Children's Hospital

37 University of Groningen, University Medical Center Groningen, the Netherlands  
38  
39  
40

41 Word count: 3882 (excl. title page, abstract, references, tables and quotes)  
42  
43  
44

45 **Keywords:** involvement, children, paediatrics, patient participation, biomedical research,  
46 qualitative research  
47  
48  
49  
50  
51  
52  
53  
54  
55  
56  
57  
58  
59  
60

## ABSTRACT

### Objectives

We aimed to test and reflect on a new approach of involving young children in analysing qualitative research.

### Setting

Research meetings with children at their homes (phase one) or at their primary school (phase two). Phase one consisted of five one-on-one meetings between a child co-researcher and the adult researcher. Together, they watched an interview video to identify themes. The second phase consisted of two group meetings using video fragments from 23 interviews to further explore the identified themes.

### Participants

We involved children of the public as co-researchers to analyse children's interviews about their experiences with taking part in medical research. Our co-researchers were between 10-14 years old. They provided feedback about their experiences.

### Results

All child co-researchers identified themes that they thought were important. The extent to which they needed time and support in structuring varied. The child co-researchers led the discussion about the themes and made the final decision when disagreements occurred. The children rated the time investment as adequate and they valued being a co-researcher as interesting and fun, indicating that they learned new skills and gained knowledge. The experience also caused them to reflect on health and illness in their own lives. The process was relatively time intensive for the adult researchers, but resulted in a more critical assessment of their own work.

### Conclusion

The two-phase approach is promising for actively involving young children in analysing qualitative data. We recommend using videos rather than transcripts to make it easier for children to understand the data and to empathize with the interviewees, and to limit the time investment.

## STRENGTHS AND LIMITATIONS OF THIS STUDY

- This study describes a new two-phase approach to involving children in analysing qualitative interview data by means of individual and group meetings.
- This study explores the use of videos instead of transcripts to present the data to relatively young co-researchers.
- The study reflects on children's involvement as co-researchers both from the perspective of children themselves and from adult researchers.
- In this test phase, we limited the number of young co-researchers and selected interviews from a larger dataset, aiming to include as much variation as possible.

## INTRODUCTION

Paediatric research is important to provide children with the best possible health care. Children are considered vulnerable, raising ethical concerns regarding their ability to give informed consent for research participation.[1] Yet, as stated in the United Nations Convention on the Rights of the Child, they have the right to express their views on everything that is affecting them, and should be provided the opportunity to be heard.[2] Therefore, in a larger as yet unpublished study, we collected experiences of young people on their participation in medical research. When analysing the interviews, we realized that to truly hear our interviewees' voices, the analysis should not be performed solely by adults.

In qualitative research, researchers need to be cautious about interpretation bias in the data analysis. Qualitative research includes a subjective component that makes reflexivity an important aspect of the research.[3] Since children have different life experiences and social situations, their interpretations of their peers' words may differ from adults' interpretations. Therefore, we wanted to involve children in our analysis, but there is little descriptive evidence on how children can be effectively involved in scientific data analysis.[4–11] Other challenges of patient and public involvement (PPI) [12] with children include a lack of funding and time, gatekeeping or power imbalances, and obtaining knowledge and training on how to involve children.[4,7,13–19] Best et al. recently introduced an interesting new method for involving a youth advisory PPI panel in qualitative data analysis: participatory theme elicitation.[20] However, a disadvantage of this method is that it involved data preselection by adults before the young researchers were involved.

We used elements of Best's promising method, but limited preselection. We also considered challenges such as time investment and training. We aimed to design a two-phase approach that would be both effective and efficient. In this paper we reflected on the process from the perspective of children and adults. A content analysis of differences between adult and child researcher interpretations will be published separately.

## METHODS

Children were involved as co-researchers in analysis of interview data conducted in two phases, including five individual meetings in phase one, and two group meetings in phase two.

### Recruitment and sampling

Phase 1

Potential co-researcher participants (9-18 years) were approached through national patient support organizations, primary schools, hospitals, social media, and word-of-mouth. No research experience was required. In this phase, five participants were involved. They attended primary or secondary school and were 10 to 14 years old. None of them had been involved as a co-researcher before.

## Phase 2

Phase two participants were recruited in collaboration with an academic primary school in the Netherlands. In this school, both teachers and pupils are expected to have an academic mindset aimed at research and analysis.[21] We invited one class (15 pupils) of the school's oldest students to participate. Ten pupils age 10 to 12 volunteered. One was unable to participate because of illness.

## Informed consent

### Phase 1

Potential participants received a verbal explanation and an information pack. They were asked to discuss the study with their parents, and to reply through mail or by telephone. Subsequently, we checked if they had understood the information and asked them to reconfirm their participation. Before the session started, the informed consent form was read and discussed with the researcher at the student's home. One parent was present, but did not interfere in the process. All participants, regardless of age, were asked to sign an informed consent form. In accordance with national health law regulations for minors, consent of one of the parents was obtained in addition to the child's consent.[22] Children were also asked to sign a confidentiality agreement regarding any personal information present in the data they analysed. At the end of the session, participants received a €10 voucher as compensation for their time and a certificate acknowledging their involvement as co-researchers.

### Phase 2

Two researchers from the team (PPIA1 and PPIA2) visited the primary school to meet the pupils, teacher, and school head, and to introduce the research project. The primary school director gave her consent for the children to take part during school hours. The potential participants received an information leaflet similar to the phase one participants. They were asked to complete the consent form and the confidentiality agreement at home with a parent if they wanted to take part, and return the form to their schoolteacher. At the end of the group

1  
2  
3 meetings, the participants received a certificate, but were not provided with a voucher since  
4 they participated during school hours.  
5  
6  
7

### 8 **Data characteristics**

9 The data from the original study, consisting of semi-structured, video-taped interviews with  
10 young people between 9 and 18 years old, about their experiences taking part in medical  
11 research were analysed by our co-researchers, the participants in this study. In addition, field  
12 notes were taken during the analyses by the adult researchers, and feedback was obtained from  
13 the participants before, during, and after taking part.  
14  
15  
16  
17  
18  
19

20 The co-researchers received a brief interactive introduction into paediatric research to stimulate  
21 collaboration between the researchers. We purposely did not give them extensive training,  
22 because we did not want them to become ‘little adult researchers.’ Also, extensive training  
23 would have been too time consuming for both the children and the researchers. The introduction  
24 and background information aimed to give the co-researchers an idea of what the data looked  
25 like and what it was about.  
26  
27  
28  
29  
30  
31

32 In the first phase, the co-researchers collaborated with the coordinating researcher (PPIA1) in  
33 a one-on-one session to find main themes in the interviews. They watched a video (25-45  
34 minutes) of another young person and discussed emerging themes with PPIA1. This took place  
35 at the participants’ home and lasted between two and three and a half hours. In the second phase,  
36 two identified themes were further explored in group meetings using video fragments of several  
37 interviews compiled into two short videos that each lasted five minutes. These took place at the  
38 children’s primary school and lasted around two and a half hours.  
39  
40  
41  
42  
43  
44  
45

46 The aim of the analysis process in both phases was to identify the main subjects present in the  
47 video through open, unstructured discussions. To facilitate interaction and discussion, both the  
48 participants and coordinating researcher could pause the video at will. They took notes of what  
49 they thought the interviewee found important. PPIA1 allowed moments of reflection on  
50 personal health and illness experiences, but she was alert regarding potential intertwining of  
51 researchers’ personal experiences with interviewees’ experience. Afterward, the participants  
52 developed strategies to make a mind map (“*a type of diagram with lines and circles for*  
53 *organising information so that it is easier to use or remember*”)[23, p1] in which they showed  
54 how they thought different themes were related to each other. The mind map was designed  
55  
56  
57  
58  
59  
60



using A3 paper, different size sticky notes, and different colour pens. All participants were free to use materials of their own choice. The researcher asked questions about the importance of certain subjects, the identification of an overlapping theme, and the reason why the participant(s) had chosen a certain subject. The participants led the discussion and made the final decision when there was disagreement about topics.

### Data collection and analysis

All meetings were audio taped. The researchers made field notes of how participants fulfilled their role as co-researcher and the way they reflected on this process. Child co-researchers were asked to complete a feedback form about their experiences after the analysis took place (Table 1). In addition, the process was briefly orally evaluated, which was audio taped. All these experiences were collected and thematically analysed.

*Table 1. Feedback questions that were asked of participants.*

|                                                                                                |                                                                                       |
|------------------------------------------------------------------------------------------------|---------------------------------------------------------------------------------------|
| 1. Did you understand beforehand what your role was in the project? (No / a little / yes)      | 6. Would you advise other children to become co-researchers? Why?                     |
| 2. How could we improve the information about working as a co-researcher?                      | 7. How would you consider your time invested? (Too long, adequate, too short)         |
| 3. What was it like for you to work as a co-researcher? (positive things, improvements points) | 8. a. What did you think of the compensation voucher (€10)? (phase one)               |
| 4. Have you learned anything from being a co-researcher? If so, what?                          | b. What did you think about having this project during school hours? Why? (phase two) |
| 5. Would you like to be a co-researcher more often?                                            | 9. Do you have advice on improving this evaluation form?                              |

### Patient and public involvement

This project explored a new approach of involving children in qualitative data analysis for research.

## RESULTS

The results can be subdivided into adult researcher observations during the process itself, and experiences of all co-researchers. The experiences of adult and child co-researchers are summarized in Table 2.

Table 2. Summary of researchers' reflections and observations in involving children in interview analyses

|                                          | Children                                                                                                            | Adults                                                                                                                                           |
|------------------------------------------|---------------------------------------------------------------------------------------------------------------------|--------------------------------------------------------------------------------------------------------------------------------------------------|
| <i>Reasons to participate</i>            | Interesting and fun, something new                                                                                  | Better interpretation of children's voices, test method of involving children in analysis in efficient way, empowerment of children              |
| <i>Time investment</i>                   | Acceptable                                                                                                          | Significant but worthwhile                                                                                                                       |
| <i>Reflection</i>                        | On health and illness of interviewees and their own lives                                                           | On their own work                                                                                                                                |
| <i>Lessons learned</i>                   | New skills; taking notes, collaborating, critical thinking. Knowledge on diseases and experience in doing research. | Every child has something to add, as long as they are given the resources and structure. Children do have different interpretations than adults. |
| <i>Reward (voucher)</i>                  | Appreciated but not important for the younger children (age until 12 years primary school).                         | Important to acknowledge the work children do, to let them know they are part of the team. Reward according to wish of children.                 |
| <i>Participation during school hours</i> | Good because of the variation with schoolwork while keeping free time for themselves.                               | Convenient since children are gathered already which makes it easier to approach them for a group meeting.                                       |
| <i>Advise to peers</i>                   | Do participate!                                                                                                     | Do involve children!                                                                                                                             |

### Observations during the process

Co-researchers' understanding of informed consent procedure  
 The participants in the group meetings were very well able to recall the information they had received a month earlier; they especially remembered the concept of 'doing research about research.' Nonetheless, not all of them were aware of all the details that they and their parents had signed for. Even though the information was especially directed to the children, it was mostly read and signed by their parents at home, and not always discussed with the child. This was different from the co-researchers in the individual meetings. Both the researcher and the parents in the individual meetings were present at that moment and empowered the children to complete the form themselves, while the parents stayed available to help when necessary.

### Co-researchers role development

1  
2  
3 During the analysis process, the videos were paused regularly by the participants or the adult  
4 researcher. During the first few minutes of the individual meetings this was mostly done by the  
5 researcher when she noticed that the participant needed more time to write notes, to discuss  
6 what the participant had written, and to ask how the participant experienced the process so far.  
7  
8 When the adult researcher noticed it was going well, she took a step back to inspire confidence  
9 in the participants, and to stimulate them to take the lead. After a few minutes, the participants  
10 became more confident and a mutual collaboration arose; they took the lead in asking the  
11 researcher questions about her observations. Still, most participants continued to need some  
12 form of structuring support from the main researcher.  
13  
14  
15  
16  
17  
18  
19

20 In the group meetings, role development was different. Given the logistics of being in a big  
21 group with one computer, the adult researcher put the video on pause every now and then. The  
22 participants were free to say 'stop' when they wanted the video to be paused. When the notes  
23 were transformed into the mind map, the facilitators noticed a clear distinction in participants'  
24 role preferences. Some found it hard to summarise their notes to be put on the mind maps, and  
25 brought up a solution by adding some steps in between. Others only needed a bit more time and  
26 space to find their own role.  
27  
28  
29  
30  
31  
32

### 33 Co-researchers' reflections on life and illness

34 The participants empathized with the young people who were sharing their experiences in the  
35 video. They wondered if the young people were still ill and asked if they were alive, hoping  
36 they were all right. They asked questions about the illnesses the young people had, and the  
37 consequences it had on their lives. They also shared experiences from their own lives, for  
38 example about relatives who had cancer or other illnesses. By communicating about illness,  
39 they better understood and identified with each other.  
40  
41  
42  
43  
44  
45  
46

### 47 Co-researchers' interest in main interview study

48 Even though the participants were only involved in the analysis stage of the main interview  
49 study, they were well aware that this was part of a bigger study. They asked about the other  
50 participants and previous experiences with involving children in research analysis, and  
51 wondered whether the interviewees would see their mind maps that resulted from the analysis.  
52 Hearing that they were one of the first children that participated as co-researchers in this project  
53 made them feel special. They expressed the wish to get the project results and hoped we would  
54 do this project again. They also showed interest in why the adult researchers personally did this  
55  
56  
57  
58  
59  
60

1  
2  
3 research project and whether it was part of their university training, showing that the co-  
4 researchers had a broader interest than just fulfilling their role as co-researchers.  
5  
6  
7

### 8 **Co-researchers' experiences**

9

#### 10 Reasons to participate as co-researcher

11 The main reason participants became involved as co-researchers was that they thought it would  
12 be interesting and fun. Interest in research and medicine, earning money, and not having to  
13 work at school were less commonly reported as reasons to take part.  
14  
15  
16

17  
18 *“I thought it could be fun and I had never done such a thing before, and I like to help*  
19 *people, and perhaps I want to become a doctor in the future so I thought it would be*  
20 *fantastic!” (PPI01)*  
21  
22  
23

#### 24 Co-researchers' understanding of the informed consent procedure

25 To improve the information, participants advised us to use fewer difficult words to explain it,  
26 to tell them specifically that they had to take notes of what they thought was important and that  
27 they had to create a mind map. More than half the participants did not have any suggestions for  
28 improving the information they received.  
29  
30  
31  
32

#### 33 Experiences as co-researcher, including advise to other children

34 Participants liked being involved as co-researchers because it was fun and interesting; they were  
35 able to help other children; and they learned a lot themselves.  
36  
37  
38  
39  
40

41 *“It actually felt a bit like I was a researcher myself” (PPI09)*  
42  
43  
44

45 The things they reported learning ranged from obtaining new knowledge about a certain health  
46 condition and experiencing what it is like to be ill, to learning how to do research, how to think  
47 critically, and how to take notes.  
48  
49  
50

51 *“You have to think carefully before you draw conclusions.” (PPI07)*  
52  
53  
54

55 *“A bit about how ill children felt afterwards.” (PPI14)*  
56  
57

58 They all reacted positively to the question whether they wanted to be a co-researcher more  
59 often.  
60

1  
2  
3  
4  
5 *“Yes it was fun, sociable and instructive” (PPI14)*  
6  
7

8 Only one participant mentioned it would depend on whether he had the time to take part. This  
9 participant was the only one who attended secondary school, and consequently had more  
10 homework than other participants. All participants advised others to become a co-researcher,  
11 though one participant acknowledged that it might not suit everyone.  
12  
13  
14  
15

#### 16 Reflection on time investment and reward

17 The meetings took much longer than we expected and described in the information sheets. We  
18 had estimated the meetings to last around two hours; instead the first meeting was three-and-a-  
19 half hours. This was then given special attention, and the next potential participants were  
20 informed and assured that they could pause or stop the meetings at any moment they wanted.  
21 The group meetings lasted as long as was planned, since we had to fit it within school hours.  
22 Most children said the time investment was adequate. One child from the group meetings  
23 mentioned that it would have been better if the meeting was shorter since some children in the  
24 group got distracted, which was also observed by the adult researchers. Another participant  
25 reported he had wanted it last longer because he really liked it and did not want to get back to  
26 his normal schoolwork.  
27  
28  
29  
30  
31  
32  
33  
34  
35

36 The participants appreciated the certificates and vouchers very much. Two of the five phase  
37 one co-researchers specifically mentioned that for them it was not necessary to receive financial  
38 compensation.  
39  
40  
41  
42

#### 43 Taking part during school hours

44 The phase two participants all reported that it was an interesting and nice alternative to the  
45 normal school tasks. They thought it was good to do the project during school time, because  
46 this way they would not miss out on any free time.  
47  
48  
49  
50

51 *“It was fun because you didn’t have to work, and if it hadn’t been during school it was*  
52 *inconvenient” (PPI06)*  
53  
54  
55

#### 56 Reflection of adult researchers

57 Lessons learned  
58  
59  
60

1  
2  
3 The adult researchers learned a lot from involving young children in the analysis because the  
4 participants were very open and direct in their feedback. If they did not understand something,  
5 they directly expressed their struggles; for example when a question was not clearly formulated.  
6  
7 They observed this in both the assertive and the shyer children. The adult researchers were  
8 challenged not to give answers themselves when the participants indicated that they did not  
9 know how to proceed at a certain point in their analysis. It helped the children when the adult  
10 researcher repeated the question they had asked or asked a similar question, without necessarily  
11 directing them, and acknowledged that they were doing the right thing. One of the adult  
12 researchers explained how she experienced the ability of children to interpret findings in many  
13 ways, and not to take one explanation for granted.  
14  
15  
16  
17  
18  
19  
20  
21

22 *“I noticed that as an adult you tend to see things as obvious, for example which*  
23 *subtheme goes with a main theme, while children seem to have multiple other potential*  
24 *interpretations, and they are able to discuss those interpretations.” (PPIA2)*  
25  
26  
27  
28

#### 29 Time investment

30 In preparing the meetings, time was invested in recruitment, developing material to introduce  
31 and explain the procedure, and mostly in thinking about how to best involve children. The time  
32 investment in analysis with co-researchers was time-intensive but necessary for the comparison  
33 of adult and child analysis that will be reported elsewhere. We considered the time investment  
34 reasonable, given the reported empowerment of children, that they learned new skills, and that  
35 views of our data differed from ours, which is promising for better interpretation of our  
36 interviews. Apart from the time investment, there were no great project expenses. Materials  
37 were low cost, and there were minimal travel costs.  
38  
39  
40  
41  
42  
43  
44

#### 45 Personal reflections on children’s involvement

46 Both adult researchers were positively surprised by the co-researchers’ achievements, which  
47 made this project feasible and valuable for our data interpretation as well as personally  
48 rewarding.  
49  
50  
51  
52

53 *“Experiencing how our co-researchers collaborated with us and each other in this*  
54 *research, the reflections they had and empathy they showed did not only empower them,*  
55 *it also made me feel empowered in the work we do.” (PPIA1)*  
56  
57  
58  
59  
60

## DISCUSSION

Little evidence is available on how to involve children in research.[13] We described how relatively young children were involved in research interview analyses using a two-phase approach. Multiple strategies were used to avoid a tokenistic approach, to address challenges regarding time management, and to empower children in the process.

### Two-phase approach

Involving relatively young children (aged 10-14) in our analysis was challenging. We tried to limit preselection of data by adults through one-on-one meetings in which entire interviews were analysed. Since these sessions were relatively long and intensive, it was an advantage that the adult researcher could focus solely on the individual co-researcher for further explanation and facilitation. The themes that were identified were further explored in the second phase through the group meetings. Working with multiple co-researchers in this phase improved the rigor of the qualitative analysis. In addition, there was an unexpected positive result for the co-researchers who were classmates. They strengthened their bond by sharing the research experience and reflecting on health and illness together. This two-phase approach made it possible to achieve our research goals and empower our co-researchers, while limiting the time invested for both adult and child researchers.

### Use of videos in analysis

Our aim was active involvement of our co-researchers in interview analysis in an effective and efficient way. Data analysis in qualitative research is often a long and intensive process with large amounts of text. Locoock et al. reported that reading the transcripts for young people in their study was difficult and inefficient. They concluded that it was more valuable to start a conversation and discuss the data rather than digging into the detailed transcripts.[11] Therefore, we decided to test other ways of involving young co-researchers in the analysis. Visuals such as photographs, drawings, or mapping methods are often used for collaboration with young children to collect data about children's views on, for example, the things they value in their lives.[24] Darbyshire et al. reported that using a variety of qualitative visual techniques was beneficial for getting children interested and engaged in research, and it provided a good way for children to express their views. There is a problem with using visuals as a participatory method rather than in analysis, as Darbyshire et al. pointed out: "...having children take photographs and then having only adults 'interpret' (or possibly misinterpret) them is potentially an adultist approach to research on children that we sought to avoid".[25] Therefore, we used videos in the analysis stage to visualize the interview data that was to be

1  
2  
3 analysed. Our study confirmed the benefits expressed by Darbyshire et al. The co-researchers  
4 liked the creative process when they developed the mind map, and the videos helped them to  
5 understand and empathize with the interviewees. Using the videos instead of transcripts made  
6 it more time efficient, while preserving the effectiveness of a thematic analysis. Reflecting on  
7 this, we realized that using videos rather than transcripts has another benefit regarding rigor of  
8 the qualitative data analyses. Analysis of interview data is often assumed to start at the moment  
9 that the interview has been fully transcribed, but even when this is verbatim, including  
10 descriptions of vocal emotions such as laughter, there will always be a loss of key elements  
11 such as volume of voices and facial expressions. This could present interviewees' experiences  
12 in a more abstract way than the original data show.[26,27] In other words, by using videos, we  
13 might have started the analysis with a more authentic representation of our data.  
14  
15  
16  
17  
18  
19  
20  
21  
22  
23

### 24 **Additional considerations and further research**

25 Time investment for both adults and children is an important challenge for developing ways of  
26 involving children in research analysis. The method developed by Best et al. limited the analysis  
27 to two hours. Nevertheless, an additional time investment of four times 90-120 minutes was  
28 asked from participants for 'capacity building.' In these sessions, young people learned how to  
29 design and conduct a study, how to perform qualitative data analysis, and received an  
30 introduction into the subject of their data.[20] As described, we purposely did not train our co-  
31 researchers, both to avoid 'fitting' them into our own idea of what a qualitative researcher  
32 should be, and to limit time investment. Though we cannot make a comparison, the minimal  
33 training we provided to our co-researchers did not seem to have a negative impact on the result.  
34  
35  
36  
37  
38  
39  
40  
41

42 In addition to time investment, timing of research meetings should be considered. Many Young  
43 People's Advisory Groups (YPAGs) plan their meetings mostly during school holidays or on  
44 weekends.[28] INVOLVE identified parents and schools as a significant barriers to public  
45 involvement during school hours: "...lack of schools' recognition of the value of their work  
46 sometimes acts as a barrier to them attending events which involve travel in school hours." [15,  
47 p12] Nevertheless, we managed to set up a collaboration with a primary school for the second  
48 phase of our study, and planned the group meetings during school hours. The school director  
49 recognized the value of the research being carried out with children at school, perhaps because  
50 it is an academic primary school. The school director reported that the school is frequently  
51 approached for research projects throughout the school year, and it was therefore impossible  
52 not to do some gatekeeping. We were happy that the school valued our project and made an  
53  
54  
55  
56  
57  
58  
59  
60



1  
2  
3 exception for us. For our co-researchers in the group meetings, participation during school time  
4 was a great way to be involved, since they reported they had busy schedules in their free time.  
5 One of our co-researchers said that being busy with homework for secondary school might be  
6 a reason not to participate in similar project in the future.  
7  
8  
9

10  
11 We recently started testing our two-phase approach with young people age 16 to 18, who will  
12 use this project for a school assignment, thereby creating a win-win situation. If this proves  
13 beneficial, we will consider starting a long-term collaboration with both primary schools and  
14 secondary schools to optimize collaboration between researchers and children, which could be  
15 beneficial for both individual researchers and the schools involved. We expect that a  
16 comparison of findings between adults, children, and young people will bring interesting new  
17 insights from different life experiences and ages of the researchers involved.  
18  
19  
20  
21  
22  
23  
24

### 25 **Study limitations**

26 To test this new approach, we started with a small group of young co-researchers. A  
27 consequence is that we had to make a preselection of interviews from a larger dataset. Within  
28 this selection we aimed to have as much variation as possible, but we had to consider pragmatic  
29 matters as well, such as the length of the interviews. In addition, in our method children were  
30 not involved in making choices about specific quotes used in the results sections.  
31  
32  
33  
34  
35

### 36 **CONCLUSION**

37 Based on our study, we suggest that the two-phase approach provides an effective and efficient  
38 way to involve relatively young children in analysis of qualitative data by combining one-on-  
39 one meetings and group meetings. Presenting the interview data through videos rather than  
40 transcripts made it easier for children to understand the data, to empathize with the  
41 interviewees, and to limit time investment. The two-phase approach has the potential to prevent  
42 unrealistic interpretation of children's voices by adult researchers because it limits preselection  
43 of data by adults. Additional benefits are that children reflect on health and illness in their own  
44 lives, and they are empowered and engaged in medical research.  
45  
46  
47  
48  
49  
50  
51  
52

### 53 **ETHICS APPROVAL**

54 Both this study (M18.2334032 2018, July 24<sup>th</sup>) and our larger study (M16.192386 2016, May  
55 10<sup>th</sup>) were concluded not to fall within the scope of the Medical Research Involving Human  
56 Subjects Act by the Medical Ethics Review Board of the University Medical Center Groningen.  
57  
58

### 59 **ACKNOWLEDGEMENTS**

1  
2  
3 We want to thank all participants in the original interview study, as well as our co-researcher  
4 participants from this project. Thanks to Laura Postma for co-facilitating the group meetings.  
5

#### 6 **FUNDING STATEMENT**

7 This PPI study itself had low costs. Data collection for the main interview study was funded by the  
8 University of Groningen as part of the MD/PhD program of Malou Luchtenberg. This funding body has  
9 no role in the design of the study and collection, analysis, or interpretation of data, or in writing the  
10 manuscript.  
11  
12

#### 13 **COMPETING INTERESTS STATEMENT**

14 None declared.  
15  
16

#### 17 **DATA SHARING STATEMENT**

18 The original dataset with audio- and videotaped interviews is not available for the public due  
19 to privacy concerns.  
20  
21

#### 22 **AUTHOR'S CONTRIBUTION**

23 ML, EM and EV designed the original study. ML was responsible for the data collection in  
24 phase one, and the group meetings were led by ML and LP. ML made the first draft of the  
25 article, which was discussed regularly within the team and reviewed by EM and EV. All authors  
26 read and approved the final manuscript.  
27  
28  
29  
30  
31  
32  
33  
34  
35  
36  
37  
38  
39  
40  
41  
42  
43  
44  
45  
46  
47  
48  
49  
50  
51  
52  
53  
54  
55  
56  
57  
58  
59  
60

## REFERENCES

1. World Medical Association. World Medical Association Declaration of Helsinki: ethical principles for medical research involving human subjects. *JAMA* 2013;310(20):2191–4. <https://doi.org/10.1001/jama.2013.281053>
2. U. N. General Assembly. Convention on the Rights of the Child, 20 November 1989. *Annu Rev Popul Law* 1989;16(September):501.
3. Hennink M, Hutter I, Bailey A. *Qualitative Research Methods*. London: Sage 2011.
4. Taylor RM, Whelan JS, Gibson F, et al. Involving young people in BRIGHTLIGHT from study inception to secondary data analysis: insights from 10 years of user involvement. *Res Involv Engagem* 2018;4(1):1–14. <https://doi.org/10.1186/s40900-018-0135-x>
5. Jamal F, Langford R, Daniels P, et al. Consulting with young people to inform systematic reviews: an example from a review on the effects of schools on health. *Heal Expect* 2015;18(6):3225–35. <https://doi.org/10.1111/hex.12312>
6. Coad J, Evans R. Reflections on practical approaches to involving children and young people in the data analysis process. *Child Soc* 2008 Jan;22(1):41–52. <https://doi.org/10.1111/j.1099-0860.2006.00062.x>
7. Clavering EK, McLaughlin J. Children’s participation in health research: from objects to agents? *Child Care Health Dev* 2010;36(5):603–11. <https://doi.org/10.1111/j.1365-2214.2010.01094.x>
8. Brady L-M, Preston J. Evaluating the extent and impact of young people’s involvement in National Institute for Health Research (NIHR) studies: an assessment of feasibility. 2017 April. [http://www.invo.org.uk/wp-content/uploads/2017/06/Impact-of-CYPs-involvement\\_JLI\\_GenR.pdf](http://www.invo.org.uk/wp-content/uploads/2017/06/Impact-of-CYPs-involvement_JLI_GenR.pdf) (accessed 01-07-2019)
9. Lundy L, McEvoy L, Byrne B. Working with young children as co-researchers: an approach informed by the United Nations Convention on the Rights of the Child. *Early Educ Dev* 2011;22(5):714–36. <https://doi.org/10.1080/10409289.2011.596463>
10. Holland S, Renold E, Ross NJ, et al. Power, agency and participatory agendas: a critical exploration of young people’s engagement in participative qualitative research. *Childhood* 2010;17(3):360–75. <https://doi.org/10.1177/0907568210369310>
11. Locock L, Kirkpatrick S, Brading L, et al. Involving service users in the qualitative analysis of patient narratives to support healthcare quality improvement. *Res Involv Engagem* 2019;5(1):1–11. <https://doi.org/10.1186/s40900-018-0133-z>
12. INVOLVE. What is public involvement in research? *NHS Natl Inst Heal Res* 2015. <http://www.invo.org.uk/find-out-more/what-is-public-involvement-in-research-2/> (accessed 10-07-2019)
13. Bird D, Culley L, Lakanpaul M. Why collaborate with children in health research: an analysis of the risks and benefits of collaboration with children. *Arch Dis Child - Educ Pract Ed* 2013;98(2):42–8. <https://doi.org/10.1136/archdischild-2012-303470>
14. Preston J, Stones SR, Davies H, et al. How to involve children and young people in what is, after all, their research. *Arch Dis Child* 2019;104(5):494–500. <https://doi.org/10.1136/archdischild-2018-315118>
15. Sonpal K, Walker E, Swallow V, et al. Report on involving children and young people in research. Southampton: INVOLVE. 2019. <https://www.invo.org.uk/wp-content/uploads/2019/06/77620-YPv3-Booklet-WEB.pdf> (accessed 01-07-2019)
16. Blackburn S, McLachlan S, Jowett S, et al. The extent, quality and impact of patient and public involvement in primary care research: a mixed methods study. *Res Involv Engagem* 2018;4(1):1–18. <https://doi.org/10.1186/s40900-018-0100-8>

17. Domecq JP, Prutsky G, Elraiyah T, et al. Patient engagement in research: a systematic review. *BMC Heal Serv Res* 2014;14(89):1–9. <https://doi.org/10.1186/1472-6963-14-89>
18. Kellett M, Forrest R, Dent N, et al. “Just teach us the skills please, we’ll do the rest”: Empowering ten-year-olds as active researchers. *Child Soc* 2004;18(5):329–43. <https://doi.org/10.1002/chi.807>
19. Chappell P, Rule P, Dlamini M, et al. Troubling power dynamics: youth with disabilities as co-researchers in sexuality research in South Africa. *Childhood* 2014;21(3):385–99. <https://doi.org/10.1177/0907568214525427>
20. Best P, Badham J, Corepal R, et al. Network methods to support user involvement in qualitative data analyses: an introduction to Participatory Theme Elicitation. *Trials* 2017;18(1):1–14. <https://doi.org/10.1186/s13063-017-2289-5>
21. Brederoschool. Academische Basisschool 2019. Groningen, the Netherlands. <https://brederoschool.openbaaronderwijsgroningen.nl/academischebasisschool/index.html> (accessed 09-11-2018)
22. Dutch Medical Research Involving Human Subjects Act (WMO), 26 February 1998. <https://wetten.overheid.nl/BWBR0009408/2019-04-02> (accessed 09-04-2019)
23. Cambridge University Press. Meaning of mind map in English. Cambridge Dictionary. 2019. <https://dictionary.cambridge.org/dictionary/english/mind-map> (accessed 19-09-2019)
24. Coad J. Using art-based techniques in engaging children and young people in health care consultations and/or research. *J Res Nurs* 2007;12(5):487–97. <https://doi.org/10.1177/1744987107081250>
25. Darbyshire P, Macdougall C, Schiller W. Multiple methods in qualitative research with children: more insight or just more? *Qual Res* 2005;5(4):417–436. <https://doi.org/10.1177/1468794105056921>
26. Hewitt J. Ethical components of researcher-researched relationships in qualitative interviewing. *Qual Health Res* 2007;17(8):1149–59. <https://doi.org/10.1177/1049732307308305>
27. Alldred P, Gillies V. Eliciting research accounts: re/producing modern subjects. *Ethics in Qualitative Research*. London: Sage 2002:146–65.
28. Gaillard S, Malik S, Preston J, et al. Involving children and young people in clinical research through the forum of a European Young Persons’ Advisory Group: needs and challenges. *Fundam Clin Pharmacol* 2018 Aug;32(4):357–62. <https://doi.org/10.1111/fcp.12360>

# CERTIFICATE OF ENGLISH EDITING

This document certifies that the paper listed below has been edited to ensure that the language is clear and free of errors. The logical presentation of ideas and the structure of the paper were also checked during the editing process. The edit was performed by professional editors at Editage, a division of Cactus Communications. The intent of the author's message was not altered in any way during the editing process. The quality of the edit has been guaranteed, with the assumption that our suggested changes have been accepted and have not been further altered without the knowledge of our editors.

## TITLE OF THE PAPER

"I actually felt like I was a researcher myself": Involving Children as Co-Researchers in Analysis of Qualitative Paediatric Research

## AUTHORS

Malou L. Luchtenberg

## JOB CODE

ALCHT\_1

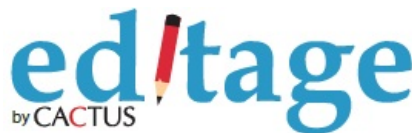

Signature

*Vikas Narang*

Vikas Narang,  
Senior Vice President,  
Operations-Author Services, Editage

Date of Issue  
**September 16, 2019**

Editage, a brand of Cactus Communications, offers professional English language editing and publication support services to authors engaged in over 500 areas of research. Through its community of experienced editors, which includes doctors, engineers, published scientists, and researchers with peer review experience, Editage has successfully helped authors get published in internationally reputed journals. Authors who work with Editage are guaranteed excellent language quality and timely delivery.

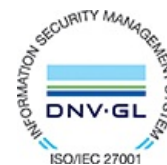

**CACTUS**

### Contact Editage

Worldwide  
request@editage.com  
+1 877-334-8243  
www.editage.com

Japan  
submissions@editage.com  
+81 03-6868-3348  
www.editage.jp

Korea  
submit-  
korea@editage.com  
1544-9241  
www.editage.co.kr

China  
fabiao@editage.cn  
400-005-6055  
www.editage.cn

Brazil  
contato@editage.com  
0800-892-20-97  
www.editage.com.br

Taiwan  
submitjobs@editage.com  
02 2657 0306  
www.editage.com.tw

# BMJ Open

## "I actually felt like I was a researcher myself": Involving Children as Co-Researchers in Analysis of Qualitative Paediatric Research

|                                 |                                                                                                                                                                                                                                                                                                                                             |
|---------------------------------|---------------------------------------------------------------------------------------------------------------------------------------------------------------------------------------------------------------------------------------------------------------------------------------------------------------------------------------------|
| Journal:                        | <i>BMJ Open</i>                                                                                                                                                                                                                                                                                                                             |
| Manuscript ID                   | bmjopen-2019-034433.R1                                                                                                                                                                                                                                                                                                                      |
| Article Type:                   | Original research                                                                                                                                                                                                                                                                                                                           |
| Date Submitted by the Author:   | 22-Jan-2020                                                                                                                                                                                                                                                                                                                                 |
| Complete List of Authors:       | Luchtenberg, Malou; University of Groningen; University Medical Center Groningen, Department of Pediatrics<br>Maeckelberghe, Els; University of Groningen, Institute for Medical Education; University Medical Center Groningen<br>Verhagen, Eduard; University of Groningen; University Medical Center Groningen, Department of Pediatrics |
| <b>Primary Subject Heading</b>: | Paediatrics                                                                                                                                                                                                                                                                                                                                 |
| Secondary Subject Heading:      | Ethics, Qualitative research, Research methods                                                                                                                                                                                                                                                                                              |
| Keywords:                       | Involvement, Children, PAEDIATRICS, Patient Participation, Biomedical Research, QUALITATIVE RESEARCH                                                                                                                                                                                                                                        |
|                                 |                                                                                                                                                                                                                                                                                                                                             |

SCHOLARONE™  
Manuscripts



I, the Submitting Author has the right to grant and does grant on behalf of all authors of the Work (as defined in the below author licence), an exclusive licence and/or a non-exclusive licence for contributions from authors who are: i) UK Crown employees; ii) where BMJ has agreed a CC-BY licence shall apply, and/or iii) in accordance with the terms applicable for US Federal Government officers or employees acting as part of their official duties; on a worldwide, perpetual, irrevocable, royalty-free basis to BMJ Publishing Group Ltd ("BMJ") its licensees and where the relevant Journal is co-owned by BMJ to the co-owners of the Journal, to publish the Work in this journal and any other BMJ products and to exploit all rights, as set out in our [licence](#).

The Submitting Author accepts and understands that any supply made under these terms is made by BMJ to the Submitting Author unless you are acting as an employee on behalf of your employer or a postgraduate student of an affiliated institution which is paying any applicable article publishing charge ("APC") for Open Access articles. Where the Submitting Author wishes to make the Work available on an Open Access basis (and intends to pay the relevant APC), the terms of reuse of such Open Access shall be governed by a Creative Commons licence – details of these licences and which [Creative Commons](#) licence will apply to this Work are set out in our licence referred to above.

Other than as permitted in any relevant BMJ Author's Self Archiving Policies, I confirm this Work has not been accepted for publication elsewhere, is not being considered for publication elsewhere and does not duplicate material already published. I confirm all authors consent to publication of this Work and authorise the granting of this licence.

1  
2  
3 **“I actually felt like I was a researcher myself”: Involving Children as Co-**  
4 **Researchers in Analysis of Qualitative Paediatric Research**  
5  
6

7 Malou Luchtenber, Els Maeckelberghe, Eduard Verhagen  
8 University of Groningen, University Medical Center Groningen  
9

10  
11  
12  
13 **Corresponding author:**

14 Malou L. Luchtenberg  
15  
16 Postbus 30.001, 9700 RB Groningen  
17 [m.l.luchtenberg@umcg.nl](mailto:m.l.luchtenberg@umcg.nl), +31 6 25 64 96 59  
18  
19

20  
21  
22 Malou L. Luchtenberg  
23 Department of Pediatrics, Beatrix Children’s Hospital  
24 University of Groningen, University Medical Center Groningen, the Netherlands  
25  
26

27  
28 Els L.M. Maeckelberghe  
29 Institute for Medical Education  
30 University of Groningen, University Medical Center Groningen, the Netherlands  
31  
32

33  
34  
35 A.A. Eduard Verhagen  
36 Department of Pediatrics, Beatrix Children’s Hospital  
37 University of Groningen, University Medical Center Groningen, the Netherlands  
38  
39

40  
41 Word count: 3882 (excl. title page, abstract, references, tables and quotes)  
42  
43

44 **Keywords:** involvement, children, paediatrics, patient participation, biomedical research,  
45 qualitative research  
46  
47  
48  
49  
50  
51  
52  
53  
54  
55  
56  
57  
58  
59  
60



## ABSTRACT

### Objectives

We aimed to test and reflect on a new approach of involving young children in analysing qualitative research.

### Setting

Single-centre study in the Netherlands including research meetings with children at their homes (phase one) or at their school (phase two). Phase one consisted of five one-on-one meetings between a child co-researcher and the adult researcher to identify themes from a video interview. Phase two consisted of two group meetings to further explore the identified themes using fragments from 23 interviews.

### Participants

We involved children (aged 10-14) of the public as co-researchers to analyse children's interviews about their experiences with taking part in medical research. They provided feedback about their experiences.

### Results

All child co-researchers identified themes that they thought were important. The extent to which they needed time and support in structuring varied. The children themselves rated the time investment as adequate and they valued being a co-researcher as interesting and fun, indicating that they learned new skills and gained knowledge. The experience also caused them to reflect on health and illness in their own lives. The process was relatively time intensive for the adult researchers, but resulted in a more critical assessment of their own work.

### Conclusion

The two-phase approach is promising for actively involving young children in analysing qualitative data. It has the potential to prevent unrealistic interpretation of children's voices by adult researchers because it limits preselection of data by adults. We recommend using videos rather than transcripts to make it easier for children to understand the data and to empathize with the interviewees, and to limit the time investment.

## STRENGTHS AND LIMITATIONS OF THIS STUDY

- This study describes a new two-phase approach to involving children in analysing qualitative interview data by means of individual and group meetings.
- This study explores the use of videos instead of transcripts to present the data to relatively young co-researchers.
- The study reflects on children's involvement as co-researchers both from the perspective of children themselves and from adult researchers.
- In this test phase, we limited the number of young co-researchers and selected interviews from a larger dataset, aiming to include as much variation as possible.

## INTRODUCTION

Paediatric research is important to provide children with the best possible evidence based health care. Children are considered vulnerable, raising ethical concerns regarding their ability to give informed consent for research participation.[1] This results in reluctance to invite children. Therefore, in a larger as yet unpublished study, we collected experiences of young people on their participation in medical research to provide recommendations for improvement of children's participation in research. In order to truly hear the interviewees' voices, we must take them seriously, and children should be involved in the analysis.

In qualitative studies, researchers need to be cautious about interpretation bias in the data analysis. Qualitative research includes a subjective component that makes reflexivity important.[2] Since children have different life experiences and social situations, their interpretations of their peers' words may differ from adults' interpretations. Therefore, we wanted to involve children in our analysis to strengthen our analysis, but there is little descriptive evidence on how children can be effectively involved in scientific data analysis.[3–10] Other challenges of patient and public involvement (PPI) [11] with children include a lack of funding and time, gatekeeping or power imbalances, and obtaining knowledge and training on how to involve children.[3,6,12–18] Best et al. recently introduced an interesting new method for involving a youth advisory PPI panel in qualitative data analysis: participatory theme elicitation.[19] However, a disadvantage of this method is that it involved data preselection by adults before the young researchers were involved.

We used elements of Best's promising method, but limited preselection. We also considered challenges such as time investment and training. Therefore, we designed a two-phase approach that would be both effective, i.e. hearing children's true voices, and efficient, i.e. limiting time investment. In this paper we reflect on how we involved children in data analysis, and what we learned from this process from the perspective of children and adults. Measuring the impact of a PPI process in terms of the content is another great challenge in this field of research.[20] This will be evaluated and published separately.

## METHODS

This is a single-centre study conducted at the University Medical Center Groningen, the Netherlands. Children were involved as co-researchers in analysis of interview data conducted in two phases, including five individual meetings in phase one, and two group meetings in phase

1  
2  
3 two. This was an exploratory study.  
4  
5

## 6 **Recruitment and sampling**

### 7 Phase 1

8  
9 Potential co-researcher participants were approached through national patient support  
10 organizations, primary schools, hospitals, social media, and word-of-mouth. No research  
11 experience was required. Sampling was based on age (9-18 years) and language (fluency in  
12 Dutch). Though recruitment was challenging, we reached our goal of five participants in this  
13 first phase.  
14  
15  
16  
17  
18

### 19 Phase 2

20  
21 Phase two participants were recruited in collaboration with a local academic primary school in  
22 Groningen, the Netherlands, where teachers and pupils are expected to have an academic mind-  
23 set aimed at research and analysis.[21] We invited one class (15 pupils) of the school's oldest  
24 students to participate. Ten pupils volunteered, one was unable to participate because of illness.  
25  
26  
27  
28  
29

## 30 **Informed consent**

### 31 Phase 1

32  
33 Potential participants received verbal and written information. They were asked to discuss the  
34 study with their parents, and to reply through mail or by telephone. Before the session started,  
35 the informed consent form was read and discussed with the researcher at the child's home. One  
36 parent was present, but did not interfere in the process. All children (regardless of age) were  
37 asked to sign informed consent to acknowledge their unique and equally valued contribution.  
38 In accordance with the Dutch Medical Research Involving Human Subjects Act (WMO),  
39 parental consent was obtained in addition to the child's consent.[22] Children were also asked  
40 to sign a confidentiality agreement regarding any personal information present in the data they  
41 analysed. At the end of the session, participants received a €10 voucher as compensation for  
42 their time and a certificate acknowledging their contribution as co-researchers.  
43  
44  
45  
46  
47  
48  
49  
50

### 51 Phase 2

52  
53 Two adult researchers visited the primary school to meet the pupils, teacher, and headmaster,  
54 and to introduce the research project. The headmaster gave consent for the children to  
55 participate during school hours. Potential participants received an information leaflet similar  
56 to the phase one participants. They were asked to complete the consent form and the  
57  
58  
59  
60

confidentiality agreement at home with a parent, and return the form to their schoolteacher. At the end of the group meetings, the participants received a certificate, but were not provided with a voucher since they participated during school hours.

### Data characteristics

The data from the original study were analysed by our co-researchers. In addition, field notes were taken during the analyses by the adult researchers, and feedback was obtained from the participants before, during, and after participating. Figure 1 provides an overview of the data presented in this study. Study 1 represents the original qualitative interview study. Study 2 refers to the two-phase project in which children collaborated with adult researchers as co-researchers in analysing the data of study 1. Study 3 is the study reported on in this paper. Table 1 provides more information on the data collected for the original study.

*Table 1. Details of data of the larger interview study on children's experiences in research*

|                                  |                                                                                                                                                                                                                                                                                                                                                                                                                                                                                                                                                                                 |
|----------------------------------|---------------------------------------------------------------------------------------------------------------------------------------------------------------------------------------------------------------------------------------------------------------------------------------------------------------------------------------------------------------------------------------------------------------------------------------------------------------------------------------------------------------------------------------------------------------------------------|
| <b>Study characteristics</b>     |                                                                                                                                                                                                                                                                                                                                                                                                                                                                                                                                                                                 |
| <b>Aim</b>                       | To explore children's experiences in medical research to provide recommendation from their own perspectives on how to improve their involvement in research.                                                                                                                                                                                                                                                                                                                                                                                                                    |
| <b>Setting and research team</b> | Single-centre study performed by research team at the University Medical Center Groningen, the Netherlands. The research team consisted of an ethicist (EM), paediatrician (EV), and MD/PhD student (ML). All members are trained and/or have experience in qualitative research.                                                                                                                                                                                                                                                                                               |
| <b>Recruitment and sampling</b>  | Recruitment through health providers from multiple hospitals, national patient support groups, social media, and word-of-mouth. Purposive maximum variation sample: children 9-18 years old who were invited to participate in different types of medical research in the Netherlands (and took part or declined to take part), both patients and healthy volunteers. Participants had no prior relationship with the research team.                                                                                                                                            |
| <b>Informed consent</b>          | Informed consent from a parent and child, or child only (from 16 years on) according to Dutch law regulations.                                                                                                                                                                                                                                                                                                                                                                                                                                                                  |
| <b>Data collection</b>           | 23 Semi-structured in-depth interviews (lasting between 30-100 min) with children about their experiences with taking part in research, including advices for improvement of their involvement in informed consent procedure and the research itself. A topic guide was developed based on a previous study in the UK. Interviews performed by ML took place at children's homes and were audio or video taped, transcribed verbatim, and returned to the participants (no comments from participants were received). Data collection lasted until data saturation was reached. |
| <b>Ethics approval</b>           | This study (M16.192386 2016, May 10 <sup>th</sup> ) was concluded not to fall within the scope of the Medical Research Involving Human Subjects Act (WMO) by the Medical Ethics Review Board of the University Medical Center Groningen.                                                                                                                                                                                                                                                                                                                                        |

The co-researchers received a brief interactive introduction into paediatric research and study 1. They were not given extensive training, to avoid them to become 'little adult researchers'. Furthermore, extensive training would have been time consuming for both the children and the researchers.

1  
2  
3  
4  
5 In phase 1, the co-researchers collaborated with the coordinating researcher (PPIA1 – PPI adult  
6 researcher 1) in a one-on-one session to find main themes in the interviews of study 1. They  
7 watched a video (25-45 minutes) of another young person and discussed emerging themes. This  
8 took place at the participants' home and lasted between two and three and a half hours. In the  
9 second phase, two identified themes were further explored in group meetings using video  
10 fragments of several interviews compiled into two short videos that each lasted five minutes.  
11 These group meetings took place at one local primary school and lasted around two and a half  
12 hours.  
13  
14  
15  
16  
17  
18  
19

20 The aim of the analysis process in both phases was to identify the main topics in the video  
21 through open, unstructured discussions. To facilitate interaction and discussion, both  
22 participants and coordinating researcher could pause the video at will. They took notes of what  
23 they thought the interviewee found important. PPIA1 allowed moments of personal reflection,  
24 but she was alert regarding potential intertwining of researchers' personal experiences with  
25 interviewees' experiences. Afterward, the participants created a mind map (*"a type of diagram*  
26 *with lines and circles for organising information so that it is easier to use or remember"*)[23,  
27 p1] depicting their interpretation of the interrelatedness of different themes. The mind map was  
28 designed using A3 paper, different sizes of sticky notes, and colour pens. All participants were  
29 free to use materials of their own choice. The researcher asked questions about the importance  
30 of certain subjects, the identification of an overlapping theme, and the reason why the  
31 participant(s) had chosen a certain subject. The participants led the discussion and made the  
32 final decision when there was disagreement about topics.  
33  
34  
35  
36  
37  
38  
39  
40  
41  
42  
43  
44

### 45 **Data collection and analysis**

46 Before the project started, child co-researchers were asked why they wanted to take part. The  
47 adult researchers made field notes of how participants fulfilled their role as co-researcher, and  
48 how the participants reflected on this process. Child co-researchers completed a feedback form  
49 after the analysis (Table 2). In addition, the process was briefly orally evaluated. All meetings  
50 were audio taped.  
51  
52  
53

54 The analysis was done by PPIA1 (ML) using a framework approach,[24] and discussed with  
55 EM (individual meetings) and PPIA2 (group meetings). Some themes, such as time investment,  
56 were identified in advance from literature, others were derived from the data. Regular updates  
57  
58  
59  
60

were given to the research team, and any disagreements were discussed. As this exploratory study had a relatively small sample size, we did not aim for data saturation.

*Table 2. Feedback form*

|                                                                                                         |                                                                                                                                                                  |
|---------------------------------------------------------------------------------------------------------|------------------------------------------------------------------------------------------------------------------------------------------------------------------|
| 1. Did you understand beforehand what your role was in the project? (No / a little / yes)               | 6. Would you advise other children to become co-researchers? Why?                                                                                                |
| 2. How could we improve the information about working as a co-researcher?                               | 7. How would you consider your time invested? (Too long, adequate, too short)                                                                                    |
| 3. What was it like for you to work as a co-researcher?<br>a. positive things<br>b. improvements points | 8. a. What did you think of the compensation voucher (€10)? (phase one)<br>b. What did you think about having this project during school hours? Why? (phase two) |
| 4. Have you learned anything from being a co-researcher? If so, what?                                   | 9. Do you have advice on improving this evaluation form?                                                                                                         |
| 5. Would you like to be a co-researcher more often?                                                     |                                                                                                                                                                  |

### **Patient and public involvement**

This project explored a new approach of involving children in qualitative data analysis for research.

## **RESULTS**

### **Participant characteristics**

In total, fourteen children, eight girls and six boys, participated as co-researchers in this study. Two participants had experience being a chronic patient. None of them had been a co-researcher before. Table 3 and 4 show characteristics of child and adult participants, respectively.

*Table 3. Child participants characteristics*

| <b>Characteristics child co-researchers</b>           | <b>N* (%)**</b> |
|-------------------------------------------------------|-----------------|
| <i>Sex</i>                                            |                 |
| Girl                                                  | 8 (57)          |
| Boy                                                   | 6 (43)          |
| <i>Age</i>                                            |                 |
| 10 years                                              | 1 (7)           |
| 11 years                                              | 10 (71)         |
| 12 years                                              | 2 (14)          |
| 13 years                                              | 0 (0)           |
| 14 years                                              | 1 (7)           |
| <i>School attending</i>                               |                 |
| Primary School                                        | 13 (93)         |
| Secondary School                                      | 1 (7)           |
| <i>Hospital/Disease experience (lived experience)</i> |                 |
| Currently having a disease                            | 2 (14)          |
| Hospitalization or small surgery in the past          | 6 (43)          |
| Having family members that have a disease             | 2 (14)          |
| None                                                  | 4 (29)          |

|                                           |  |          |
|-------------------------------------------|--|----------|
| <i>Research experience as participant</i> |  |          |
| Yes                                       |  | 2 (14)   |
| No                                        |  | 12 (86)  |
| <i>Experience as co-researcher</i>        |  |          |
| Yes                                       |  | 0 (0)    |
| No                                        |  | 14 (100) |

\* Number of child participants; total N = 14

\*\* Rounded to nearest whole number

*Table 4. Adult participants characteristics*

| Participant | Age | Sex | Experience illness /hospital                                  | Research experience (participation in research)                     | Research experience (performing research)                       |
|-------------|-----|-----|---------------------------------------------------------------|---------------------------------------------------------------------|-----------------------------------------------------------------|
| PPIA1       | 27  | F   | As a medical student. Graduated as medical doctor (Aug 2019). | Yes, participating in two big cohort studies for several years now. | Training and experience in qualitative research during PhD.     |
| PPIA2       | 23  | F   | As a medical student. Started internships half a year ago.    | No experience in research participation.                            | Trained in qualitative research as a former psychology student. |

### Reflection and evaluation of the involvement process

The results can be divided into 5 themes: (1) understanding of study procedures, (2) empowerment, (3) reflection on health and illness, (4) interest in the bigger picture, and (5) reflection on time investment. The results of the feedback form are summarized in Table 5.

*Table 5. Summary of feedback*

| Question                                                                                                | Summary of answers (number of responses)*                                                                                                                                                                                                                                                 |
|---------------------------------------------------------------------------------------------------------|-------------------------------------------------------------------------------------------------------------------------------------------------------------------------------------------------------------------------------------------------------------------------------------------|
| 1. Did you understand beforehand what your role was in the project? (No / a little / yes)               | No (0)<br>A little (12)<br>Yes (2)                                                                                                                                                                                                                                                        |
| 2. How could we improve the information about working as a co-researcher?                               | Don't know (4)<br>Everything was clear (5)<br>Using less difficult words (4)<br>Saying that we are going to take notes and create a mind map (1)                                                                                                                                          |
| 3. What was it like for you to work as a co-researcher?<br>a. positive things<br>b. improvements points | a. Fun (14), interesting (4), helping other children (1), you learn yourself (1), time investment was okay (2), receiving a certificate (1)<br>b. no improvement points (12), shorter interviews (1), working an entire school day (instead of a half one) (1)                            |
| 4. Have you learned anything from being a co-researcher? If so, what?                                   | Taking notes (2)<br>Critical thinking and listening (4)<br>About a medical condition (2)<br>About doing research (2)<br>About how children think and feel about research (2)<br>That children think different from adults (1)<br>That it is fun and you learn a lot (1)<br>Not really (1) |

|                                                                                                                                                                  |                                                                                                                                                                                                                                                                         |
|------------------------------------------------------------------------------------------------------------------------------------------------------------------|-------------------------------------------------------------------------------------------------------------------------------------------------------------------------------------------------------------------------------------------------------------------------|
| 5. Would you like to be a co-researcher more often?                                                                                                              | Yes, because it's fun (12)<br>Yes, because it's interesting (5)<br>Yes, because I like to help people (1)<br>Yes, I know what to expect now (1)<br>Yes, if it doesn't hurt (1)<br>It is fun but depends on the time I have (1)                                          |
| 6. Would you advise other children to become co-researchers? Why?                                                                                                | Yes, because it's (super) fun (9)<br>Yes, because it's interesting/you learn something from it (7)<br>Yes, because you receive a voucher (1)<br>Yes, because you can help other people (2)<br>Yes, because you get candy (1)<br>Yes, but it depends if it fits them (1) |
| 7. How would you consider your time invested? (Too long, adequate, too short)                                                                                    | Too long (1)<br>Adequate (12)<br>Too short (1; in between too short and adequate)                                                                                                                                                                                       |
| 8. a. What did you think of the compensation voucher (€10)? (phase one)<br>b. What did you think about having this project during school hours? Why? (phase two) | a. Fun/good (5) ...but not necessary (2), creative (1)<br>b. Fun/good, ...because you didn't have to work on school things (6)<br>...because you don't miss free time (4), don't mind (1)                                                                               |
| 9. Do you have advice on improving this evaluation form?                                                                                                         | Adding a question about the overall experience (1)<br>No (13)                                                                                                                                                                                                           |

\* Some participants gave multiple answers

## 1. Understanding of study procedures

The participants in the group meetings were able to recall the main idea of "doing research about research", which they expressed when they were asked about their expectations of the session. Nonetheless, not everybody remembered the details, such as whether pictures would be taken. Even though the information was especially directed to the children, the participants recalled that it was mostly read and signed by their parents at home, and not always discussed with them. This was different from the co-researchers in the individual meetings where both the researcher and the parents were present and empowered the children to complete the form themselves. Parents stayed available to help when necessary.

Most children mentioned that they had a generalized idea about their role in the project. Their specific role was clarified during the actual project. One of them explained:

*"I already understood it but once you are doing it you understand it [better]." (girl, 11 years old, individual meeting)*

## 2. Empowerment



1  
2  
3  
4 As a result of being involved as co-researchers, children gained knowledge, they learned new  
5 skills, and they became more confident in fulfilling their role during the analysis process. This  
6 was mostly due to having fun, experiencing something new, and being able to contribute to  
7 research or helping others. Children felt empowered by working as a co-researcher, as one of  
8 them explained:  
9  
10  
11  
12

13  
14  
15 *“It actually felt a bit like I was a researcher myself”* (girl, 11 years old, group meeting)  
16

17  
18 They reported obtaining new knowledge about a certain health condition and about  
19 experiencing what it is like to be ill. They learned how to do research, how to think critically,  
20 and how to take notes. Some representative answers were:  
21  
22  
23

24  
25 *“You have to think carefully before you draw conclusions.”* (boy, 11 years old, group  
26 meeting)  
27  
28

29  
30 *“A bit about how ill children felt afterwards [participating in research].”* (girl, 11 years  
31 old, group meeting)  
32  
33

34  
35 All participants were positive about the idea of being a co-researcher more often, mostly for  
36 similar reasons as why they wanted to take part in the first place:  
37  
38  
39

40  
41 *“Yes it was fun, sociable and instructive”* (girl, 11 years old, group meeting)  
42  
43

44 Only one participant mentioned it would depend on whether he had the time to take part. He  
45 explained this was due to his homework and sports activities in his free time. This participant  
46 was the only one who attended secondary school. All participants advised others to become a  
47 co-researcher, though one participant acknowledged that it might not suit everyone. She  
48 mentioned that some children might not like or have the skills to do such work.  
49  
50  
51  
52

53  
54 During the analysis process in phase one, the co-researchers noticeably became more confident  
55 as the time proceeded, and the adult researcher retreated to inspire confidence, and stimulate  
56 them to take the lead. Eventually, most participants took the lead, and, for example, also asked  
57  
58  
59  
60

1  
2  
3 the researcher questions about her observations, instead of the other way around. Still, most  
4 participants continued to need some form of structuring support from the main researcher.  
5  
6  
7

8 In the group meetings, the support needed from the adult researcher was a bit different. The co-  
9 researchers needed more structuring due to group dynamics. Chaos emerged when multiple co-  
10 researchers started to talk at the same time, and shyer children tended to not be heard.  
11 Interestingly, the two groups chose different ways of transforming their notes into the mind  
12 map. In one group, the adult researcher noticed a clear distinction in participants' role  
13 preferences, and the co-researcher divided roles together. Some wanted an executive role, such  
14 as writing down themes on the 'sticky notes', while others preferred a position in which they  
15 could just express their ideas and have a more coordinating role. Some found it hard to  
16 summarise their notes, and brought up a solution by adding some steps, such as underlining  
17 important notes:  
18  
19  
20  
21  
22  
23  
24

25  
26  
27 *"We could also just first underline what we think is important."* (girl, 11 years old,  
28 group meeting)  
29  
30  
31

32 The co-researchers in the other group, however, decided together that they all wanted to write  
33 down their own notes on 'sticky notes', and have them all on the mind map. The outcome was  
34 a mind map that not only showed different topics, it also gave insight into how important the  
35 individuals thought a certain topic by the amount of 'sticky notes' of the same topic. Others  
36 only needed a bit more time and space to find their own role.  
37  
38  
39  
40  
41  
42

43 The adult researchers were challenged not to give answers themselves when the participants  
44 indicated that they did not know how to proceed at a certain point in their analysis. Children  
45 felt reinforced when the adult researcher repeated or rephrased their question, acknowledging  
46 that they were doing the right thing. Both adult researchers were positively surprised by the co-  
47 researcher's achievements, which made this project feasible and likely to be valuable for the  
48 data interpretation as well as personally rewarding.  
49  
50  
51  
52  
53  
54

55 *"Experiencing how our co-researchers collaborated with us and each other in this*  
56 *research, the reflections they had and empathy they showed did not only empower them,*  
57 *it also made me feel empowered in the work we do."* (adult researcher, female, 27 years  
58 old)  
59  
60

1  
2  
3  
4  
5 They learned a lot from involving children in the analysis because the participants were very  
6 open and direct in their feedback. If they did not understand something, they directly expressed  
7 their struggles, for example when a question was not clearly formulated, or when they did not  
8 understand medical jargon such as ‘treatment protocol’.  
9  
10  
11  
12

13 Whereas the adult researchers tend to generalize findings when analysing the data, the child-  
14 co-researchers stuck more to the original data. One topic was, for example, advices to  
15 researchers for improvement of young people’s experiences during participation in research.  
16 The interviewees mentioned things like making a hospital visit more fun or enjoyable, and gave  
17 concrete examples how to make it more pleasant. All researchers (adults and children) started  
18 from the original data, but there seemed to be a difference in the analysis. In children’s analysis  
19 concrete examples of those advices remained, thereby putting emphasis on them, while adults  
20 generalised them into ‘things to brighten up the visits’. The child co-researchers brought the  
21 adults back to the details, which seem to be important to children.  
22  
23  
24  
25  
26  
27  
28  
29  
30

### 31 **3. Reflection on health and illness**

32 The participants empathized with the young people who were sharing their experiences in the  
33 video. They wondered if the young people were still ill and asked if they were alive, hoping  
34 they were all right. The following is a representative example:  
35  
36  
37  
38

39 *“Nobody of these children [in the video] is deadly ill, right?”* (girl, 11 years old, group  
40 meeting)  
41  
42  
43

44 The adult researcher explained the different conditions the interviewees had, and mentioned  
45 that some of them had been critically ill (e.g. having leukemia), but that they were stable when  
46 they were interviewed. The conversation then continued as followed:  
47  
48  
49  
50

51 *“But it is going better now?”* (girl, 11 years old, group meeting)

52 *“Yes, do you think that is important?”* (adult researcher, female, 27 years old)

53 *“Yes, I do, ... if you see someone like that [at the video].”* (girl, 11 years old, group  
54 meeting) *“...that would be a sad summary [otherwise].”* (boy, 11 years old, group  
55 meeting)  
56  
57  
58  
59  
60

1  
2  
3 The co-researchers asked questions about the illnesses, and its consequences on the lives of the  
4 children, for example for two siblings with a hereditary condition. They also shared experiences  
5 from their own lives, for example about relatives who had cancer.  
6  
7  
8  
9

#### 10 **4. Interest in the bigger picture**

11 Even though the participants were only involved in the analysis stage of the main interview  
12 study, they were well aware that this was part of a bigger study. They asked about the other  
13 participants and previous experiences with involving children in research analysis, and  
14 wondered whether the interviewees would see their mind maps that resulted from the analysis.  
15 Some of the questions they asked were:  
16  
17  
18  
19

20  
21 *“Have you been at children’s homes?” “Are you doing this [project] on other schools*  
22 *too?” “How many times have you done this?”* (multiple co-researchers at the focus  
23 groups, boy/girl, 11/12 years old, who were not clearly identifiable from the audio)  
24  
25  
26  
27

28 Hearing that they were the first group of children that participated as co-researchers in this  
29 project made them feel special. They expressed the wish to receive the final results and hoped  
30 we would do this project again. The co-researchers had a broader interest than just fulfilling  
31 their role as co-researchers, and asked why the adult researchers personally did this research  
32 project and whether it was part of their university training. They also acknowledged and liked  
33 that they were able to help the adult researchers with their research:  
34  
35  
36  
37  
38  
39

40 *“It is off course good for you [adult researchers] that we participate so that you can*  
41 *continue doing research about research of the research.”* (girl, 11 years old, group  
42 meeting)  
43  
44  
45  
46

#### 47 **5. Reflection on time investment**

48 Most children said the time investment was adequate. One child from the group meetings  
49 mentioned that it would have been better if the meeting was shorter since some children in the  
50 group got distracted:  
51  
52  
53  
54

55 *“Because at the end we were chatting a bit, [we got] distracted.”* [boy, 11 years old,  
56 group meeting]  
57  
58  
59  
60

1  
2  
3 This was also observed by the adult researchers. Another participant, however, reported he had  
4 wanted it to last longer because he really liked it and did not want to get back to his normal  
5 schoolwork. The phase two participants all reported that it was an interesting and nice  
6 alternative to the normal school tasks. They thought it was good to do the project during school  
7 time, because this way they would not miss out on any free time. One of the participants  
8 explained this:  
9

10  
11  
12  
13  
14  
15 *“It was fun because you didn’t have to work, and if it hadn’t been during school it was*  
16 *inconvenient” (girl, 11 years old)*  
17  
18  
19

20 From the adult perspective, time was invested in recruitment, developing material to introduce  
21 and explain the procedure, and mostly in thinking about how to best involve children. The time  
22 investment in analysis with co-researchers was time-intensive, and lasted longer than we had  
23 expected. However, the time investment was considered reasonable, given the reported  
24 empowerment of children, that they learned new skills, and that views of our data seemed to  
25 differ from ours, which is promising for better interpretation of our interviews. Materials were  
26 low cost, and there were minimal travel costs.  
27  
28  
29  
30  
31  
32  
33

## 34 **DISCUSSION**

35 Little evidence is available on how to involve children in research.[12] We described how  
36 relatively young children were involved in research interview analysis using a two-phase  
37 approach. Multiple strategies were used to avoid a tokenistic approach, to address challenges  
38 regarding time management, and to empower children in the process.  
39  
40  
41  
42  
43

### 44 **Two-phase approach**

45 Involving relatively young children (aged 10-14) in our analysis was challenging. We tried to  
46 limit preselection of data by adults through one-on-one meetings in which entire interviews  
47 were analysed. This might add value to Best’s promising ‘participatory theme elicitation’  
48 method.[19] Since these sessions were relatively long and intensive, it was an advantage that  
49 the adult researcher could focus solely on the individual co-researcher for further explanation  
50 and facilitation. We believe it also helped that the individual meetings took place at children’s  
51 homes, as this is a safe and familiar environment for them. This confirms findings from Dovey-  
52 Pearce et al who highlighted the importance of having face-to-face meetings to build on  
53 relationships.[20] The themes identified were further explored in the second phase through the  
54  
55  
56  
57  
58  
59  
60

1  
2  
3 group meetings. Working with multiple co-researchers in this phase improved the rigor of the  
4 qualitative analysis. In addition, there was an unexpected positive result for the co-researchers  
5 who were classmates. They strengthened their bond by sharing the research experience and  
6 reflecting on health and illness together. This two-phase approach made it possible to achieve  
7 our research goals and empower our co-researchers, while limiting the time invested for both  
8 adult and child researchers.  
9

### 15 **Use of videos in analysis**

16 Our aim was active involvement of our co-researchers in interview analysis in an effective and  
17 efficient way. Data analysis in qualitative research is often a long and intensive process with  
18 large amounts of text. Locock et al. reported that reading the transcripts for young people in  
19 their study was difficult and inefficient. They concluded that it was more valuable to start a  
20 conversation and discuss the data rather than digging into the detailed transcripts.[10]  
21 Therefore, we decided to test other ways of involving young co-researchers in the analysis.  
22 Visuals such as photographs, drawings, or mapping methods are often used for collaboration  
23 with young children to collect data about children's views on, for example, the things they value  
24 in their lives.[25] Darbyshire et al. reported that using a variety of qualitative visual techniques  
25 was beneficial for getting children interested and engaged in research, and it provided a good  
26 way for children to express their views. There is a problem with using visuals as a participatory  
27 method rather than in analysis, as Darbyshire et al. pointed out: "...having children take  
28 photographs and then having only adults 'interpret' (or possibly misinterpret) them is  
29 potentially an adultist approach to research on children that we sought to avoid".[26]  
30 Therefore, we used videos in the analysis stage to visualize the interview data that was to be  
31 analysed. Our study confirmed the benefits expressed by Darbyshire et al. The co-researchers  
32 liked the creative process when they developed the mind map, and the videos helped them to  
33 understand and empathize with the interviewees. Using the videos instead of transcripts made  
34 it more time efficient, while preserving the effectiveness of a thematic analysis. Reflecting on  
35 this, we realized that using videos rather than transcripts has another benefit regarding rigor of  
36 the qualitative data analyses. Analysis of interview data is often assumed to start at the moment  
37 that the interview has been fully transcribed, but even when this is verbatim, including  
38 descriptions of vocal emotions such as laughter, there will always be a loss of key elements  
39 such as volume of voices and facial expressions. This could present interviewees' experiences  
40 in a more abstract way than the original data show.[27, 28] In other words, by using videos, we  
41 might have started the analysis with a more authentic representation of our data.  
42  
43  
44  
45  
46  
47  
48  
49  
50  
51  
52  
53  
54  
55  
56  
57  
58  
59  
60

### **Additional considerations and further research**

Time investment is an important challenge for developing ways of involving children in research analysis. The method developed by Best et al. limited the analysis to two hours. Nevertheless, an additional time investment of four times 90-120 minutes was asked from participants for ‘capacity building.’ In these sessions, young people learned how to design and conduct a study, how to perform qualitative data analysis, and received an introduction into the subject of their data.[19] As described, we purposely did not train our co-researchers, both to avoid ‘fitting’ them into our own idea of what a qualitative researcher should be, and to limit time investment. Though we cannot make a comparison, the minimal training we provided to our co-researchers did not seem to have a negative impact on the result.

In addition to time investment, timing of research meetings should be considered. Many Young People’s Advisory Groups (YPAGs) plan their meetings mostly during school holidays or on weekends.[29] INVOLVE identified parents and schools as a significant barriers to public involvement during school hours: “...*lack of schools’ recognition of the value of their work sometimes acts as a barrier to them attending events which involve travel in school hours.*”[14, p12] Nevertheless, we managed to set up a collaboration with a primary school for the second phase of our study, and planned the group meetings during school hours. The headmaster recognized the value of the research being carried out with children at school. For our co-researchers in the group meetings, participation during school time was a great way to be involved, since they reported they had busy schedules in their free time. One of our co-researchers said that being busy with homework for secondary school might be a reason not to participate in similar project in the future.

We recently started testing our two-phase approach with young people age 16 to 18, who will use this project for a school assignment, thereby creating a win-win situation. If this proves beneficial, we will consider starting a long-term collaboration with both primary schools and secondary schools to optimize collaboration between researchers and children, which could be beneficial for both individual researchers and the schools involved. We expect that a comparison of findings between adults, children, and young people will bring interesting new insights from different life experiences and ages of the researchers involved.

### **Study limitations**

1  
2  
3 To test this new approach, we started with a small group of young co-researchers. A  
4 consequence is that we had to make a preselection of interviews from a larger dataset to explore  
5 in phase 1. Within this selection we aimed to have as much variation as possible, but we had to  
6 consider pragmatic matters as well, such as the length of the interviews. In addition, in our  
7 method children were not involved in making choices about specific quotes used in the results  
8 sections. As recruitment of co-researchers was a challenge, sampling was only based on age  
9 and on fluency in Dutch. However, a maximum variation sampling would be preferable to  
10 improve reflexivity.  
11  
12  
13  
14  
15  
16

## 17 **CONCLUSION**

18 Based on our study, we suggest that the two-phase approach provides an effective and efficient  
19 way to involve relatively young children in analysis of qualitative data by combining one-on-  
20 one meetings and group meetings. Presenting the interview data through videos rather than  
21 transcripts made it easier for children to understand the data, to empathize with the  
22 interviewees, and to limit time investment. The two-phase approach has the potential to prevent  
23 unrealistic interpretation of children's voices by adult researchers because it limits preselection  
24 of data by adults. Additional benefits are that children reflect on health and illness in their own  
25 lives, and they are empowered and engaged in medical research.  
26  
27  
28  
29  
30  
31  
32  
33  
34

## 35 **ETHICS APPROVAL**

36 Both this study (M18.2334032 2018, July 24<sup>th</sup>) and our larger study (M16.192386 2016, May  
37 10<sup>th</sup>) were concluded not to fall within the scope of the Medical Research Involving Human  
38 Subjects Act by the Medical Ethics Review Board of the University Medical Center Groningen.  
39  
40

## 41 **ACKNOWLEDGEMENTS**

42 We want to thank all participants in the original interview study, as well as our co-researcher  
43 participants from this project. Because this is a meta-analysis of the PPI project, we have  
44 decided not to invite the co-researchers as co-author on this article. Thanks to Laura Postma  
45 (PPIA2) for co-facilitating the group meetings.  
46  
47

## 48 **FUNDING STATEMENT**

49 This PPI study itself had low costs. Data collection for the main interview study was funded by the  
50 University of Groningen as part of the MD/PhD program of Malou Luchtenberg. This funding body has  
51 no role in the design of the study and collection, analysis, or interpretation of data, or in writing the  
52 manuscript.  
53  
54

## 55 **COMPETING INTERESTS STATEMENT**

56 None declared.  
57

## 58 **DATA SHARING STATEMENT**

59  
60



The original dataset with audio- and videotaped interviews is not available for the public due to privacy concerns.

### AUTHOR'S CONTRIBUTION

ML, EM and EV designed the original study. ML was responsible for the data collection in phase one, and the group meetings were led by ML (PPIA1). ML made the first draft of the article, which was discussed regularly within the team and reviewed by EM and EV. All authors read and approved the final manuscript.

### REFERENCES

1. World Medical Association. World Medical Association Declaration of Helsinki: ethical principles for medical research involving human subjects. *JAMA* 2013;310(20):2191–4. <https://doi.org/10.1001/jama.2013.281053>
2. Hennink M, Hutter I, Bailey A. *Qualitative Research Methods*. London: Sage 2011.
3. Taylor RM, Whelan JS, Gibson F, et al. Involving young people in BRIGHTLIGHT from study inception to secondary data analysis: insights from 10 years of user involvement. *Res Involv Engagem* 2018;4(1):1–14. <https://doi.org/10.1186/s40900-018-0135-x>
4. Jamal F, Langford R, Daniels P, et al. Consulting with young people to inform systematic reviews: an example from a review on the effects of schools on health. *Heal Expect* 2015;18(6):3225–35. <https://doi.org/10.1111/hex.12312>
5. Coad J, Evans R. Reflections on practical approaches to involving children and young people in the data analysis process. *Child Soc* 2008 Jan;22(1):41–52. <https://doi.org/10.1111/j.1099-0860.2006.00062.x>
6. Clavering EK, McLaughlin J. Children's participation in health research: from objects to agents? *Child Care Health Dev* 2010;36(5):603–11. <https://doi.org/10.1111/j.1365-2214.2010.01094.x>
7. Brady L-M, Preston J. Evaluating the extent and impact of young people's involvement in National Institute for Health Research (NIHR) studies: an assessment of feasibility. 2017 April. [http://www.invo.org.uk/wp-content/uploads/2017/06/Impact-of-CYPs-involvement\\_JLI\\_GenR.pdf](http://www.invo.org.uk/wp-content/uploads/2017/06/Impact-of-CYPs-involvement_JLI_GenR.pdf) (accessed 01-07-2019)
8. Lundy L, McEvoy L, Byrne B. Working with young children as co-researchers: an approach informed by the United Nations Convention on the Rights of the Child. *Early Educ Dev* 2011;22(5):714–36. <https://doi.org/10.1080/10409289.2011.596463>
9. Holland S, Renold E, Ross NJ, et al. Power, agency and participatory agendas: a critical exploration of young people's engagement in participative qualitative research. *Childhood* 2010;17(3):360–75. <https://doi.org/10.1177/0907568210369310>
10. Locock L, Kirkpatrick S, Brading L, et al. Involving service users in the qualitative analysis of patient narratives to support healthcare quality improvement. *Res Involv Engagem* 2019;5(1):1–11. <https://doi.org/10.1186/s40900-018-0133-z>
11. INVOLVE. What is public involvement in research? *NHS Natl Inst Heal Res* 2015. <http://www.invo.org.uk/find-out-more/what-is-public-involvement-in-research-2/> (accessed 10-07-2019)
12. Bird D, Culley L, Lakhanpaul M. Why collaborate with children in health research: an analysis of the risks and benefits of collaboration with children. *Arch Dis Child - Educ Pract Ed* 2013;98(2):42–8. <https://doi.org/10.1136/archdischild-2012-303470>
13. Preston J, Stones SR, Davies H, et al. How to involve children and young people in what is, after all, their research. *Arch Dis Child* 2019;104(5):494–500. <https://doi.org/10.1136/archdischild-2018-315118>

14. Sonpal K, Walker E, Swallow V, et al. Report on involving children and young people in research. Southampton: INVOLVE. 2019. <https://www.invo.org.uk/wp-content/uploads/2019/06/77620-YPv3-Booklet-WEB.pdf> (accessed 01-07-2019)
15. Blackburn S, McLachlan S, Jowett S, et al. The extent, quality and impact of patient and public involvement in primary care research: a mixed methods study. *Res Invol Engagem* 2018;4(1):1–18. <https://doi.org/10.1186/s40900-018-0100-8>
16. Domecq JP, Prutsky G, Elraiyah T, et al. Patient engagement in research: a systematic review. *BMC Heal Serv Res* 2014;14(89):1–9. <https://doi.org/10.1186/1472-6963-14-89>
17. Kellett M, Forrest R, Dent N, et al. “Just teach us the skills please, we’ll do the rest”: Empowering ten-year-olds as active researchers. *Child Soc* 2004;18(5):329–43. <https://doi.org/10.1002/chi.807>
18. Chappell P, Rule P, Dlamini M, et al. Troubling power dynamics: youth with disabilities as co-researchers in sexuality research in South Africa. *Childhood* 2014;21(3):385–99. <https://doi.org/10.1177/0907568214525427>
19. Best P, Badham J, Corepal R, et al. Network methods to support user involvement in qualitative data analyses: an introduction to Participatory Theme Elicitation. *Trials* 2017;18(1):1–14. <https://doi.org/10.1186/s13063-017-2289-5>
20. Dovey-Pearse G, Walker S, Fairgrieve S, et al. The burden of proof: The process of involving young people in research. *Health Expectations* 2019;22:465–474. <https://doi.org/10.1111/hex.12870>
21. Brederoschool. Academische Basisschool 2019. Groningen, the Netherlands. <https://brederoschool.openbaaronderwijsgroningen.nl/academischebasisschool/index.html> (accessed 09-11-2018)
22. Dutch Medical Research Involving Human Subjects Act (WMO), 26 February 1998. <https://wetten.overheid.nl/BWBR0009408/2019-04-02> (accessed 09-04-2019)
23. Cambridge University Press. Meaning of mind map in English. Cambridge Dictionary. 2019. <https://dictionary.cambridge.org/dictionary/english/mind-map> (accessed 19-09-2019)
24. Smith J, Firth J. Qualitative data analysis: the framework approach. *Nurse Researcher* 2011;18(2):52–62. <https://doi.org/10.7748/nr2011.01.18.2.52.c8284>
25. Coad J. Using art-based techniques in engaging children and young people in health care consultations and/or research. *J Res Nurs* 2007;12(5):487–97. <https://doi.org/10.1177/1744987107081250>
26. Darbyshire P, Macdougall C, Schiller W. Multiple methods in qualitative research with children: more insight or just more? *Qual Res* 2005;5(4):417–436. <https://doi.org/10.1177/1468794105056921>
27. Hewitt J. Ethical components of researcher-researched relationships in qualitative interviewing. *Qual Health Res* 2007;17(8):1149–59. <https://doi.org/10.1177/1049732307308305>
28. Alldred P, Gillies V. Eliciting research accounts: re/producing modern subjects. *Ethics in Qualitative Research*. London: Sage 2002:146–65.
29. Gaillard S, Malik S, Preston J, et al. Involving children and young people in clinical research through the forum of a European Young Persons’ Advisory Group: needs and challenges. *Fundam Clin Pharmacol* 2018 Aug;32(4):357–62. <https://doi.org/10.1111/fcp.12360>

Figure 1. Overview of presented study embedded in larger context of research

1  
2  
3  
4  
5  
6  
7  
8  
9  
10  
11  
12  
13  
14  
15  
16  
17  
18  
19  
20  
21  
22  
23  
24  
25  
26  
27  
28  
29  
30  
31  
32  
33  
34  
35  
36  
37  
38  
39  
40  
41  
42  
43  
44

3. Evaluation and reflection on co-researcher project (2)

2. Children as co-researchers (analysis 1):  
Two-phase project

1. Interview study on children's experiences in research

# BMJ Open

## 'I actually felt like I was a researcher myself.' On Involving Children in the Analysis of Qualitative Paediatric Research

|                                 |                                                                                                                                                                                                                                                                                                                                             |
|---------------------------------|---------------------------------------------------------------------------------------------------------------------------------------------------------------------------------------------------------------------------------------------------------------------------------------------------------------------------------------------|
| Journal:                        | <i>BMJ Open</i>                                                                                                                                                                                                                                                                                                                             |
| Manuscript ID                   | bmjopen-2019-034433.R2                                                                                                                                                                                                                                                                                                                      |
| Article Type:                   | Original research                                                                                                                                                                                                                                                                                                                           |
| Date Submitted by the Author:   | 17-Mar-2020                                                                                                                                                                                                                                                                                                                                 |
| Complete List of Authors:       | Luchtenberg, Malou; University of Groningen; University Medical Center Groningen, Department of Pediatrics<br>Maeckelberghe, Els; University of Groningen, Institute for Medical Education; University Medical Center Groningen<br>Verhagen, Eduard; University of Groningen; University Medical Center Groningen, Department of Pediatrics |
| <b>Primary Subject Heading</b>: | Paediatrics                                                                                                                                                                                                                                                                                                                                 |
| Secondary Subject Heading:      | Ethics, Qualitative research, Research methods                                                                                                                                                                                                                                                                                              |
| Keywords:                       | Involvement, Children, PAEDIATRICS, Patient Participation, Biomedical Research, QUALITATIVE RESEARCH                                                                                                                                                                                                                                        |
|                                 |                                                                                                                                                                                                                                                                                                                                             |

SCHOLARONE™  
Manuscripts



I, the Submitting Author has the right to grant and does grant on behalf of all authors of the Work (as defined in the below author licence), an exclusive licence and/or a non-exclusive licence for contributions from authors who are: i) UK Crown employees; ii) where BMJ has agreed a CC-BY licence shall apply, and/or iii) in accordance with the terms applicable for US Federal Government officers or employees acting as part of their official duties; on a worldwide, perpetual, irrevocable, royalty-free basis to BMJ Publishing Group Ltd ("BMJ") its licensees and where the relevant Journal is co-owned by BMJ to the co-owners of the Journal, to publish the Work in this journal and any other BMJ products and to exploit all rights, as set out in our [licence](#).

The Submitting Author accepts and understands that any supply made under these terms is made by BMJ to the Submitting Author unless you are acting as an employee on behalf of your employer or a postgraduate student of an affiliated institution which is paying any applicable article publishing charge ("APC") for Open Access articles. Where the Submitting Author wishes to make the Work available on an Open Access basis (and intends to pay the relevant APC), the terms of reuse of such Open Access shall be governed by a Creative Commons licence – details of these licences and which [Creative Commons](#) licence will apply to this Work are set out in our licence referred to above.

Other than as permitted in any relevant BMJ Author's Self Archiving Policies, I confirm this Work has not been accepted for publication elsewhere, is not being considered for publication elsewhere and does not duplicate material already published. I confirm all authors consent to publication of this Work and authorise the granting of this licence.

1  
2  
3 **‘I actually felt like I was a researcher myself.’**  
4

5 **On Involving Children in the Analysis of Qualitative Paediatric Research**  
6

7 Malou Luchtenberg, Els Maeckelberghe, Eduard Verhagen

8 University of Groningen, University Medical Center Groningen  
9

10  
11  
12  
13 Malou L. Luchtenberg

14 Department of Pediatrics, Beatrix Children’s Hospital

15 University of Groningen, University Medical Center Groningen, the Netherlands  
16

17  
18  
19 Els L.M. Maeckelberghe

20 Institute for Medical Education

21 University of Groningen, University Medical Center Groningen, the Netherlands  
22

23  
24  
25 A.A. Eduard Verhagen

26 Department of Pediatrics, Beatrix Children’s Hospital

27 University of Groningen, University Medical Center Groningen, the Netherlands  
28

29  
30  
31 **Corresponding author:**

32 Malou L. Luchtenberg

33 PO Box 30 001, 9700 RB Groningen

34 The Netherlands

35 m.l.luchtenberg@umcg.nl

36 +31 6 25 64 96 59  
37  
38  
39  
40  
41  
42  
43  
44

45 Word count: 4329 (excl. title page, abstract, references, tables and quotes)  
46  
47

48 **Keywords:** involvement, children, paediatrics, patient participation, biomedical research,  
49 qualitative research  
50  
51  
52  
53  
54  
55  
56  
57  
58  
59  
60

## ABSTRACT

### Objectives

To evaluate the feasibility of a new approach to paediatric research whereby we involved children in analysing qualitative data, and to reflect on the involvement process.

### Setting

This was a single-centre, qualitative study in the Netherlands. It consisted of research meetings with individual children at home (Phase 1) or group meetings at school (Phase 2). In Phase 1 we identified themes from a video interview during five one-on-one meetings between a child co-researcher and the adult researcher. In Phase 2, during two group meetings, we explored the themes in detail using fragments from 16 interviews.

### Participants

We involved 14 school children (aged 10 to 14) as co-researchers to analyse children's interviews about their experience while participating in medical research. Notes were taken, and children provided feedback. A thematic analysis was performed using a framework approach.

### Results

All co-researchers identified themes. The time needed to complete the task varied, as did the extent to which the meetings needed to be structured to improve concentration. The children rated time investment as adequate and they considered acting as co-researcher interesting and fun, adding that they had learnt new skills and gained new knowledge. The experience also led them to reflect on health matters in their own lives. The adult researchers considered the process relatively time intensive, but the project did result in a more critical assessment of their own work.

### Conclusion

The new, two-phase approach of involving children to help analyse qualitative data is a feasible research method. The novelty lies in involving children to help identify themes from original interview data before exploring these themes in detail. Preselection of data is thus limited. We recommend using videos rather than transcripts. Videos make it easier for children to understand the data and to empathise with the interviewees, and limits time investment.

## STRENGTHS AND LIMITATIONS OF THIS STUDY

- This study describes a new approach to paediatric research whereby children are involved in analysing qualitative interview data. Its novelty lies in the fact that children are involved in helping to identify themes from original data as well as exploring the themes in more detail.
- This study explores the use of videos rather than transcripts to present the interviews to relatively young co-researchers.
- The study reflects on children's involvement as co-researchers from the perspective of the children themselves and from that of the adult researchers.
- In test phase presented here we limited the number of child co-researchers and selected the interviews from a larger dataset to include as much variation as possible.

## INTRODUCTION

1  
2  
3  
4  
5  
6 Researchers should be wary of interpretation bias when analysing data of qualitative studies.  
7 Qualitative research includes a subjective component that calls for reflexivity.[2] Because the  
8 life experiences and social situations of children differ from those of adults, their  
9 interpretations of data derived from interviews with children may differ from adults'  
10 interpretations. It is therefore desirable to involve children to strengthen the analysis of such  
11 qualitative data. There is little evidence in the literature on how children could be effectively  
12 involved in scientific data analysis.[3–10] Other challenges regarding patient and public  
13 involvement (PPI) [11] of children include lack of funding and lack of time, gatekeeping or  
14 power imbalances, and concerns about obtaining knowledge and training on how to involve  
15 children.[3,6,12–18] Measuring the impact of a PPI process on research output is difficult  
16 because the involvement process itself is complex and therefore its impact cannot be fully  
17 captured by evaluating outcomes.[19]  
18  
19  
20  
21  
22  
23  
24  
25  
26

27  
28 Best and colleagues recently introduced a new method called participatory theme elicitation,  
29 whereby a youth advisory panel is involved in qualitative data analysis. The method involves  
30 capacity building (training), data selection by adult researchers, data sorting by youth  
31 members, and final grouping and analysis by adult researchers.[20] A disadvantage of the  
32 method is that it involves data preselection by adults. We hypothesise that it is feasible to  
33 involve children from the beginning of data analysis, starting with the identification of themes  
34 from original data.  
35  
36  
37  
38  
39  
40  
41

42 In a larger unpublished study, we collected the experiences of young people regarding their  
43 participation in medical research in order to provide recommendations for improving  
44 children's participation in research. In the present study, we aimed to explore whether it is  
45 feasible to involve children in the analysis of the qualitative data. We designed a two-phase  
46 approach that would be effective and efficient. Effective in the sense that it involved children  
47 to identify themes as well as to explore the themes in more detail and efficient in the sense of  
48 limiting time investment. We also aimed to reflect on the involvement process from the  
49 perspective of both adults and children. The results of the qualitative data analysis are to be  
50 published elsewhere.  
51  
52  
53  
54  
55  
56  
57  
58

### Patient and public involvement



1  
2  
3 We explored the feasibility of an approach whereby children were involved in qualitative data  
4 analysis, both in helping adult researchers to identify themes from original data as in  
5 exploring the themes in more detail.  
6  
7  
8  
9

## 10 11 **METHODS**

12 This was a single-centre study performed by researchers of University Medical Center  
13 Groningen, the Netherlands. We investigated the involvement of children as co-researchers in  
14 identifying and analysing themes from interview data presented on video. We conducted the  
15 investigation in two phases: Phase 1 consisted of five individual meetings, and Phase 2 of two  
16 group meetings. In addition, we reflected on the children's involvement in the analysis  
17 process.  
18  
19  
20  
21  
22

### 23 24 **Recruitment and sampling**

#### 25 Phase 1

26 We approached potential co-researchers through national patient support organizations,  
27 primary schools, hospitals, social media, and by word-of-mouth. No research experience was  
28 required of the participants. Sampling was based on age (9-18 years) and participants were  
29 required to be fluent in Dutch because the meetings were held in that language. Initially,  
30 seven children volunteered. They each received an information leaflet. Even though  
31 recruitment was challenging we managed to achieve our goal of five participants in Phase 1.  
32  
33  
34  
35  
36  
37  
38

#### 39 Phase 2

40 We recruited the participants for Phase 2 in collaboration with a specific primary school in  
41 Groningen, the Netherlands, where teachers and learners are expected to display an academic  
42 mind-set aimed at research and analysis.[21] We invited one class of 15 children of the  
43 school's oldest learners to participate. Ten learners volunteered, one of whom was unable to  
44 participate because of illness.  
45  
46  
47  
48  
49  
50

### 51 **Informed consent**

#### 52 Phase 1

53 We supplied the potential participants with verbal and written information. We asked them to  
54 discuss the study with their parents and to reply by post, e-mail or by telephone. Before the  
55 session at the child's home started, he or she read the informed consent form and discussed it  
56 with the researcher and a parent. One parent was present throughout the session, but was  
57  
58  
59  
60

1  
2  
3 kindly asked to not interfere with the process. All the children, irrespective of age, were asked  
4 to sign the informed consent form to acknowledge that we appreciated their contribution  
5 equally. In accordance with the Dutch Medical Research Involving Human Subjects Act ,  
6 parental consent was obtained in addition to the child's consent.[22] Children were also asked  
7 to sign a confidentiality agreement regarding any personal information present in the data  
8 they analysed. At the end of the session we gave the participants a €10 gift voucher as token  
9 of our appreciation of their time and a certificate acknowledging their contribution as co-  
10 researchers.  
11  
12  
13  
14  
15  
16  
17

## 18 Phase 2

19 Two adult researchers visited the primary school to meet the learners, their teacher and  
20 headmaster, and to introduce the research project. The headmaster agreed to allow the  
21 children to participate during school hours. The potential participants received an information  
22 leaflet similar to the one given to the participants of Phase 1. We asked them to complete the  
23 consent form and the confidentiality agreement at home with a parent, and to return the form  
24 to their teacher. At the end of the group meetings we gave the participants a certificate. These  
25 children were not given a gift voucher because they participated during school hours.  
26  
27  
28  
29  
30  
31  
32  
33

## 34 Data characteristics

35 Data from the original interview study were analysed by our co-researchers. In addition, the  
36 adult researchers took notes during the analyses and written feedback was obtained from the  
37 participants before, during, and after participating. In Table 1 we provide additional  
38 information on the data collected for the original interview study. Out of a total of 23  
39 interviews two were excluded because they were not videotaped. Another five were excluded  
40 because participants and parents had not consented to use the video data.  
41  
42  
43  
44  
45  
46  
47

48 Table 1. Details of data of the original interview study on children's experiences in medical  
49 research  
50

| Study characteristics            |                                                                                                                                                                                                                                                                                                                       |
|----------------------------------|-----------------------------------------------------------------------------------------------------------------------------------------------------------------------------------------------------------------------------------------------------------------------------------------------------------------------|
| <b>Aim</b>                       | To explore children's experiences in medical research to obtain recommendations from their perspectives on how to improve children's involvement in research.                                                                                                                                                         |
| <b>Setting and research team</b> | Single-centre study conducted by a team of researchers at University Medical Center Groningen, the Netherlands. The research team consisted of an ethicist (EM), paediatrician (EV), and MD/PhD student (ML). All members were trained researchers and/or had previous experience in conducting qualitative research. |

|                                 |                                                                                                                                                                                                                                                                                                                                                                                                                                                                                                                                                                                                                                                          |
|---------------------------------|----------------------------------------------------------------------------------------------------------------------------------------------------------------------------------------------------------------------------------------------------------------------------------------------------------------------------------------------------------------------------------------------------------------------------------------------------------------------------------------------------------------------------------------------------------------------------------------------------------------------------------------------------------|
| <b>Recruitment and sampling</b> | Recruitment through health providers from several hospitals, national patient support groups, social media, and by word-of-mouth. Purposive maximum variation sample: children, patients as well as healthy volunteers between 9 and 18 years old who were invited to participate in different types of medical research in the Netherlands and who either took part or declined to take part. The participants had no prior relationships with the members of the research team.                                                                                                                                                                        |
| <b>Informed consent</b>         | Informed consent given by one parent and the child or, in accordance to Dutch law, from 16 years and older by the child only.                                                                                                                                                                                                                                                                                                                                                                                                                                                                                                                            |
| <b>Data collection</b>          | Twenty three semi-structured, in-depth interviews, lasting between 30 and 100 minutes, with children about their experiences in taking part in medical research, including recommendations for improvement of children's involvement in informed consent procedures and the research itself. A topic guide was developed based on a previous study in the United Kingdom. Interviews performed by ML took place at children's homes and were recorded on audio or video, transcribed verbatim, and returned to the participants. No comments from participants were received. Data collection continued until we reached data saturation of main themes. |
| <b>Ethical approval</b>         | The conclusion of the Medical Ethics Review Board of the University Medical Center Groningen was that this study, no. M16.192386, 10 May 2016 fell beyond the scope of the Dutch Medical Research Involving Human Subjects Act .                                                                                                                                                                                                                                                                                                                                                                                                                         |

The co-researchers received a brief interactive introduction to paediatric research and to the original interview study. They were asked to identify the main topics in video interviews and to summarise them on mind maps (*A type of diagram with lines and circles for organising information so that it is easier to use or remember*).<sup>[23, p1]</sup> To prevent the children from becoming 'little adult researchers' we did not train them extensively. Extensive training would also have been more time consuming for both the children and the researchers.

In Phase 1 the five co-researchers collaborated with the coordinating researcher (PPIA1 – PPI adult researcher 1 in a one-on-one session to identify the main themes in five different interviews. Together they watched a video of between 25 to 45 minutes of another young person and discussed the emerging themes. This took place at the participants' home and lasted between two and three and a half hours. During Phase 1 the adult researcher spent a total of eleven hours travelling to and from co-researchers homes.

During the two group meetings in Phase 2, we explored in detail two themes that had been identified during Phase 1. For this purpose we compiled two five-minute videos from fragments of several interviews from the dataset of the original study. The group meetings took place at a local primary school and lasted approximately two and a half hours. Travelling time for adult researchers was two hours, including the introductory meeting when we handed out the information sheets. In addition to travelling time, the time investment of adult

1  
2  
3 researchers was approximately five hours. This included the time spent preparing the  
4 instructions and making the compilation videos. The material costs of the project were low  
5 and the travelling costs minimal.  
6  
7  
8  
9

10 The aim of the analysis process in both phases was to identify the main themes in the video  
11 through open, unstructured discussions with the child co-researchers. To facilitate interaction  
12 and discussion the co-researchers and the adult researchers could pause the video at any time.  
13 They took notes of what they thought the interviewee found important. PPIA1 and PPIA2  
14 allowed moments of personal reflection, but were on guard for potential intertwining of co-  
15 researchers' personal experiences with interviewees' experiences. After watching the video  
16 the co-researchers drew a mind map depicting their interpretation of the connection between  
17 different themes.[23] The mind maps were drawn on A3-sized sheets of paper, using  
18 different sizes of sticky notes, and coloured pens. Besides, the participants were free to use  
19 materials of their own choice. The researcher asked the participants questions about the  
20 importance of certain themes, the identification of overlapping themes, and the reason why  
21 they had chosen a certain theme. The participants led the discussion and made the final  
22 decision in case of a disagreement about a theme.  
23  
24  
25  
26  
27  
28  
29  
30  
31  
32  
33

### 34 **Data collection and analysis**

35 Before the study actually commenced, we asked the child co-researchers why they would like  
36 to take part. The adult researchers took notes of how participants fulfilled their role as co-  
37 researcher, and how the participants reflected on this process. Child co-researchers completed  
38 a feedback form after the analysis (Table 2). In addition, we briefly evaluated the process  
39 orally. All meetings were recorded on audio tape.  
40  
41  
42  
43  
44

45 We performed a thematic analysis using a framework approach.[24] Familiarisation and  
46 initial theme identification was done by PPIA1 (ML) and discussed with EM (individual  
47 meetings) and PPIA2 (group meetings) based on the audio tape, notes, and the participants'  
48 written feedback. Some themes, such as time investment, were identified in advance from the  
49 literature, others were derived from the data. Themes were refined and conceptualised during  
50 regular meetings with the research team and any disagreements were discussed and a final  
51 decision reached by consensus. Because the sample for this exploratory study was relatively  
52 small, we did not aim for data saturation.  
53  
54  
55  
56  
57  
58  
59  
60

Table 2. Feedback form

|                                                                                           |                                                                                               |
|-------------------------------------------------------------------------------------------|-----------------------------------------------------------------------------------------------|
| 1. Did you understand beforehand what your role was in the project? (No / a little / yes) | 6. Would you recommend other children to become co-researchers? Why?                          |
| 2. How could we improve the information about working as a co-researcher?                 | 7. How would you rate your time investment? (Too long, adequate, too short)                   |
| 3. What was it like for you to work as a co-researcher?                                   | 8. a. What did you think of the EUR 10 gift voucher? (Phase 1)                                |
| a. positive aspects                                                                       | b. What did you think about participating in this project during school hours? Why? (Phase 2) |
| b. points of improvement                                                                  | 9. Do you have suggestions for improving this evaluation form?                                |
| 4. Did you learn anything from being a co-researcher? If so, what did you learn?          |                                                                                               |
| 5. Would you like to be a co-researcher more often?                                       |                                                                                               |

## RESULTS

### Participant characteristics

Fourteen children, eight girls and six boys, participated as co-researchers in this study. Two participants had experience because they had been chronic patients themselves. None of the children had been a co-researcher before. Tables 3 and 4 show the characteristics of the child and adult participants.

Table 3. Child participant characteristics

| Characteristics of child co-researchers               | N* (%)** |
|-------------------------------------------------------|----------|
| <i>Sex</i>                                            |          |
| Girl                                                  | 8 (57)   |
| Boy                                                   | 6 (43)   |
| <i>Age</i>                                            |          |
| 10 years                                              | 1 (7)    |
| 11 years                                              | 10 (71)  |
| 12 years                                              | 2 (14)   |
| 13 years                                              | 0 (0)    |
| 14 years                                              | 1 (7)    |
| <i>School attended</i>                                |          |
| Primary School                                        | 13 (93)  |
| Secondary School                                      | 1 (7)    |
| <i>Hospital/Disease experience (lived experience)</i> |          |
| Currently suffering from a disease                    | 2 (14)   |
| Hospitalization or minor surgery in the past          | 6 (43)   |
| Family member(s) who suffer from a disease            | 2 (14)   |
| None                                                  | 4 (29)   |
| <i>Research experience as participant</i>             |          |
| Yes                                                   | 2 (14)   |
| No                                                    | 12 (86)  |
| <i>Experience as co-researcher</i>                    |          |
| Yes                                                   | 0 (0)    |
| No                                                    | 14 (100) |

\* Number of child participants; N = 14

\*\* Rounded to nearest whole number

Table 4. Adult participants characteristics

| Participant | Age | Sex   | Experience illness /hospital                                      | Research experience (participating in research)                 | Research experience (performing research)                       |
|-------------|-----|-------|-------------------------------------------------------------------|-----------------------------------------------------------------|-----------------------------------------------------------------|
| PPIA1       | 27  | Woman | As a medical student. Graduated as medical doctor in August 2019. | Yes. Participant in two large cohort studies for several years. | Training and experience in qualitative research for PhD.        |
| PPIA2       | 23  | Woman | As a medical student. Started internships in September 2019.      | No previous experience in medical research participation.       | Trained in qualitative research as a former psychology student. |

### Reflection and evaluation of the involvement process

The results can be divided into five main themes: (1) understanding the study procedures, (2) empowerment, (3) reflection on health and illness, (4) interest in the bigger picture, and (5) reflection on time investment. The results of the feedback form are summarised in Table 5.

Table 5. Summary of written feedback

| Theme (question from Table 2)                          | Summary of written feedback                                                     | N* (%)** |
|--------------------------------------------------------|---------------------------------------------------------------------------------|----------|
| <b>Understanding the study procedures</b><br>(1,2,9)   | <i>Understanding their role as co-researcher before start***</i>                |          |
|                                                        | No                                                                              | 0 (0)    |
|                                                        | A little                                                                        | 12 (86)  |
|                                                        | Yes                                                                             | 2 (14)   |
| <b>Empowerment</b><br>(3-6)                            | <i>Suggestions for improving the information about working as co-researcher</i> |          |
|                                                        | Don't know                                                                      | 4 (29)   |
|                                                        | Everything was clear                                                            | 5 (36)   |
|                                                        | Use fewer difficult words                                                       | 4 (29)   |
|                                                        | Explain that we had to take notes and create a mind map                         | 1 (7)    |
| <b>Empowerment</b><br>(3-6)                            | <i>Suggestions for improving the feedback form of the co-researcher project</i> |          |
|                                                        | Adding a question about the overall experience                                  | 1 (7)    |
|                                                        | No recommendations                                                              | 13 (93)  |
|                                                        | <i>Positive experience as co-researcher</i>                                     |          |
|                                                        | Fun                                                                             | 14 (100) |
|                                                        | Interesting                                                                     | 4 (29)   |
|                                                        | Helping other children                                                          | 1 (7)    |
|                                                        | Learning something new                                                          | 1 (7)    |
|                                                        | Time investment was okay                                                        | 2 (14)   |
|                                                        | Receiving a certificate                                                         | 1 (7)    |
| <i>Points of improvement for co-researcher project</i> | No points of improvement                                                        | 12 (86)  |
|                                                        | Shorter interviews                                                              | 1 (7)    |
|                                                        | The project should take the whole school day (instead of a half one)            | 1 (7)    |
| <i>Lessons learnt from being a co-researcher</i>       | Taking notes                                                                    | 2 (14)   |
|                                                        | Critical thinking and listening                                                 | 4 (29)   |
|                                                        | About a medical condition                                                       | 2 (14)   |
|                                                        | About doing research                                                            | 2 (14)   |
|                                                        | About how children think and feel about research                                | 2 (14)   |
|                                                        | That children think differently from adults                                     | 1 (7)    |

|                                  |                                                                              |         |
|----------------------------------|------------------------------------------------------------------------------|---------|
|                                  | That it is fun and that you learn a lot                                      | 1 (7)   |
|                                  | Not really                                                                   | 1 (7)   |
|                                  | <i>Would like to be co-researcher more often including reason</i>            |         |
|                                  | Yes, because it's fun                                                        | 12 (86) |
|                                  | Yes, because it's interesting                                                | 5 (36)  |
|                                  | Yes, because I like to help people                                           | 1 (7)   |
|                                  | Yes, I know what to expect now                                               | 1 (7)   |
|                                  | Yes, if it doesn't hurt                                                      | 1 (7)   |
|                                  | It is fun, but depends on how much time I have                               | 1 (7)   |
|                                  | <i>Would you recommend others to become co-researcher?</i>                   |         |
|                                  | Yes, because it's (super) fun                                                | 9 (64)  |
|                                  | Yes, because it's interesting/you learn something from it                    | 7 (50)  |
|                                  | Yes, because you receive a gift voucher                                      | 1 (7)   |
|                                  | Yes, because you can help other people                                       | 2 (14)  |
|                                  | Yes, because you get sweets                                                  | 1 (7)   |
|                                  | Yes, but it depends on whether it suits them                                 | 1 (7)   |
| <b>Time investment</b><br>(7,8b) | <i>Rating of time investment***</i>                                          |         |
|                                  | Too long                                                                     | 1 (7)   |
|                                  | Adequate                                                                     | 12 (86) |
|                                  | Too short                                                                    | 1 (7)   |
|                                  | <i>Thoughts on having this project during school time (Phase 2, n=9)****</i> |         |
|                                  | Fun/good, because you didn't have to do schoolwork                           | 6 (67)  |
|                                  | Fun/good, because you don't miss free time after school                      | 4 (44)  |
|                                  | Don't mind                                                                   | 1 (11)  |
| <b>Compensation</b><br>(8b)      | <i>Thoughts on receiving a gift voucher (Phase 1, n=5)****</i>               |         |
|                                  | Fun/good                                                                     | 5 (100) |
|                                  | Not necessary                                                                | 2 (40)  |
|                                  | Creative                                                                     | 1 (20)  |

\* Number of child participants; N = 14. Some participants provided more than one answer

\*\* Rounded to nearest whole number

\*\*\* The feedback provided is based on a multiple choice question

\*\*\*\* Calculation based on a sub-selection of total participants, because children took part in a different phase

## 1. Understanding of study procedures

When we asked the participants in the group meetings what they expected of the session, they remembered that the main idea was *'doing research about research.'* Nonetheless, not everyone remembered the details such as whether photographs would be taken. Even though the information was especially written with children in mind, the participants recalled that it was mostly read and signed by their parents, and had not always been discussed with them. In the case of the co-researchers in the individual meetings this was different. Here the researcher and the parents were present and encouraged the children to complete the form themselves. Parents were available in the background in case their help was needed. Most children reported that they had a general idea about what their role was in the project. We explained their role to them in detail during the actual project. One of them explained:

*'I already understood it but once you are doing it you understand it [better].'* (Girl, 11 years old, individual meeting)

## 2. Empowerment

By involving children as co-researchers they gained knowledge, they learnt new skills, and they became more confident in fulfilling their role during the analysis process. This was mostly because they enjoyed the new experience of contributing to research or helping others. Children felt empowered by working as a co-researcher. One of them explained it as:

*'It actually felt a bit like I was a researcher myself.'* (Girl, 11 years old, group meeting)

They reported gaining new knowledge about certain health matters and they realised what it is like to be ill. They learnt how to do research, how to think critically, and how to take notes. Here are some representative answers given:

*'You have to think carefully before you draw conclusions.'* (Boy, 11 years old, group meeting)

*'A bit about how ill children felt afterwards [after participating in research].'* (Girl, 11 years old, group meeting)

All the participants were positive about the idea of being a co-researcher more often, mostly for similar reasons as for wanting to take part in the first place:

*'Yes, it was fun, relaxed, and instructive.'* (Girl, 11 years old, group meeting)

One participant, the only one attending secondary school, mentioned it would depend on whether he had the time to take part because of homework and sports activities in his free time. All participants reported that they would recommend others to become co-researchers, though one participant acknowledged that it might not suit everyone. She mentioned that some children might not enjoy it or might not have the skills to do such work.

During the analysis process in Phase 1, the co-researchers grew noticeably more confident as time progressed. The adult researcher retreated to the background and stimulated the co-researchers to take the lead, which most of them did eventually. One participants actually



1  
2  
3 asked the researcher questions about her observations, instead of the other way around. Most  
4 participants, however, needed some form of structuring support from the adult researcher  
5 throughout.  
6  
7  
8  
9

10 During the group meetings the support needed from the adult researcher was different. The  
11 co-researchers needed more structuring because of group dynamics. Chaos ensued when  
12 several co-researchers started talking at the same time, and shy children tended to not be  
13 heard. Interestingly, the two groups chose different ways of translating their notes to the mind  
14 map. In one group the adult researcher noticed a clear distinction in participants' role  
15 preferences, and the co-researchers divided the roles between themselves. Some preferred an  
16 executive role, such as writing down themes on the 'sticky notes', while others preferred to  
17 simply express their ideas and to play a more coordinating role. Some found it difficult to  
18 summarise their notes and suggested first underlining important notes:  
19  
20  
21  
22  
23  
24

25  
26  
27 *'We could also just first underline what we think is important.'* (Girl, 11 years old,  
28 group meeting)  
29  
30  
31

32 The co-researchers in the other group together decided that they all wanted to write down  
33 their own notes on 'sticky notes' and to put them all on the mind map. The outcome was a  
34 mind map that displayed different topics as well as providing insight into how important the  
35 individuals thought a certain topic was by the number of 'sticky notes' on the same topic.  
36 Others only needed a bit more time and space to find their own role.  
37  
38  
39  
40  
41

42 It was challenging for the adult researchers to not provide answers themselves when the  
43 participants indicated that they did not know how to proceed with the analysis. By repeating  
44 or rephrasing their question and by acknowledging that they were doing the right thing, the  
45 adult researcher could reinforce the children. Both adult researchers were surprised by the co-  
46 researcher's achievements. Throughout the project the co-researchers displayed the ability to  
47 identify themes and to visualise them in mind maps, underlining the feasibility of this  
48 approach and its value for interpreting data.  
49  
50  
51  
52  
53  
54  
55

56 The researchers learnt a great deal from involving children in the analyses because the  
57 participants were very open and direct in their feedback. If they did not understand something,  
58  
59  
60

1  
2  
3 for example, if a question was not clearly formulated, or if they did not understand medical  
4 jargon such as ‘treatment protocol’, they said so immediately.  
5  
6  
7

8 Whereas the adult researchers tended to generalise findings, the co-researchers stuck more to  
9 the original data. One topic, for example, dealt with recommendations to researchers for  
10 improving young people’s experiences when participation in medical research. The  
11 interviewees mentioned issues like making hospital visits more enjoyable and gave concrete  
12 suggestions. All the researchers, adults and children alike, started from the original data, but  
13 there appeared to be a difference in analysis. The concrete suggestions in the children’s  
14 analyses remained and made their recommendations were therefore emphasised, while the  
15 adults generalised them into ‘ways to brighten up the visits’. The co-researchers brought the  
16 adults back to the basics that were important to children.  
17  
18  
19  
20  
21  
22  
23  
24  
25

### 26 **3. Reflection on health and illness**

27 The participants empathised with the young people who shared their experiences in the video.  
28 They wondered whether they were still ill or asked if they still lived and hoped they were all  
29 right. The following is a representative example:  
30  
31  
32

33 *‘None of these children [in the video] is deadly ill, right?’* (Girl, 11 years old, group  
34 meeting)  
35  
36  
37  
38

39 The adult researcher explained the different illnesses the interviewees had, and mentioned that  
40 some of them had been critically ill, for example, with leukaemia, but that they were stable at  
41 the time they were interviewed.  
42  
43  
44  
45

46 The co-researchers asked questions about the illnesses and what the consequences might be  
47 for the lives of the children such as two siblings with a hereditary condition. They also shared  
48 their own experiences, for example, about relatives who had cancer.  
49  
50  
51  
52

### 53 **4. Interest in the bigger picture**

54 Even though we only involved the participants in the analysis stage of the main interview  
55 study, they were well aware that this was part of a bigger study. They asked about the other  
56 participants and previous experiences with involving children in research analysis, and  
57 wondered whether we would show the mind maps they had made to the interviewees.  
58  
59  
60

1  
2  
3 Some of the questions they asked were:  
4  
5

6 *'Have you been to children's homes?' 'Are you also doing this [project] at other*  
7 *schools?'* *'How many times have you done this?'* (Several co-researchers in the focus  
8 groups, boys and/or girls, 11 or 12 years old, not clearly identifiable from the audio)  
9  
10  
11  
12

13 Hearing that they were the first group of children that participated as co-researchers in this  
14 project made them feel special. They expressed the wish to receive the final results and hoped  
15 we would do this project again. The co-researchers had a broader interest than just fulfilling  
16 their role as co-researchers. They also asked personal questions, such as why the adult  
17 researchers did this research project and whether it was part of their university training. They  
18 also acknowledged and enjoyed helping the adult researchers with their research:  
19  
20  
21  
22  
23  
24

25 *'It is, off course, good for you [adult researchers] that we participate so that you can*  
26 *continue doing research about research of the research.'* (Girl, 11 years old, group  
27 meeting)  
28  
29  
30  
31

### 32 **5. Reflection on time investment**

33 Most children said the time investment was appropriate. One child in the group meetings  
34 reported that a shorter meeting would have been better because some children became  
35 distracted:  
36  
37  
38  
39

40 *'Because at the end we were chatting a bit, [we got] distracted.'* [Boy, 11 years old,  
41 group meeting]  
42  
43  
44  
45

46 This was also observed by the adult researchers. Another participant, however, reported that  
47 he would have like the session to last longer because he really liked it and did not want to  
48 return to his normal schoolwork. The Phase 2 participants all reported that it was an  
49 interesting and fun alternative to normal school tasks. They thought it was good to do the  
50 project during school time because this way they would not miss out on any free time. One of  
51 the participants explained this:  
52  
53  
54  
55  
56

57 *'It was fun because you didn't have to work, and if it hadn't been during school it was*  
58 *inconvenient.'* (Girl, 11 years old)  
59  
60

1  
2  
3  
4  
5 From the adult perspective, time was invested in recruitment, developing material to introduce  
6 and explain the procedure, and thinking about how to best involve children. The actual  
7 analysis with co-researchers was time-intensive and lasted longer than we had expected.  
8  
9 Nevertheless, the time invested was considered reasonable given the empowerment of  
10 children, their learning new skills, and their views on our data provided additional insight,  
11 which is promising for the interpretation of our interviews.  
12  
13  
14  
15  
16

## 17 **DISCUSSION**

18 Little evidence is available on how to involve children in research.[12] In this paper we  
19 describe how we involved relatively young children in the analysis of medical research  
20 interviews analysis using a two-phase approach. We deployed various strategies to avoid a  
21 tokenistic approach, to address challenges regarding time management, and to empower  
22 children during the process.  
23  
24  
25  
26  
27

### 28 **Two-phase approach**

29 Involving relatively young children, aged 10 to 14, in our interview analyses was a  
30 challenging process. Our aim was to limit preselection of data by adults by introducing one-  
31 on-one meetings during which research interviews were analysed by young co-researchers.  
32 This approach could be considered an extension of Best's 'participatory theme elicitation'  
33 method.[20] Even though the sessions lasted longer than originally intended, the fact that we  
34 could focus on one individual worked to our advantage. In our opinion the project benefitted  
35 from the fact that the individual meetings were held at the children's homes, which  
36 constituted a safe and familiar environment. This confirms findings from Dovey-Pearce and  
37 colleagues who highlighted the importance of face-to-face meetings to establish  
38 relationships.[19] The themes identified during Phase 1 were explored in detail during group  
39 meetings in Phase 2. Working with a number of co-researchers in this phase improved the  
40 rigor of the qualitative analysis. In addition, there was an unexpected positive result for the  
41 co-researchers who were classmates. Their bond was strengthened by their shared research  
42 experience and by reflecting on health and illness together. The two-phase approach enabled  
43 us to achieve our research goals and to empower our co-researchers, while keeping within  
44 reasonable the time limits. This applied to adult and child researchers alike.  
45  
46  
47  
48  
49  
50  
51  
52  
53  
54  
55  
56  
57  
58

### 59 **Use of videos in analysis**

1  
2  
3 Our aim was to involve child co-researchers in interview analyses in an effective and efficient  
4 way. Data analysis in qualitative research is often lengthy process involving large quantities  
5 of text. Locock and colleagues reported that young people reading through the transcripts  
6 was tedious and inefficient. They concluded that it was more effective to discuss the data  
7 rather than digging into detailed transcripts.[10] We decided to explore other ways of  
8 involving young co-researchers in interview analyses. Visuals such as photographs, drawings,  
9 or mapping methods are often used in collaborations with young children to collect data about  
10 children's views on, for example, what they value in their lives.[25] Darbyshire and  
11 colleagues reported that using a variety of qualitative visual techniques is helpful for engaging  
12 children in research. It also provides a good way for children to express their views. There is,  
13 however, a problem with using visuals as a participatory method rather than in analysis, as  
14 Darbyshire and colleagues pointed out: '*...having children take photographs and then having*  
15 *only adults "interpret" (or possibly misinterpret) them is potentially an adultist approach to*  
16 *research on children that we sought to avoid.*'[26] For this reason we used videos in the  
17 analysis stage to visualise the interview data to be analysed. Our study confirmed the benefits  
18 expressed by Darbyshire and colleagues. The co-researchers enjoyed the creative process of  
19 developing the mind map and the videos helped them understand and empathise with the  
20 interviewees. Using videos rather than transcripts made the process more time-efficient, while  
21 preserving the effectiveness of a thematic analysis. Another benefit of videos over transcripts  
22 concerned the rigor of the qualitative data analyses. The analysis of interview data is often  
23 assumed to start as soon as the interview has been fully transcribed but, even in case of a  
24 verbatim transcript including descriptions of vocal emotions such as laughter, the loss of key  
25 elements, such as volume of voices and facial expressions, remains. This could present  
26 interviewees' experiences in a more abstract way than the original data show.[27, 28] Put  
27 differently, by using videos we possibly started the analysis with a more authentic  
28 representation of the data.

### Additional considerations and further research

29 Time investment is an important consideration when developing ways of involving children in  
30 research analysis. In the method developed by Best and colleagues the analysis is limited to  
31 two hours. An additional time investment of four times 90 to 120 minutes is asked of  
32 participants for 'capacity building.' In these sessions, young people learn how to design and  
33 conduct a study, how to perform qualitative data analyses, and they receive an introduction  
34 into the subject matter of their data.[20] We purposely did not train our co-researchers to  
35  
36  
37  
38  
39  
40  
41  
42  
43  
44  
45  
46  
47  
48  
49  
50  
51  
52  
53  
54  
55  
56  
57  
58  
59  
60

1  
2  
3 avoid shaping them to comply with our idea of a qualitative researcher, and to limit time  
4 investment. Though we cannot make a comparison, the little training we gave our co-  
5 researchers did not seem to have had a negative impact on the result.  
6  
7  
8  
9

10 In addition to time investment, timing of research meetings should be considered. Many  
11 Young People's Advisory Groups generally plan their meetings during school holidays or  
12 weekends.[29] The INVOLVE Advisory Group of the United Kingdom's National Institute  
13 for Health Research, which supports active public involvement in the National Health  
14 Service, public health, and social care research,[30] identified parents and schools as a  
15 significant barrier to public involvement during school hours: *...lack of schools' recognition*  
16 *of the value of their work sometimes acts as a barrier to them attending events which involve*  
17 *travel in school hours.* [14, p12] Nevertheless, thanks to a cooperative headmaster, we  
18 managed to set up a collaboration with a primary school for Phase 2 of our study, and planned  
19 the group meetings during school hours. For our co-researchers in the group meetings,  
20 participating during school time was preferable to after school, because they reported that  
21 they had busy schedules or had to do homework during their free time.  
22  
23  
24  
25  
26  
27  
28  
29  
30  
31

32 Our results showed that children tend to include more concrete topics in their analyses,  
33 whereas adults analyse data in a more abstract way. This is in line with the cognitive  
34 development of children, who transform from concrete to abstract conceptualisation later in  
35 adolescence.[31, 32] Consequently, we expect that an evaluation of the data analysis process  
36 performed by children, young people, and adults will provide additional interesting insights.  
37 Recently, we started testing our two-phase approach with young people aged 16 to 18. They  
38 will use this project for a school assignment, thereby creating a situation that is mutually  
39 beneficial. If this proves successful, we consider setting up a long-term collaboration with  
40 primary schools and secondary schools to optimise collaboration between researchers and  
41 children to help decrease the knowledge gap between academia and society.  
42  
43  
44  
45  
46  
47  
48  
49  
50

### 51 **Study limitations**

52 To test this new approach we started with a small group of young co-researchers. As a  
53 consequence, we had to select of interviews from a larger dataset to analyse in Phase 1. We  
54 aimed for as much variation as possible within this selection, but we also needed to be  
55 pragmatic, regarding the length of the interviews for instance. In addition, in our method  
56 children were not involved in making choices about specific quotes used in the results  
57  
58  
59  
60

1  
2  
3 sections. As recruiting co-researchers was challenging, sampling was limited to age and to  
4 fluency in the Dutch language. Maximum variation sampling would, however, be preferable  
5 to improve reflexivity.  
6  
7

## 9 **CONCLUSION**

10 We suggest that the two-phase approach to involving young children in analysing qualitative  
11 data is feasible. Its novelty lies in recruiting children to help identify themes from original  
12 data before the themes are explored in detail. Thus preselection of data by adults is limited.  
13  
14 By combining one-on-one meetings and group meetings the two-phase approach is an  
15 effective and efficient way of involving relatively young children in analysing qualitative  
16 data. Additional benefits are that children reflect on health and illness in their own lives, they  
17 are empowered, and engaged in medical research. We recommend presenting the interview  
18 data on videos rather than through transcripts. Videos make it easier for children to  
19 understand the data, to empathise with the interviewees, and it limits time investment.  
20  
21  
22  
23  
24  
25  
26  
27

## 28 **ETHICS APPROVAL**

29 The Medical Ethics Review Board of the University Medical Center Groningen concluded  
30 that neither this study (M18.2334032, 24 July 2018) nor our larger study (M16.192386, 10  
31 May 2016) fall within the scope of the Dutch Medical Research Involving Human Subjects  
32 Act.  
33  
34

## 35 **ACKNOWLEDGEMENTS**

36 We thank all the participants in the original interview study and our co-researcher participants  
37 in this project. Because this is a meta-analysis of the PPI project, we decided not to invite the  
38 co-researchers as co-author of this article. We thank Laura Postma (PPIA2) for helping to  
39 facilitate the group meetings.  
40  
41

## 42 **FUNDING STATEMENT**

43 The PPI study itself was a low-cost project. Data collection for the main interview study was funded by  
44 the University of Groningen as part of the MD/PhD program of Malou Luchtenberg. This funding body  
45 has no role in the design of the study and collection, analysis, or interpretation of data, or in writing the  
46 manuscript.  
47  
48

## 49 **COMPETING INTERESTS STATEMENT**

50 None declared.  
51

## 52 **DATA SHARING STATEMENT**

53 The original dataset with audiotaped and videotaped interviews is not available for the public  
54 on account of privacy concerns.  
55  
56

## 57 **AUTHOR'S CONTRIBUTION**

58 ML, EM and EV designed the original study. ML was responsible for the data collection in  
59 Phase 1 and the group meetings were led by ML (PPIA1). Analysis was performed by ML,  
60

checked by EM, and discussed with EV. ML made the first draft of the article, which was subsequently discussed within the team and reviewed by EM and EV. All authors read and approved the final manuscript.

## REFERENCES

1. World Medical Association. World Medical Association Declaration of Helsinki: ethical principles for medical research involving human subjects. *JAMA* 2013;310(20):2191–4. <https://doi.org/10.1001/jama.2013.281053>
2. Hennink M, Hutter I, Bailey A. The nature of qualitative research. Subjectivity and the need for reflexivity. In: *Qualitative Research Methods*. London: Sage 2011:19-23.
3. Taylor RM, Whelan JS, Gibson F, et al. Involving young people in BRIGHTLIGHT from study inception to secondary data analysis: insights from 10 years of user involvement. *Res Involv Engagem* 2018;4(1):1–14. <https://doi.org/10.1186/s40900-018-0135-x>
4. Jamal F, Langford R, Daniels P, et al. Consulting with young people to inform systematic reviews: an example from a review on the effects of schools on health. *Heal Expect* 2015;18(6):3225–35. <https://doi.org/10.1111/hex.12312>
5. Coad J, Evans R. Reflections on practical approaches to involving children and young people in the data analysis process. *Child Soc* 2008 Jan;22(1):41–52. <https://doi.org/10.1111/j.1099-0860.2006.00062.x>
6. Clavering EK, McLaughlin J. Children’s participation in health research: from objects to agents? *Child Care Health Dev* 2010;36(5):603–11. <https://doi.org/10.1111/j.1365-2214.2010.01094.x>
7. Brady L-M, Preston J. Evaluating the extent and impact of young people’s involvement in National Institute for Health Research (NIHR) studies: an assessment of feasibility. 2017 April. [http://www.invo.org.uk/wp-content/uploads/2017/06/Impact-of-CYPs-involvement\\_JLI\\_GenR.pdf](http://www.invo.org.uk/wp-content/uploads/2017/06/Impact-of-CYPs-involvement_JLI_GenR.pdf) (accessed 01-07-2019)
8. Lundy L, McEvoy L, Byrne B. Working with young children as co-researchers: an approach informed by the United Nations Convention on the Rights of the Child. *Early Educ Dev* 2011;22(5):714–36. <https://doi.org/10.1080/10409289.2011.596463>
9. Holland S, Renold E, Ross NJ, et al. Power, agency and participatory agendas: a critical exploration of young people’s engagement in participative qualitative research. *Childhood* 2010;17(3):360–75. <https://doi.org/10.1177/0907568210369310>
10. Locock L, Kirkpatrick S, Brading L, et al. Involving service users in the qualitative analysis of patient narratives to support healthcare quality improvement. *Res Involv Engagem* 2019;5(1):1–11. <https://doi.org/10.1186/s40900-018-0133-z>
11. INVOLVE. What is public involvement in research? *NHS Natl Inst Heal Res* 2015. <http://www.invo.org.uk/find-out-more/what-is-public-involvement-in-research-2/> (accessed 10-07-2019)
12. Bird D, Culley L, Lakhanpaul M. Why collaborate with children in health research: an analysis of the risks and benefits of collaboration with children. *Arch Dis Child - Educ Pract Ed* 2013;98(2):42–8. <https://doi.org/10.1136/archdischild-2012-303470>
13. Preston J, Stones SR, Davies H, et al. How to involve children and young people in what is, after all, their research. *Arch Dis Child* 2019;104(5):494–500. <https://doi.org/10.1136/archdischild-2018-315118>
14. Sonpal K, Walker E, Swallow V, et al. Report on involving children and young people in research. Southampton: INVOLVE. 2019. <https://www.invo.org.uk/wp-content/uploads/2019/06/77620-YPv3-Booklet-WEB.pdf> (accessed 01-07-2019)
15. Blackburn S, McLachlan S, Jowett S, et al. The extent, quality and impact of patient



- and public involvement in primary care research: a mixed methods study. *Res Involv Engagem* 2018;4(1):1–18. <https://doi.org/10.1186/s40900-018-0100-8>
16. Domecq JP, Prutsky G, Elraiayah T, et al. Patient engagement in research: a systematic review. *BMC Heal Serv Res* 2014;14(89):1–9. <https://doi.org/10.1186/1472-6963-14-89>
17. Kellett M, Forrest R, Dent N, et al. “Just teach us the skills please, we’ll do the rest”: Empowering ten-year-olds as active researchers. *Child Soc* 2004;18(5):329–43. <https://doi.org/10.1002/chi.807>
18. Chappell P, Rule P, Dlamini M, et al. Troubling power dynamics: youth with disabilities as co-researchers in sexuality research in South Africa. *Childhood* 2014;21(3):385–99. <https://doi.org/10.1177/0907568214525427>
19. Dovey-Pearse G, Walker S, Fairgrieve S, et al. The burden of proof: The process of involving young people in research. *Health Expectations* 2019;22:465–474. <https://doi.org/10.1111/hex.12870>
20. Best P, Badham J, Corepal R, et al. Network methods to support user involvement in qualitative data analyses: an introduction to Participatory Theme Elicitation. *Trials* 2017;18(1):1–14. <https://doi.org/10.1186/s13063-017-2289-5>
21. Brederoschool. Academische Basisschool 2019. Groningen, the Netherlands. <https://brederoschool.openbaaronderwijsgroningen.nl/academischebasisschool/index.html> (accessed 09-11-2018)
22. Dutch Medical Research Involving Human Subjects Act (WMO), 26 February 1998. <https://wetten.overheid.nl/BWBR0009408/2019-04-02> (accessed 09-04-2019)
23. Cambridge University Press. Meaning of mind map in English. Cambridge Dictionary. 2019. <https://dictionary.cambridge.org/dictionary/english/mind-map> (accessed 19-09-2019)
24. Smith J, Firth J. Qualitative data analysis: the framework approach. *Nurse Researcher* 2011;18(2):52–62. <https://doi.org/10.7748/nr2011.01.18.2.52.c8284>
25. Coad J. Using art-based techniques in engaging children and young people in health care consultations and/or research. *J Res Nurs* 2007;12(5):487–97. <https://doi.org/10.1177/1744987107081250>
26. Darbyshire P, Macdougall C, Schiller W. Multiple methods in qualitative research with children: more insight or just more? *Qual Res* 2005;5(4):417–436. <https://doi.org/10.1177/1468794105056921>
27. Hewitt J. Ethical components of researcher-researched relationships in qualitative interviewing. *Qual Health Res* 2007;17(8):1149–59. <https://doi.org/10.1177/1049732307308305>
28. Alldred P, Gillies V. Eliciting research accounts: re/producing modern subjects. *Ethics in Qualitative Research*. London: Sage 2002:146–65.
29. Gaillard S, Malik S, Preston J, et al. Involving children and young people in clinical research through the forum of a European Young Persons’ Advisory Group: needs and challenges. *Fundam Clin Pharmacol* 2018 Aug;32(4):357–62. <https://doi.org/10.1111/fcp.12360>
30. National Institute for Health Research. About INVOLVE. <https://www.invo.org.uk/about-involve/> (accessed 04-03-2020)
31. Garrison W, Felice ME. Adolescence. In: Carey WB, Crocker AC, Coleman WL, Elias ER, Feldman HM, eds. *Developmental-Behavioral Pediatrics (Fourth Edition)* 2009:62–73. <https://doi.org/https://doi.org/10.1016/B978-1-4160-3370-7.00006-7>
32. Christie D, Viner R. Adolescent development. *BMJ (Clinical Research Ed.)* 2005;330:301. <https://doi.org/10.1136/bmj.330.7486.301>

1  
2  
3  
4  
5  
6  
7  
8  
9  
10  
11  
12  
13  
14  
15  
16  
17  
18  
19  
20  
21  
22  
23  
24  
25  
26  
27  
28  
29  
30  
31  
32  
33  
34  
35  
36  
37  
38  
39  
40  
41  
42  
43  
44  
45  
46  
47  
48  
49  
50  
51  
52  
53  
54  
55  
56  
57  
58  
59  
60

For peer review only

# BMJ Open

**'I actually felt like I was a researcher myself.'**  
**On Involving Children in the Analysis of Qualitative**  
**Paediatric Research in the Netherlands**

|                                 |                                                                                                                                                                                                                                                                                                                                             |
|---------------------------------|---------------------------------------------------------------------------------------------------------------------------------------------------------------------------------------------------------------------------------------------------------------------------------------------------------------------------------------------|
| Journal:                        | <i>BMJ Open</i>                                                                                                                                                                                                                                                                                                                             |
| Manuscript ID                   | bmjopen-2019-034433.R3                                                                                                                                                                                                                                                                                                                      |
| Article Type:                   | Original research                                                                                                                                                                                                                                                                                                                           |
| Date Submitted by the Author:   | 04-Jun-2020                                                                                                                                                                                                                                                                                                                                 |
| Complete List of Authors:       | Luchtenberg, Malou; University of Groningen; University Medical Center Groningen, Department of Pediatrics<br>Maeckelberghe, Els; University of Groningen, Institute for Medical Education; University Medical Center Groningen<br>Verhagen, Eduard; University of Groningen; University Medical Center Groningen, Department of Pediatrics |
| <b>Primary Subject Heading</b>: | Paediatrics                                                                                                                                                                                                                                                                                                                                 |
| Secondary Subject Heading:      | Ethics, Qualitative research, Research methods                                                                                                                                                                                                                                                                                              |
| Keywords:                       | Involvement, Children, PAEDIATRICS, Patient Participation, Biomedical Research, QUALITATIVE RESEARCH                                                                                                                                                                                                                                        |
|                                 |                                                                                                                                                                                                                                                                                                                                             |

SCHOLARONE™  
 Manuscripts



I, the Submitting Author has the right to grant and does grant on behalf of all authors of the Work (as defined in the below author licence), an exclusive licence and/or a non-exclusive licence for contributions from authors who are: i) UK Crown employees; ii) where BMJ has agreed a CC-BY licence shall apply, and/or iii) in accordance with the terms applicable for US Federal Government officers or employees acting as part of their official duties; on a worldwide, perpetual, irrevocable, royalty-free basis to BMJ Publishing Group Ltd ("BMJ") its licensees and where the relevant Journal is co-owned by BMJ to the co-owners of the Journal, to publish the Work in this journal and any other BMJ products and to exploit all rights, as set out in our [licence](#).

The Submitting Author accepts and understands that any supply made under these terms is made by BMJ to the Submitting Author unless you are acting as an employee on behalf of your employer or a postgraduate student of an affiliated institution which is paying any applicable article publishing charge ("APC") for Open Access articles. Where the Submitting Author wishes to make the Work available on an Open Access basis (and intends to pay the relevant APC), the terms of reuse of such Open Access shall be governed by a Creative Commons licence – details of these licences and which [Creative Commons](#) licence will apply to this Work are set out in our licence referred to above.

Other than as permitted in any relevant BMJ Author's Self Archiving Policies, I confirm this Work has not been accepted for publication elsewhere, is not being considered for publication elsewhere and does not duplicate material already published. I confirm all authors consent to publication of this Work and authorise the granting of this licence.

1  
2  
3 **‘I actually felt like I was a researcher myself.’**

4  
5 **On Involving Children in the Analysis of Qualitative Paediatric Research in**  
6  
7 **the Netherlands**

8  
9 Malou Luchtenberg, Els Maeckelberghe, Eduard Verhagen

10 University of Groningen, University Medical Center Groningen

11  
12  
13  
14  
15 Malou L. Luchtenberg

16 Beatrix Children’s Hospital

17 University of Groningen, University Medical Center Groningen, the Netherlands

18  
19  
20  
21  
22 Els L.M. Maeckelberghe

23 Institute for Medical Education

24 University of Groningen, University Medical Center Groningen, the Netherlands

25  
26  
27  
28 A.A. Eduard Verhagen

29 Beatrix Children’s Hospital

30 University of Groningen, University Medical Center Groningen, the Netherlands

31  
32  
33  
34 **Corresponding author:**

35 Malou L. Luchtenberg

36 PO Box 30 001, 9700 RB Groningen

37 The Netherlands

38 m.l.luchtenberg@umcg.nl

39 +31 6 25 64 96 59

40  
41  
42  
43  
44  
45  
46  
47 Word count: 4304 (excl. title page, abstract, references, tables and quotes)

48  
49  
50 **Keywords:** involvement, children, paediatrics, patient participation, biomedical research,  
51 qualitative research

## ABSTRACT

### Objectives

To evaluate the feasibility of a new approach to paediatric research whereby we involved children in analysing qualitative data, and to reflect on the involvement process.

### Setting

This was a single-centre, qualitative study in the Netherlands. It consisted of research meetings with individual children at home (Phase 1) or group meetings at school (Phase 2). In Phase 1 we identified themes from a video interview during five one-on-one meetings between a child co-researcher and the adult researcher. In Phase 2, during two group meetings, we explored the themes in detail using fragments from 16 interviews.

### Participants

We involved 14 school children (aged 10 to 14) as co-researchers to analyse children's interviews about their experience while participating in medical research. Notes were taken, and children provided feedback. A thematic analysis was performed using a framework approach.

### Results

All co-researchers identified themes. The time needed to complete the task varied, as did the extent to which the meetings needed to be structured to improve concentration. The children rated time investment as adequate and they considered acting as co-researcher interesting and fun, adding that they had learnt new skills and gained new knowledge. The experience also led them to reflect on health matters in their own lives. The adult researchers considered the process relatively time intensive, but the project did result in a more critical assessment of their own work.

### Conclusion

The new, two-phase approach of involving children to help analyse qualitative data is a feasible research method. The novelty lies in involving children to help identify themes from original interview data, thereby limiting preselection of data by adults, before exploring these themes in detail. Videos make it easier for children to understand the data and to empathise with the interviewees, and limits time investment.

## STRENGTHS AND LIMITATIONS OF THIS STUDY

- This study describes a new approach to paediatric research whereby children are involved in analysing qualitative interview data.
- The novelty of this study lies in the fact that children are involved in helping to identify themes from original data as well as exploring the themes in more detail.
- This study explores the use of videos rather than transcripts to present the interviews to relatively young co-researchers.
- The study reflects on children's involvement as co-researchers from the perspective of the children themselves and from that of the adult researchers.
- A limitation of this study is that in test phase presented here we limited the number of child co-researchers and selected the interviews from a larger dataset to include as much variation as possible.

## INTRODUCTION

1  
2  
3  
4  
5  
6 Researchers should be wary of interpretation bias when analysing data of qualitative studies.  
7 Qualitative research includes a subjective component that calls for reflexivity.[1] Because the  
8 life experiences and social situations of children differ from those of adults, their  
9 interpretations of data derived from interviews with children may differ from adults'  
10 interpretations. It is therefore desirable to involve children to strengthen the analysis of such  
11 qualitative data. There is little evidence in the literature on how children could be effectively  
12 involved in scientific data analysis.[2–9] Other challenges regarding patient and public  
13 involvement (PPI) [10] of children include lack of funding and lack of time, gatekeeping or  
14 power imbalances, and concerns about obtaining knowledge and training on how to involve  
15 children.[2,5,11–17] Measuring the impact of a PPI process on research output is difficult  
16 because the involvement process itself is complex and therefore its impact cannot be fully  
17 captured by evaluating outcomes.[18]  
18  
19  
20  
21  
22  
23  
24  
25  
26  
27

28 Best and colleagues recently introduced a new method called participatory theme elicitation,  
29 whereby a youth advisory panel is involved in qualitative data analysis. The method involves  
30 capacity building (training), data selection by adult researchers, data sorting by youth  
31 members, and final grouping and analysis by adult researchers.[19] A disadvantage of the  
32 method is that it involves data preselection by adults. We hypothesise that it is feasible to  
33 involve children from the beginning of data analysis, starting with the identification of themes  
34 from original data.  
35  
36  
37  
38  
39  
40  
41

42 In a larger unpublished study, we collected the experiences of young people regarding their  
43 participation in medical research in order to provide recommendations for improving  
44 children's participation in research. In the present study, we aimed to explore whether it is  
45 feasible to involve children in the analysis of the qualitative data. We designed a two-phase  
46 approach that would be effective and efficient: effective in the sense that it involved children  
47 to identify themes as well as to explore the themes in more detail and efficient in the sense of  
48 limiting time investment. We also aimed to reflect on the involvement process from the  
49 perspective of both adults and children. The results of the qualitative data analysis are to be  
50 published elsewhere.  
51  
52  
53  
54  
55  
56  
57  
58  
59  
60

## **METHODS**

This was a single-centre study performed by researchers of University Medical Center Groningen, the Netherlands. We investigated the involvement of children as co-researchers in identifying and analysing themes from interview data presented on video. We conducted the investigation in two phases: Phase 1 consisted of five individual meetings, and Phase 2 of two group meetings. In addition, we reflected on the children's involvement in the analysis process.

### **Recruitment and sampling**

#### **Phase 1**

We approached potential co-researchers through national patient support organizations, primary schools, hospitals, social media, and by word-of-mouth. No research experience was required of the participants. Sampling was based on age (9-18 years) and participants were required to be fluent in Dutch because the meetings were held in that language. Initially, seven children volunteered. They each received an information leaflet. Even though recruitment was challenging we managed to achieve our goal of five participants in Phase 1.

#### **Phase 2**

We recruited the participants for Phase 2 in collaboration with a specific primary school in Groningen, the Netherlands, where teachers and learners are expected to display an academic mind-set aimed at research and analysis.[20] We invited one class of 15 children of the school's oldest learners to participate. Ten learners volunteered, one of whom was unable to participate because of illness.

### **Informed consent**

#### **Phase 1**

We supplied the potential participants with verbal and written information. We asked them to discuss the study with their parents and to reply by post, e-mail or by telephone. Before the session at the child's home started, he or she read the informed consent form and discussed it with the researcher and a parent. One parent was present throughout the session, but was kindly asked to not interfere with the process. All the children, irrespective of age, were asked to sign the informed consent form to acknowledge that we appreciated their contribution equally. In accordance with the Dutch Medical Research Involving Human Subjects Act, parental consent was obtained in addition to the child's consent.[21] Children were also asked to sign a confidentiality agreement regarding any personal information present in the data



they analysed. At the end of the session we gave the participants a €10 gift voucher as token of our appreciation of their time and a certificate acknowledging their contribution as co-researchers.

## Phase 2

Two adult researchers visited the primary school to meet the learners, their teacher and headmaster, and to introduce the research project. The headmaster agreed to allow the children to participate during school hours. The potential participants received an information leaflet similar to the one given to the participants of Phase 1. We asked them to complete the consent form and the confidentiality agreement at home with a parent, and to return the form to their teacher. At the end of the group meetings we gave the participants a certificate. These children were not given a gift voucher because they participated during school hours.

### Data characteristics

Data from the original interview study were analysed by our co-researchers. In addition, the adult researchers took notes during the analyses and written feedback was obtained from the participants before, during, and after participating. In Table 1 we provide additional information on the data collected for the original interview study. Out of a total of 23 interviews two were excluded because they were not videotaped. Another five were excluded because participants and parents had not consented to use the video data.

*Table 1. Details of data of the original interview study on children's experiences in medical research*

| Study characteristics            |                                                                                                                                                                                                                                                                                                                                                                                                                                                                                   |
|----------------------------------|-----------------------------------------------------------------------------------------------------------------------------------------------------------------------------------------------------------------------------------------------------------------------------------------------------------------------------------------------------------------------------------------------------------------------------------------------------------------------------------|
| <b>Aim</b>                       | To explore children's experiences in medical research to obtain recommendations from their perspectives on how to improve children's involvement in research.                                                                                                                                                                                                                                                                                                                     |
| <b>Setting and research team</b> | Single-centre study conducted by a team of researchers at University Medical Center Groningen, the Netherlands. The research team consisted of an ethicist (EM), paediatrician (EV), and MD/PhD student (ML). All members were trained researchers and/or had previous experience in conducting qualitative research.                                                                                                                                                             |
| <b>Recruitment and sampling</b>  | Recruitment through health providers from several hospitals, national patient support groups, social media, and by word-of-mouth. Purposive maximum variation sample: children, patients as well as healthy volunteers between 9 and 18 years old who were invited to participate in different types of medical research in the Netherlands and who either took part or declined to take part. The participants had no prior relationships with the members of the research team. |
| <b>Informed consent</b>          | Informed consent given by one parent and the child or, in accordance to Dutch law, from 16 years and older by the child only.                                                                                                                                                                                                                                                                                                                                                     |

|                         |                                                                                                                                                                                                                                                                                                                                                                                                                                                                                                                                                                                                                                                          |
|-------------------------|----------------------------------------------------------------------------------------------------------------------------------------------------------------------------------------------------------------------------------------------------------------------------------------------------------------------------------------------------------------------------------------------------------------------------------------------------------------------------------------------------------------------------------------------------------------------------------------------------------------------------------------------------------|
| <b>Data collection</b>  | Twenty three semi-structured, in-depth interviews, lasting between 30 and 100 minutes, with children about their experiences in taking part in medical research, including recommendations for improvement of children's involvement in informed consent procedures and the research itself. A topic guide was developed based on a previous study in the United Kingdom. Interviews performed by ML took place at children's homes and were recorded on audio or video, transcribed verbatim, and returned to the participants. No comments from participants were received. Data collection continued until we reached data saturation of main themes. |
| <b>Ethical approval</b> | The conclusion of the Medical Ethics Review Board of the University Medical Center Groningen was that this study, no. M16.192386, 10 May 2016 fell beyond the scope of the Dutch Medical Research Involving Human Subjects Act .                                                                                                                                                                                                                                                                                                                                                                                                                         |

The co-researchers received a brief interactive introduction to paediatric research and to the original interview study. They were asked to identify the main topics in video interviews and to summarise them on mind maps (*A type of diagram with lines and circles for organising information so that it is easier to use or remember*).[22, p1] To prevent the children from becoming 'little adult researchers' we did not train them extensively. Extensive training would also have been more time consuming for both the children and the researchers.

In Phase 1 the five co-researchers collaborated with the coordinating researcher (PPIA1 – PPI adult researcher 1) in a one-on-one session to identify the main themes in five different interviews. Together they watched a video of between 25 to 45 minutes of another young person and discussed the emerging themes. This took place at the participants' home and lasted between two and three and a half hours. During Phase 1 the adult researcher spent a total of eleven hours travelling to and from co-researchers homes.

During the two group meetings in Phase 2, we explored in detail two themes that had been identified during Phase 1. For this purpose we compiled two five-minute videos from fragments of several interviews from the dataset of the original study. The group meetings took place at a local primary school and lasted approximately two and a half hours. Travelling time for adult researchers was two hours, including the introductory meeting when we handed out the information sheets. In addition to travelling time, the time investment of adult researchers was approximately five hours. This included the time spent preparing the instructions and making the compilation videos. The material costs of the project were low and the travelling costs minimal.

The aim of the analysis process in both phases was to identify the main themes in the video through open, unstructured discussions with the child co-researchers. To facilitate interaction and discussion the co-researchers and the adult researchers could pause the video at any time. They took notes of what they thought the interviewee found important. PPIA1 and PPIA2 allowed moments of personal reflection, but were on guard for potential intertwining of co-researchers' personal experiences with interviewees' experiences. After watching the video the co-researchers drew a mind map depicting their interpretation of the connection between different themes.[22] The mind maps were drawn on A3-sized sheets of paper, using different sizes of sticky notes, and coloured pens. Besides, the participants were free to use materials of their own choice. The researcher asked the participants questions about the importance of certain themes, the identification of overlapping themes, and the reason why they had chosen a certain theme. The participants led the discussion and made the final decision in case of a disagreement about a theme.

### **Data collection and analysis**

Before the study actually commenced, we asked the child co-researchers why they would like to take part. The adult researchers took notes of how participants fulfilled their role as co-researcher, and how the participants reflected on this process. Child co-researchers completed a feedback form after the analysis (Table 2). In addition, we briefly evaluated the process orally. All meetings were recorded on audio tape.

We performed a thematic analysis using a framework approach.[23] Familiarisation and initial theme identification was done by PPIA1 (ML) and discussed with EM (individual meetings) and PPIA2 (group meetings) based on the audio tape, notes, and the participants' written feedback. Some themes, such as time investment, were identified in advance from the literature, others were derived from the data. Themes were refined and conceptualised during regular meetings with the research team and any disagreements were discussed and a final decision reached by consensus. Because the sample for this exploratory study was relatively small, we did not aim for data saturation.

*Table 2. Feedback form*

|                                                                                           |                                                                             |
|-------------------------------------------------------------------------------------------|-----------------------------------------------------------------------------|
| 1. Did you understand beforehand what your role was in the project? (No / a little / yes) | 6. Would you recommend other children to become co-researchers? Why?        |
| 2. How could we improve the information about working as a co-researcher?                 | 7. How would you rate your time investment? (Too long, adequate, too short) |

|                                                                                                            |                                                                                                                                                                 |
|------------------------------------------------------------------------------------------------------------|-----------------------------------------------------------------------------------------------------------------------------------------------------------------|
| 3. What was it like for you to work as a co-researcher?<br>a. positive aspects<br>b. points of improvement | 8. a. What did you think of the EUR 10 gift voucher? (Phase 1)<br>b. What did you think about participating in this project during school hours? Why? (Phase 2) |
| 4. Did you learn anything from being a co-researcher? If so, what did you learn?                           | 9. Do you have suggestions for improving this evaluation form?                                                                                                  |
| 5. Would you like to be a co-researcher more often?                                                        |                                                                                                                                                                 |

## Patient and public involvement

We explored the feasibility of an approach whereby children were involved in qualitative data analysis, both in helping adult researchers to identify themes from original data as in exploring the themes in more detail.

## RESULTS

### Participant characteristics

Fourteen children, eight girls and six boys, participated as co-researchers in this study. Two participants had experience because they had been chronic patients themselves. None of the children had been a co-researcher before. Tables 3 and 4 show the characteristics of the child and adult participants.

Table 3. Child participant characteristics

| Characteristics of child co-researchers               | N* (%)** |
|-------------------------------------------------------|----------|
| <i>Sex</i>                                            |          |
| Girl                                                  | 8 (57)   |
| Boy                                                   | 6 (43)   |
| <i>Age</i>                                            |          |
| 10 years                                              | 1 (7)    |
| 11 years                                              | 10 (71)  |
| 12 years                                              | 2 (14)   |
| 13 years                                              | 0 (0)    |
| 14 years                                              | 1 (7)    |
| <i>School attended</i>                                |          |
| Primary School                                        | 13 (93)  |
| Secondary School                                      | 1 (7)    |
| <i>Hospital/Disease experience (lived experience)</i> |          |
| Currently suffering from a disease                    | 2 (14)   |
| Hospitalization or minor surgery in the past          | 6 (43)   |
| Family member(s) who suffer from a disease            | 2 (14)   |
| None                                                  | 4 (29)   |
| <i>Research experience as participant</i>             |          |
| Yes                                                   | 2 (14)   |
| No                                                    | 12 (86)  |
| <i>Experience as co-researcher</i>                    |          |
| Yes                                                   | 0 (0)    |
| No                                                    | 14 (100) |

\* Number of child participants; N = 14

\*\* Rounded to nearest whole number

Table 4. Adult participants characteristics

| Participant | Age | Sex   | Experience illness /hospital                                      | Research experience (participating in research)                 | Research experience (performing research)                       |
|-------------|-----|-------|-------------------------------------------------------------------|-----------------------------------------------------------------|-----------------------------------------------------------------|
| PPIA1       | 27  | Woman | As a medical student. Graduated as medical doctor in August 2019. | Yes. Participant in two large cohort studies for several years. | Training and experience in qualitative research for PhD.        |
| PPIA2       | 23  | Woman | As a medical student. Started internships in September 2019.      | No previous experience in medical research participation.       | Trained in qualitative research as a former psychology student. |

### Reflection and evaluation of the involvement process

The results can be divided into five main themes: (1) understanding the study procedures, (2) empowerment, (3) reflection on health and illness, (4) interest in the bigger picture, and (5) reflection on time investment. The results of the feedback form are summarised in Table 5.

Table 5. Summary of written feedback

| Theme (question from Table 2)                          | Summary of written feedback                                                     | N* (%)** |
|--------------------------------------------------------|---------------------------------------------------------------------------------|----------|
| <b>Understanding the study procedures</b><br>(1,2,9)   | <i>Understanding their role as co-researcher before start***</i>                |          |
|                                                        | No                                                                              | 0 (0)    |
|                                                        | A little                                                                        | 12 (86)  |
|                                                        | Yes                                                                             | 2 (14)   |
| <b>Empowerment</b><br>(3-6)                            | <i>Suggestions for improving the information about working as co-researcher</i> |          |
|                                                        | Don't know                                                                      | 4 (29)   |
|                                                        | Everything was clear                                                            | 5 (36)   |
|                                                        | Use fewer difficult words                                                       | 4 (29)   |
|                                                        | Explain that we had to take notes and create a mind map                         | 1 (7)    |
|                                                        | <i>Suggestions for improving the feedback form of the co-researcher project</i> |          |
|                                                        | Adding a question about the overall experience                                  | 1 (7)    |
|                                                        | No recommendations                                                              | 13 (93)  |
|                                                        | <i>Positive experience as co-researcher</i>                                     |          |
|                                                        | Fun                                                                             | 14 (100) |
| Interesting                                            | 4 (29)                                                                          |          |
| Helping other children                                 | 1 (7)                                                                           |          |
| Learning something new                                 | 1 (7)                                                                           |          |
| Time investment was okay                               | 2 (14)                                                                          |          |
| Receiving a certificate                                | 1 (7)                                                                           |          |
| <i>Points of improvement for co-researcher project</i> | No points of improvement                                                        | 12 (86)  |
|                                                        | Shorter interviews                                                              | 1 (7)    |
|                                                        | The project should take the whole school day (instead of a half one)            | 1 (7)    |
| <i>Lessons learnt from being a co-researcher</i>       | Taking notes                                                                    | 2 (14)   |
|                                                        | Critical thinking and listening                                                 | 4 (29)   |

|                                  |                                                                              |         |
|----------------------------------|------------------------------------------------------------------------------|---------|
|                                  | About a medical condition                                                    | 2 (14)  |
|                                  | About doing research                                                         | 2 (14)  |
|                                  | About how children think and feel about research                             | 2 (14)  |
|                                  | That children think differently from adults                                  | 1 (7)   |
|                                  | That it is fun and that you learn a lot                                      | 1 (7)   |
|                                  | Not really                                                                   | 1 (7)   |
|                                  | <i>Would like to be co-researcher more often including reason</i>            |         |
|                                  | Yes, because it's fun                                                        | 12 (86) |
|                                  | Yes, because it's interesting                                                | 5 (36)  |
|                                  | Yes, because I like to help people                                           | 1 (7)   |
|                                  | Yes, I know what to expect now                                               | 1 (7)   |
|                                  | Yes, if it doesn't hurt                                                      | 1 (7)   |
|                                  | It is fun, but depends on how much time I have                               | 1 (7)   |
|                                  | <i>Would you recommend others to become co-researcher?</i>                   |         |
|                                  | Yes, because it's (super) fun                                                | 9 (64)  |
|                                  | Yes, because it's interesting/you learn something from it                    | 7 (50)  |
|                                  | Yes, because you receive a gift voucher                                      | 1 (7)   |
|                                  | Yes, because you can help other people                                       | 2 (14)  |
|                                  | Yes, because you get sweets                                                  | 1 (7)   |
|                                  | Yes, but it depends on whether it suits them                                 | 1 (7)   |
| <b>Time investment</b><br>(7,8b) | <i>Rating of time investment***</i>                                          |         |
|                                  | Too long                                                                     | 1 (7)   |
|                                  | Adequate                                                                     | 12 (86) |
|                                  | Too short                                                                    | 1 (7)   |
|                                  | <i>Thoughts on having this project during school time (Phase 2, n=9)****</i> |         |
|                                  | Fun/good, because you didn't have to do schoolwork                           | 6 (67)  |
|                                  | Fun/good, because you don't miss free time after school                      | 4 (44)  |
|                                  | Don't mind                                                                   | 1 (11)  |
| <b>Compensation</b><br>(8b)      | <i>Thoughts on receiving a gift voucher (Phase 1, n=5)****</i>               |         |
|                                  | Fun/good                                                                     | 5 (100) |
|                                  | Not necessary                                                                | 2 (40)  |
|                                  | Creative                                                                     | 1 (20)  |

\* Number of child participants; N = 14. Some participants provided more than one answer

\*\* Rounded to nearest whole number

\*\*\* The feedback provided is based on a multiple choice question

\*\*\*\* Calculation based on a sub-selection of total participants, because children took part in a different phase

## 1. Understanding of study procedures

When we asked the participants in the group meetings what they expected of the session, they remembered that the main idea was 'doing research about research.' Nonetheless, not everyone remembered the details such as whether photographs would be taken. Even though the information was especially written with children in mind, the participants recalled that it was mostly read and signed by their parents, and had not always been discussed with them. In the case of the co-researchers in the individual meetings this was different. Here the researcher and the parents were present and encouraged the children to complete the form themselves. Parents were available in the background in case their help was needed. Most children reported that they had a general idea about what their role was in the project. We explained their role to them in detail during the actual project. One of them explained:

1  
2  
3 *'I already understood it but once you are doing it you understand it [better].'* (Girl,  
4 age 10-11 years old, individual meeting)  
5  
6

## 7 8 **2. Empowerment** 9

10 By involving children as co-researchers they gained knowledge, they learnt new skills, and  
11 they became more confident in fulfilling their role during the analysis process. This was  
12 mostly because they enjoyed the new experience of contributing to research or helping others.  
13 Children felt empowered by working as a co-researcher. One of them explained it as:  
14  
15

16  
17  
18 *'It actually felt a bit like I was a researcher myself.'* (Girl, age 10-11 years old, group  
19 meeting)  
20  
21

22  
23 They reported gaining new knowledge about certain health matters and they realised what it is  
24 like to be ill. They learnt how to do research, how to think critically, and how to take notes.  
25 Here are some representative answers given:  
26  
27

28  
29  
30  
31 *'You have to think carefully before you draw conclusions.'* (Boy, age 10-11 years old,  
32 group meeting)  
33  
34

35  
36 *'A bit about how ill children felt afterwards [after participating in research].'* (Girl,  
37 age 10-11 years old, group meeting)  
38  
39

40  
41 All the participants were positive about the idea of being a co-researcher more often, mostly  
42 for similar reasons as for wanting to take part in the first place:  
43  
44

45  
46 *'Yes, it was fun, relaxed, and instructive.'* (Girl, age 10-11 years old, group meeting)  
47  
48

49  
50 One participant, the only one attending secondary school, mentioned it would depend on  
51 whether he had the time to take part because of homework and sports activities in his free  
52 time. All participants reported that they would recommend others to become co-researchers,  
53 though one participant acknowledged that it might not suit everyone. She mentioned that  
54 some children might not enjoy it or might not have the skills to do such work.  
55  
56  
57  
58  
59  
60

1  
2  
3 During the analysis process in Phase 1, the co-researchers grew noticeably more confident as  
4 time progressed. The adult researcher retreated to the background and stimulated the co-  
5 researchers to take the lead, which most of them did eventually. One participants actually  
6 asked the researcher questions about her observations, instead of the other way around. Most  
7 participants, however, needed some form of structuring support from the adult researcher  
8 throughout.

9  
10  
11  
12  
13  
14  
15 During the group meetings the support needed from the adult researcher was different. The  
16 co-researchers needed more structuring because of group dynamics. Confusion due to  
17 competing voices ensued, and shyer children tended to not be heard. Interestingly, the two  
18 groups chose different ways of translating their notes to the mind map. In one group the adult  
19 researcher noticed a clear distinction in participants' role preferences, and the co-researchers  
20 divided the roles between themselves. Some preferred an executive role, such as writing down  
21 themes on the 'sticky notes', while others preferred to simply express their ideas and to play a  
22 more coordinating role. Some found it difficult to summarise their notes and suggested first  
23 underlining important notes:

24  
25  
26  
27  
28  
29  
30  
31  
32 *'We could also just first underline what we think is important.'* (Girl, age 10-11 years  
33 old, group meeting)

34  
35  
36  
37 The co-researchers in the other group together decided that they all wanted to write down  
38 their own notes on 'sticky notes' and to put them all on the mind map. The outcome was a  
39 mind map that displayed different topics as well as providing insight into how important the  
40 individuals thought a certain topic was by the number of 'sticky notes' on the same topic.  
41 Others only needed a bit more time and space to find their own role.

42  
43  
44  
45  
46  
47  
48 It was challenging for the adult researchers to not provide answers themselves when the  
49 participants indicated that they did not know how to proceed with the analysis. By repeating  
50 or rephrasing their question and by acknowledging that they were doing the right thing, the  
51 adult researcher could reinforce the children. Both adult researchers were surprised by the co-  
52 researcher's achievements. Throughout the project the co-researchers displayed the ability to  
53 identify themes and to visualise them in mind maps, underlining the feasibility of this  
54 approach and its value for interpreting data.



1  
2  
3 The researchers learnt a great deal from involving children in the analyses because the  
4 participants were very open and direct in their feedback. If they did not understand something,  
5 for example, if a question was not clearly formulated, or if they did not understand medical  
6 jargon such as ‘treatment protocol’, they said so immediately.  
7  
8  
9

10  
11 Whereas the adult researchers tended to generalise findings, the co-researchers stuck more to  
12 the original data. One topic, for example, dealt with recommendations to researchers for  
13 improving young people’s experiences when participation in medical research. The  
14 interviewees mentioned issues like making hospital visits more enjoyable and gave concrete  
15 suggestions. All the researchers, adults and children alike, started from the original data, but  
16 there appeared to be a difference in analysis. The concrete suggestions in the children’s  
17 analyses remained and made their recommendations were therefore emphasised, while the  
18 adults generalised them into ‘ways to brighten up the visits’. The co-researchers brought the  
19 adults back to the basics that were important to children.  
20  
21  
22  
23  
24  
25  
26  
27  
28

### 29 **3. Reflection on health and illness**

30 The participants empathised with the young people who shared their experiences in the video.  
31 They wondered whether they were still ill or asked if they still lived and hoped they were all  
32 right. The following is a representative example:  
33  
34  
35  
36

37 *‘None of these children [in the video] is deadly ill, right?’* (Girl, age 10-11 years old,  
38 group meeting)  
39  
40  
41

42 The adult researcher explained the different illnesses the interviewees had, and mentioned that  
43 some of them had been critically ill, for example, with leukaemia, but that they were stable at  
44 the time they were interviewed.  
45  
46  
47  
48

49 The co-researchers asked questions about the illnesses and what the consequences might be  
50 for the lives of the children such as two siblings with a hereditary condition. They also shared  
51 their own experiences, for example, about relatives who had cancer.  
52  
53  
54  
55

### 56 **4. Interest in the bigger picture**

57 Even though we only involved the participants in the analysis stage of the main interview  
58 study, they were well aware that this was part of a bigger study. They asked about the other  
59  
60

1  
2  
3 participants and previous experiences with involving children in research analysis, and  
4 wondered whether we would show the mind maps they had made to the interviewees.  
5  
6 Some of the questions they asked were:  
7  
8  
9

10 *'Have you been to children's homes?'* *'Are you also doing this [project] at other*  
11 *schools?'* *'How many times have you done this?'* (Several co-researchers, boys and  
12 girls, age 10-14 years old, group meetings, not clearly identifiable from the audio)  
13  
14  
15  
16

17 Hearing that they were the first group of children that participated as co-researchers in this  
18 project made them feel special. They expressed the wish to receive the final results and hoped  
19 we would do this project again. The co-researchers had a broader interest than just fulfilling  
20 their role as co-researchers. They also asked personal questions, such as why the adult  
21 researchers did this research project and whether it was part of their university training. They  
22 also acknowledged and enjoyed helping the adult researchers with their research:  
23  
24  
25  
26  
27  
28

29 *'It is, of course, good for you [adult researchers] that we participate so that you can*  
30 *continue doing research about research of the research.'* (Girl, 10-11 years old, group  
31 meeting)  
32  
33  
34  
35

### 36 **5. Reflection on time investment**

37 Most children said the time investment was appropriate. One child in the group meetings  
38 reported that a shorter meeting would have been better because some children became  
39 distracted:  
40  
41  
42  
43

44 *'Because at the end we were chatting a bit, [we got] distracted.'* (Boy, age 10-11 years  
45 old, group meeting)  
46  
47  
48

49 This was also observed by the adult researchers. Another participant, however, reported that  
50 he would have liked the session to last longer because he really liked it and did not want to  
51 return to his normal schoolwork. The Phase 2 participants all reported that it was an  
52 interesting and fun alternative to normal school tasks. They thought it was good to do the  
53 project during school time because this way they would not miss out on any free time. One of  
54 the participants explained this:  
55  
56  
57  
58  
59  
60

1  
2  
3 *'It was fun because you didn't have to work, and if it hadn't been during school it was*  
4 *inconvenient.'* (Girl, age 10-11 years old, group meeting)  
5  
6  
7

8 From the adult perspective, time was invested in recruitment, developing material to introduce  
9 and explain the procedure, and thinking about how to best involve children. The actual  
10 analysis with co-researchers was time-intensive and lasted longer than we had expected.  
11 Nevertheless, the time invested was considered reasonable given the empowerment of  
12 children, their learning new skills, and their views on our data provided additional insight,  
13 which is promising for the interpretation of our interviews.  
14  
15  
16  
17  
18

## 19 20 **DISCUSSION**

21 Little evidence is available on how to involve children in research.[11] In this paper we  
22 describe how we involved relatively young children in the analysis of medical research  
23 interviews analysis using a two-phase approach. We deployed various strategies to avoid a  
24 tokenistic approach, to address challenges regarding time management, and to empower  
25 children during the process.  
26  
27  
28  
29

### 30 31 **Two-phase approach**

32 Involving relatively young children, aged 10 to 14, in our interview analyses was a  
33 challenging process. Our aim was to limit preselection of data by adults by introducing one-  
34 on-one meetings during which research interviews were analysed by young co-researchers.  
35 This approach could be considered an extension of Best's 'participatory theme elicitation'  
36 method.[19] Even though the sessions lasted longer than originally intended, the fact that we  
37 could focus on one individual worked to our advantage. In our opinion the project benefitted  
38 from the fact that the individual meetings were held at the children's homes, which  
39 constituted a safe and familiar environment. This confirms findings from Dovey-Pearce and  
40 colleagues who highlighted the importance of face-to-face meetings to establish  
41 relationships.[18] The themes identified during Phase 1 were explored in detail during group  
42 meetings in Phase 2. Working with a number of co-researchers in this phase improved the  
43 rigor of the qualitative analysis. In addition, there was an unexpected positive result for the  
44 co-researchers who were classmates. Their bond was strengthened by their shared research  
45 experience and by reflecting on health and illness together. The two-phase approach enabled  
46 us to achieve our research goals and to empower our co-researchers, while keeping within  
47 reasonable the time limits. This applied to adult and child researchers alike.  
48  
49  
50  
51  
52  
53  
54  
55  
56  
57  
58  
59  
60

### **Use of videos in analysis**

Our aim was to involve child co-researchers in interview analyses in an effective and efficient way. Data analysis in qualitative research is often lengthy process involving large quantities of text. Locock and colleagues reported that young people reading through the transcripts was tedious and inefficient. They concluded that it was more effective to discuss the data rather than digging into detailed transcripts.[9] We decided to explore other ways of involving young co-researchers in interview analyses. Visuals such as photographs, drawings, or mapping methods are often used in collaborations with young children to collect data about children's views on, for example, what they value in their lives.[24] Darbyshire and colleagues reported that using a variety of qualitative visual techniques is helpful for engaging children in research. It also provides a good way for children to express their views. There is, however, a problem with using visuals as a participatory method rather than in analysis, as Darbyshire and colleagues pointed out: *'...having children take photographs and then having only adults "interpret" (or possibly misinterpret) them is potentially an adultist approach to research on children that we sought to avoid.'*[25] For this reason we used videos in the analysis stage to visualise the interview data to be analysed. Our study confirmed the benefits expressed by Darbyshire and colleagues. The co-researchers enjoyed the creative process of developing the mind map and the videos helped them understand and empathise with the interviewees. Using videos rather than transcripts made the process more time-efficient, while preserving the effectiveness of a thematic analysis. Another benefit of videos over transcripts concerned the rigor of the qualitative data analyses. The analysis of interview data is often assumed to start as soon as the interview has been fully transcribed but, even in case of a verbatim transcript including descriptions of vocal emotions such as laughter, the loss of key elements, such as volume of voices and facial expressions, remains. This could present interviewees' experiences in a more abstract way than the original data show.[26, 27] Put differently, by using videos we possibly started the analysis with a more authentic representation of the data.

### **Additional considerations and further research**

Time investment is an important consideration when developing ways of involving children in research analysis. In the method developed by Best and colleagues the analysis is limited to two hours. An additional time investment of four times 90 to 120 minutes is asked of participants for 'capacity building.' In these sessions, young people learn how to design and

1  
2  
3 conduct a study, how to perform qualitative data analyses, and they receive an introduction  
4 into the subject matter of their data.[19] We purposely did not train our co-researchers to  
5 avoid shaping them to comply with our idea of a qualitative researcher, and to limit time  
6 investment. Though we cannot make a comparison, the little training we gave our co-  
7 researchers did not seem to have had a negative impact on the result.  
8  
9  
10  
11

12  
13 In addition to time investment, timing of research meetings should be considered. Many  
14 Young People's Advisory Groups generally plan their meetings during school holidays or  
15 weekends.[28] The INVOLVE Advisory Group of the United Kingdom's National Institute  
16 for Health Research, which supports active public involvement in the National Health  
17 Service, public health, and social care research,[29] identified parents and schools as a  
18 significant barrier to public involvement during school hours: *...lack of schools' recognition*  
19 *of the value of their work sometimes acts as a barrier to them attending events which involve*  
20 *travel in school hours.*[13, p12] Nevertheless, thanks to a cooperative headmaster, we  
21 managed to set up a collaboration with a primary school for Phase 2 of our study, and planned  
22 the group meetings during school hours. For our co-researchers in the group meetings,  
23 participating during school time was preferable to after school, because they reported that  
24 they had busy schedules or had to do homework during their free time.  
25  
26  
27  
28  
29  
30  
31  
32  
33  
34  
35

36 Our results showed that children tend to include more concrete topics in their analyses,  
37 whereas adults analyse data in a more abstract way. This is in line with the cognitive  
38 development of children, who transform from concrete to abstract conceptualisation later in  
39 adolescence.[30, 31] Consequently, we expect that an evaluation of the data analysis process  
40 performed by children, young people, and adults will provide additional interesting insights.  
41 Recently, we started testing our two-phase approach with young people aged 16 to 18. They  
42 will use this project for a school assignment, thereby creating a situation that is mutually  
43 beneficial. If this proves successful, we consider setting up a long-term collaboration with  
44 primary schools and secondary schools to optimise collaboration between researchers and  
45 children to help decrease the knowledge gap between academia and society.  
46  
47  
48  
49  
50  
51  
52  
53  
54

### 55 **Study limitations**

56 To test this new approach we started with a small group of young co-researchers. As a  
57 consequence, we had to select of interviews from a larger dataset to analyse in Phase 1. We  
58 aimed for as much variation as possible within this selection, but we also needed to be  
59  
60

1  
2  
3 pragmatic, regarding the length of the interviews for instance. In addition, in our method  
4 children were not involved in making choices about specific quotes used in the results  
5 sections. As recruiting co-researchers was challenging, sampling was limited to age and to  
6 fluency in the Dutch language. Maximum variation sampling would, however, be preferable  
7 to improve reflexivity.  
8  
9  
10  
11  
12

### 13 **CONCLUSION**

14 We suggest that the two-phase approach to involving young children in analysing qualitative  
15 data is feasible. Its novelty lies in recruiting children to help identify themes from original  
16 data before the themes are explored in detail. Thus preselection of data by adults is limited.  
17 By combining one-on-one meetings and group meetings the two-phase approach is an  
18 effective and efficient way of involving relatively young children in analysing qualitative  
19 data. Additional benefits are that children reflect on health and illness in their own lives, they  
20 are empowered, and engaged in medical research. We recommend presenting the interview  
21 data on videos rather than through transcripts. Videos make it easier for children to  
22 understand the data, to empathise with the interviewees, and it limits time investment.  
23  
24  
25  
26  
27  
28  
29  
30  
31

### 32 **ETHICS APPROVAL**

33 The Medical Ethics Review Board of the University Medical Center Groningen concluded  
34 that neither this study (M18.2334032, 24 July 2018) nor our larger study (M16.192386, 10  
35 May 2016) fall within the scope of the Dutch Medical Research Involving Human Subjects  
36 Act.  
37

### 38 **ACKNOWLEDGEMENTS**

39 We thank all the participants in the original interview study and our co-researcher participants  
40 in this project. Because this is a meta-analysis of the PPI project, we decided not to invite the  
41 co-researchers as co-author of this article. We thank Laura Postma (PPIA2) for helping to  
42 facilitate the group meetings.  
43  
44

### 45 **FUNDING STATEMENT**

46 The PPI study itself was a low-cost project. Data collection for the main interview study was funded by  
47 the University of Groningen as part of the MD/PhD program of Malou Luchtenberg. This funding body  
48 has no role in the design of the study and collection, analysis, or interpretation of data, or in writing the  
49 manuscript.  
50  
51

### 52 **COMPETING INTERESTS STATEMENT**

53 None declared.  
54  
55

### 56 **DATA SHARING STATEMENT**

57 The original dataset with audiotaped and videotaped interviews is not available for the public  
58 on account of privacy concerns.  
59  
60

### AUTHOR'S CONTRIBUTION

ML, EM and EV designed the original study. ML was responsible for the data collection in Phase 1 and the group meetings were led by ML (PPIA1). Analysis was performed by ML, checked by EM, and discussed with EV. ML made the first draft of the article, which was subsequently discussed within the team and reviewed by EM and EV. All authors read and approved the final manuscript.

### REFERENCES

1. Hennink M, Hutter I, Bailey A. The nature of qualitative research. Subjectivity and the need for reflexivity. In: *Qualitative Research Methods*. London: Sage 2011:19-23.
2. Taylor RM, Whelan JS, Gibson F, et al. Involving young people in BRIGHTLIGHT from study inception to secondary data analysis: insights from 10 years of user involvement. *Res Involv Engagem* 2018;4(1):1–14. <https://doi.org/10.1186/s40900-018-0135-x>
3. Jamal F, Langford R, Daniels P, et al. Consulting with young people to inform systematic reviews: an example from a review on the effects of schools on health. *Heal Expect* 2015;18(6):3225–35. <https://doi.org/10.1111/hex.12312>
4. Coad J, Evans R. Reflections on practical approaches to involving children and young people in the data analysis process. *Child Soc* 2008 Jan;22(1):41–52. <https://doi.org/10.1111/j.1099-0860.2006.00062.x>
5. Clavering EK, McLaughlin J. Children's participation in health research: from objects to agents? *Child Care Health Dev* 2010;36(5):603–11. <https://doi.org/10.1111/j.1365-2214.2010.01094.x>
6. Brady L-M, Preston J. Evaluating the extent and impact of young people's involvement in National Institute for Health Research (NIHR) studies: an assessment of feasibility. 2017 April. [http://www.invo.org.uk/wp-content/uploads/2017/06/Impact-of-CYPs-involvement\\_JLI\\_GenR.pdf](http://www.invo.org.uk/wp-content/uploads/2017/06/Impact-of-CYPs-involvement_JLI_GenR.pdf) (accessed 01-07-2019)
7. Lundy L, McEvoy L, Byrne B. Working with young children as co-researchers: an approach informed by the United Nations Convention on the Rights of the Child. *Early Educ Dev* 2011;22(5):714–36. <https://doi.org/10.1080/10409289.2011.596463>
8. Holland S, Renold E, Ross NJ, et al. Power, agency and participatory agendas: a critical exploration of young people's engagement in participative qualitative research. *Childhood* 2010;17(3):360–75. <https://doi.org/10.1177/0907568210369310>
9. Locock L, Kirkpatrick S, Brading L, et al. Involving service users in the qualitative analysis of patient narratives to support healthcare quality improvement. *Res Involv Engagem* 2019;5(1):1–11. <https://doi.org/10.1186/s40900-018-0133-z>
10. INVOLVE. What is public involvement in research? *NHS Natl Inst Heal Res* 2015. <http://www.invo.org.uk/find-out-more/what-is-public-involvement-in-research-2/> (accessed 10-07-2019)
11. Bird D, Culley L, Lakhanpaul M. Why collaborate with children in health research: an analysis of the risks and benefits of collaboration with children. *Arch Dis Child - Educ Pract Ed* 2013;98(2):42–8. <https://doi.org/10.1136/archdischild-2012-303470>
12. Preston J, Stones SR, Davies H, et al. How to involve children and young people in what is, after all, their research. *Arch Dis Child* 2019;104(5):494–500. <https://doi.org/10.1136/archdischild-2018-315118>
13. Sonpal K, Walker E, Swallow V, et al. Report on involving children and young people in research. Southampton: INVOLVE. 2019. <https://www.invo.org.uk/wp-content/uploads/2019/06/77620-YPv3-Booklet-WEB.pdf> (accessed 01-07-2019)

14. Blackburn S, McLachlan S, Jowett S, et al. The extent, quality and impact of patient and public involvement in primary care research: a mixed methods study. *Res Involv Engagem* 2018;4(1):1–18. <https://doi.org/10.1186/s40900-018-0100-8>
15. Domecq JP, Prutsky G, Elraiyah T, et al. Patient engagement in research: a systematic review. *BMC Heal Serv Res* 2014;14(89):1–9. <https://doi.org/10.1186/1472-6963-14-89>
16. Kellett M, Forrest R, Dent N, et al. “Just teach us the skills please, we’ll do the rest”: Empowering ten-year-olds as active researchers. *Child Soc* 2004;18(5):329–43. <https://doi.org/10.1002/chi.807>
17. Chappell P, Rule P, Dlamini M, et al. Troubling power dynamics: youth with disabilities as co-researchers in sexuality research in South Africa. *Childhood* 2014;21(3):385–99. <https://doi.org/10.1177/0907568214525427>
18. Dovey-Pearse G, Walker S, Fairgrieve S, et al. The burden of proof: The process of involving young people in research. *Health Expectations* 2019;22:465–474. <https://doi.org/10.1111/hex.12870>
19. Best P, Badham J, Corepal R, et al. Network methods to support user involvement in qualitative data analyses: an introduction to Participatory Theme Elicitation. *Trials* 2017;18(1):1–14. <https://doi.org/10.1186/s13063-017-2289-5>
20. Brederoschool. Academische Basisschool 2019. Groningen, the Netherlands. <https://brederoschool.openbaaronderwijsgroningen.nl/academischebasisschool/index.html> (accessed 09-11-2018)
21. Dutch Medical Research Involving Human Subjects Act (WMO), 26 February 1998. <https://wetten.overheid.nl/BWBR0009408/2019-04-02> (accessed 09-04-2019)
22. Cambridge University Press. Meaning of mind map in English. Cambridge Dictionary. 2019. <https://dictionary.cambridge.org/dictionary/english/mind-map> (accessed 19-09-2019)
23. Smith J, Firth J. Qualitative data analysis: the framework approach. *Nurse Researcher* 2011;18(2):52–62. <https://doi.org/10.7748/nr2011.01.18.2.52.c8284>
24. Coad J. Using art-based techniques in engaging children and young people in health care consultations and/or research. *J Res Nurs* 2007;12(5):487–97. <https://doi.org/10.1177/1744987107081250>
25. Darbyshire P, Macdougall C, Schiller W. Multiple methods in qualitative research with children: more insight or just more? *Qual Res* 2005;5(4):417–436. <https://doi.org/10.1177/1468794105056921>
26. Hewitt J. Ethical components of researcher-researched relationships in qualitative interviewing. *Qual Health Res* 2007;17(8):1149–59. <https://doi.org/10.1177/1049732307308305>
27. Alldred P, Gillies V. Eliciting research accounts: re/producing modern subjects. *Ethics in Qualitative Research*. London: Sage 2002:146–65.
28. Gaillard S, Malik S, Preston J, et al. Involving children and young people in clinical research through the forum of a European Young Persons’ Advisory Group: needs and challenges. *Fundam Clin Pharmacol* 2018 Aug;32(4):357–62. <https://doi.org/10.1111/fcp.12360>
29. National Institute for Health Research. About INVOLVE. <https://www.invo.org.uk/about-involve/> (accessed 04-03-2020)
30. Garrison W, Felice ME. Adolescence. In: Carey WB, Crocker AC, Coleman WL, Elias ER, Feldman HM, eds. *Developmental-Behavioral Pediatrics (Fourth Edition)* 2009:62–73. <https://doi.org/10.1016/B978-1-4160-3370-7.00006-7>
31. Christie D, Viner R. Adolescent development. *BMJ (Clinical Research Ed.)* 2005;330:301. <https://doi.org/10.1136/bmj.330.7486.301>



1  
2  
3  
4  
5  
6  
7  
8  
9  
10  
11  
12  
13  
14  
15  
16  
17  
18  
19  
20  
21  
22  
23  
24  
25  
26  
27  
28  
29  
30  
31  
32  
33  
34  
35  
36  
37  
38  
39  
40  
41  
42  
43  
44  
45  
46  
47  
48  
49  
50  
51  
52  
53  
54  
55  
56  
57  
58  
59  
60

For peer review only

# BMJ Open

**'I actually felt like I was a researcher myself.'**  
**On Involving Children in the Analysis of Qualitative**  
**Paediatric Research in the Netherlands**

|                                 |                                                                                                                                                                                                                                                                                                                                              |
|---------------------------------|----------------------------------------------------------------------------------------------------------------------------------------------------------------------------------------------------------------------------------------------------------------------------------------------------------------------------------------------|
| Journal:                        | <i>BMJ Open</i>                                                                                                                                                                                                                                                                                                                              |
| Manuscript ID                   | bmjopen-2019-034433.R4                                                                                                                                                                                                                                                                                                                       |
| Article Type:                   | Original research                                                                                                                                                                                                                                                                                                                            |
| Date Submitted by the Author:   | 21-Jul-2020                                                                                                                                                                                                                                                                                                                                  |
| Complete List of Authors:       | Luchtenberg, Malou; University of Groningen; University Medical Center Groningen, Department of Pediatrics<br>Maeckelberghe, Els; University of Groningen, Institute for Medical Education; University Medical Center Groningen<br>Verhagen, Eduard; University of Groningen; University Medical Center Groningen , Department of Pediatrics |
| <b>Primary Subject Heading</b>: | Paediatrics                                                                                                                                                                                                                                                                                                                                  |
| Secondary Subject Heading:      | Ethics, Qualitative research, Research methods                                                                                                                                                                                                                                                                                               |
| Keywords:                       | Involvement, Children, PAEDIATRICS, Patient Participation, Biomedical Research, QUALITATIVE RESEARCH                                                                                                                                                                                                                                         |
|                                 |                                                                                                                                                                                                                                                                                                                                              |

SCHOLARONE™  
 Manuscripts



I, the Submitting Author has the right to grant and does grant on behalf of all authors of the Work (as defined in the below author licence), an exclusive licence and/or a non-exclusive licence for contributions from authors who are: i) UK Crown employees; ii) where BMJ has agreed a CC-BY licence shall apply, and/or iii) in accordance with the terms applicable for US Federal Government officers or employees acting as part of their official duties; on a worldwide, perpetual, irrevocable, royalty-free basis to BMJ Publishing Group Ltd ("BMJ") its licensees and where the relevant Journal is co-owned by BMJ to the co-owners of the Journal, to publish the Work in this journal and any other BMJ products and to exploit all rights, as set out in our [licence](#).

The Submitting Author accepts and understands that any supply made under these terms is made by BMJ to the Submitting Author unless you are acting as an employee on behalf of your employer or a postgraduate student of an affiliated institution which is paying any applicable article publishing charge ("APC") for Open Access articles. Where the Submitting Author wishes to make the Work available on an Open Access basis (and intends to pay the relevant APC), the terms of reuse of such Open Access shall be governed by a Creative Commons licence – details of these licences and which [Creative Commons](#) licence will apply to this Work are set out in our licence referred to above.

Other than as permitted in any relevant BMJ Author's Self Archiving Policies, I confirm this Work has not been accepted for publication elsewhere, is not being considered for publication elsewhere and does not duplicate material already published. I confirm all authors consent to publication of this Work and authorise the granting of this licence.

1  
2  
3 **‘I actually felt like I was a researcher myself.’**

4  
5 **On Involving Children in the Analysis of Qualitative Paediatric Research in**  
6  
7 **the Netherlands**

8  
9 Malou Luchtenberg, Els Maeckelberghe, Eduard Verhagen

10 University of Groningen, University Medical Center Groningen

11  
12  
13  
14  
15 Malou L. Luchtenberg

16 Beatrix Children’s Hospital

17 University of Groningen, University Medical Center Groningen, the Netherlands

18  
19  
20  
21 Els L.M. Maeckelberghe

22 Institute for Medical Education

23 University of Groningen, University Medical Center Groningen, the Netherlands

24  
25  
26  
27 A.A. Eduard Verhagen

28 Beatrix Children’s Hospital

29 University of Groningen, University Medical Center Groningen, the Netherlands

30  
31  
32  
33  
34 **Corresponding author:**

35 Malou L. Luchtenberg

36 PO Box 30 001, 9700 RB Groningen

37 The Netherlands

38 m.l.luchtenberg@umcg.nl

39 +31 6 25 64 96 59

40  
41  
42  
43  
44  
45  
46 Word count: 4304 (excl. title page, abstract, references, tables and quotes)

47  
48  
49  
50 **Keywords:** involvement, children, paediatrics, patient participation, biomedical research,  
51 qualitative research

## ABSTRACT

### Objectives

To evaluate the feasibility of a new approach to paediatric research whereby we involved children in analysing qualitative data, and to reflect on the involvement process.

### Setting

This was a single-centre, qualitative study in the Netherlands. It consisted of research meetings with individual children at home (Phase 1) or group meetings at school (Phase 2). In Phase 1 we identified themes from a video interview during five one-on-one meetings between a child co-researcher and the adult researcher. In Phase 2, during two group meetings, we explored the themes in detail using fragments from 16 interviews.

### Participants

We involved 14 school children (aged 10 to 14) as co-researchers to analyse children's interviews about their experience while participating in medical research. Notes were taken, and children provided feedback. A thematic analysis was performed using a framework approach.

### Results

All co-researchers identified themes. The time needed to complete the task varied, as did the extent to which the meetings needed to be structured to improve concentration. The children rated time investment as adequate and they considered acting as co-researcher interesting and fun, adding that they had learnt new skills and gained new knowledge. The experience also led them to reflect on health matters in their own lives. The adult researchers considered the process relatively time intensive, but the project did result in a more critical assessment of their own work.

### Conclusion

The new, two-phase approach of involving children to help analyse qualitative data is a feasible research method. The novelty lies in involving children to help identify themes from original interview data, thereby limiting preselection of data by adults, before exploring these themes in detail. Videos make it easier for children to understand the data and to empathise with the interviewees, and limits time investment.

## STRENGTHS AND LIMITATIONS OF THIS STUDY

- This study describes a new approach to paediatric research whereby children are involved in analysing qualitative interview data.
- The novelty of this study lies in the fact that children are involved in helping to identify themes from original data as well as exploring the themes in more detail.
- This study explores the use of videos rather than transcripts to present the interviews to relatively young co-researchers.
- The study reflects on children's involvement as co-researchers from the perspective of the children themselves and from that of the adult researchers.
- A limitation of this study is that in test phase presented here we limited the number of child co-researchers and selected the interviews from a larger dataset to include as much variation as possible.

## INTRODUCTION

1  
2  
3  
4  
5  
6 Researchers should be wary of interpretation bias when analysing data of qualitative studies.  
7 Qualitative research includes a subjective component that calls for reflexivity.[1] Because the  
8 life experiences and social situations of children differ from those of adults, their  
9 interpretations of data derived from interviews with children may differ from adults'  
10 interpretations. It is therefore desirable to involve children to strengthen the analysis of such  
11 qualitative data. There is little evidence in the literature on how children could be effectively  
12 involved in scientific data analysis.[2–9] Other challenges regarding patient and public  
13 involvement (PPI) [10] of children include lack of funding and lack of time, gatekeeping or  
14 power imbalances, and concerns about obtaining knowledge and training on how to involve  
15 children.[2,5,11–17] Measuring the impact of a PPI process on research output is difficult  
16 because the involvement process itself is complex and therefore its impact cannot be fully  
17 captured by evaluating outcomes.[18]  
18  
19  
20  
21  
22  
23  
24  
25  
26  
27

28 Best and colleagues recently introduced a new method called participatory theme elicitation,  
29 whereby a youth advisory panel is involved in qualitative data analysis. The method involves  
30 capacity building (training), data selection by adult researchers, data sorting by youth  
31 members, and final grouping and analysis by adult researchers.[19] A disadvantage of the  
32 method is that it involves data preselection by adults. We hypothesise that it is feasible to  
33 involve children from the beginning of data analysis, starting with the identification of themes  
34 from original data.  
35  
36  
37  
38  
39  
40  
41

42 In a larger unpublished study, we collected the experiences of young people regarding their  
43 participation in medical research in order to provide recommendations for improving  
44 children's participation in research. In the present study, we aimed to explore whether it is  
45 feasible to involve children in the analysis of the qualitative data. We designed a two-phase  
46 approach that would be effective and efficient: effective in the sense that it involved children  
47 to identify themes as well as to explore the themes in more detail and efficient in the sense of  
48 limiting time investment. We also aimed to reflect on the involvement process from the  
49 perspective of both adults and children. The results of the qualitative data analysis are to be  
50 published elsewhere.  
51  
52  
53  
54  
55  
56  
57  
58  
59  
60

## **METHODS**

This was a single-centre study performed by researchers of University Medical Center Groningen, the Netherlands. We investigated the involvement of children as co-researchers in identifying and analysing themes from interview data presented on video. We conducted the investigation in two phases: Phase 1 consisted of five individual meetings, and Phase 2 of two group meetings. In addition, we reflected on the children's involvement in the analysis process.

### **Recruitment and sampling**

#### **Phase 1**

We approached potential co-researchers through national patient support organizations, primary schools, hospitals, social media, and by word-of-mouth. No research experience was required of the participants. Sampling was based on age (9-18 years) and participants were required to be fluent in Dutch because the meetings were held in that language. Initially, seven children volunteered. They each received an information leaflet. Even though recruitment was challenging we managed to achieve our goal of five participants in Phase 1.

#### **Phase 2**

We recruited the participants for Phase 2 in collaboration with a specific primary school in Groningen, the Netherlands, where teachers and learners are expected to display an academic mind-set aimed at research and analysis.[20] We invited one class of 15 children of the school's oldest learners to participate. Ten learners volunteered, one of whom was unable to participate because of illness.

### **Informed consent**

#### **Phase 1**

We supplied the potential participants with verbal and written information. We asked them to discuss the study with their parents and to reply by post, e-mail or by telephone. Before the session at the child's home started, he or she read the informed consent form and discussed it with the researcher and a parent. One parent was present throughout the session, but was kindly asked to not interfere with the process. All the children, irrespective of age, were asked to sign the informed consent form to acknowledge that we appreciated their contribution equally. In accordance with the Dutch Medical Research Involving Human Subjects Act, parental consent was obtained in addition to the child's consent.[21] Children were also asked to sign a confidentiality agreement regarding any personal information present in the data

they analysed. At the end of the session we gave the participants a €10 gift voucher as token of our appreciation of their time and a certificate acknowledging their contribution as co-researchers.

## Phase 2

Two adult researchers visited the primary school to meet the learners, their teacher and headmaster, and to introduce the research project. The headmaster agreed to allow the children to participate during school hours. The potential participants received an information leaflet similar to the one given to the participants of Phase 1. We asked them to complete the consent form and the confidentiality agreement at home with a parent, and to return the form to their teacher. At the end of the group meetings we gave the participants a certificate. These children were not given a gift voucher because they participated during school hours.

### Data characteristics

Data from the original interview study were analysed by our co-researchers. In addition, the adult researchers took notes during the analyses and written feedback was obtained from the participants before, during, and after participating. In Table 1 we provide additional information on the data collected for the original interview study. Out of a total of 23 interviews two were excluded because they were not videotaped. Another five were excluded because participants and parents had not consented to use the video data.

*Table 1. Details of data of the original interview study on children's experiences in medical research*

| Study characteristics            |                                                                                                                                                                                                                                                                                                                                                                                                                                                                                   |
|----------------------------------|-----------------------------------------------------------------------------------------------------------------------------------------------------------------------------------------------------------------------------------------------------------------------------------------------------------------------------------------------------------------------------------------------------------------------------------------------------------------------------------|
| <b>Aim</b>                       | To explore children's experiences in medical research to obtain recommendations from their perspectives on how to improve children's involvement in research.                                                                                                                                                                                                                                                                                                                     |
| <b>Setting and research team</b> | Single-centre study conducted by a team of researchers at University Medical Center Groningen, the Netherlands. The research team consisted of an ethicist (EM), paediatrician (EV), and MD/PhD student (ML). All members were trained researchers and/or had previous experience in conducting qualitative research.                                                                                                                                                             |
| <b>Recruitment and sampling</b>  | Recruitment through health providers from several hospitals, national patient support groups, social media, and by word-of-mouth. Purposive maximum variation sample: children, patients as well as healthy volunteers between 9 and 18 years old who were invited to participate in different types of medical research in the Netherlands and who either took part or declined to take part. The participants had no prior relationships with the members of the research team. |
| <b>Informed consent</b>          | Informed consent given by one parent and the child or, in accordance to Dutch law, from 16 years and older by the child only.                                                                                                                                                                                                                                                                                                                                                     |



|                         |                                                                                                                                                                                                                                                                                                                                                                                                                                                                                                                                                                                                                                                          |
|-------------------------|----------------------------------------------------------------------------------------------------------------------------------------------------------------------------------------------------------------------------------------------------------------------------------------------------------------------------------------------------------------------------------------------------------------------------------------------------------------------------------------------------------------------------------------------------------------------------------------------------------------------------------------------------------|
| <b>Data collection</b>  | Twenty three semi-structured, in-depth interviews, lasting between 30 and 100 minutes, with children about their experiences in taking part in medical research, including recommendations for improvement of children's involvement in informed consent procedures and the research itself. A topic guide was developed based on a previous study in the United Kingdom. Interviews performed by ML took place at children's homes and were recorded on audio or video, transcribed verbatim, and returned to the participants. No comments from participants were received. Data collection continued until we reached data saturation of main themes. |
| <b>Ethical approval</b> | The conclusion of the Medical Ethics Review Board of the University Medical Center Groningen was that this study, no. M16.192386, 10 May 2016 fell beyond the scope of the Dutch Medical Research Involving Human Subjects Act .                                                                                                                                                                                                                                                                                                                                                                                                                         |

The co-researchers received a brief interactive introduction to paediatric research and to the original interview study. They were asked to identify the main topics in video interviews and to summarise them on mind maps (*A type of diagram with lines and circles for organising information so that it is easier to use or remember*).<sup>[22, p1]</sup> To prevent the children from becoming 'little adult researchers' we did not train them extensively. Extensive training would also have been more time consuming for both the children and the researchers.

In Phase 1 the five co-researchers collaborated with the coordinating researcher (PPIA1 – PPI adult researcher 1) in a one-on-one session to identify the main themes in five different interviews. Together they watched a video of between 25 to 45 minutes of another young person and discussed the emerging themes. This took place at the participants' home and lasted between two and three and a half hours. During Phase 1 the adult researcher spent a total of eleven hours travelling to and from co-researchers homes.

During the two group meetings in Phase 2, we explored in detail two themes that had been identified during Phase 1. For this purpose we compiled two five-minute videos from fragments of several interviews from the dataset of the original study. The group meetings took place at a local primary school and lasted approximately two and a half hours. Travelling time for adult researchers was two hours, including the introductory meeting when we handed out the information sheets. In addition to travelling time, the time investment of adult researchers was approximately five hours. This included the time spent preparing the instructions and making the compilation videos. The material costs of the project were low and the travelling costs minimal.

1  
2  
3 The aim of the analysis process in both phases was to identify the main themes in the video  
4 through open, unstructured discussions with the child co-researchers. To facilitate interaction  
5 and discussion the co-researchers and the adult researchers could pause the video at any time.  
6  
7 They took notes of what they thought the interviewee found important. PPIA1 and PPIA2  
8  
9 allowed moments of personal reflection, but were on guard for potential intertwining of co-  
10  
11 researchers' personal experiences with interviewees' experiences. After watching the video  
12  
13 the co-researchers drew a mind map depicting their interpretation of the connection between  
14  
15 different themes.[22] The mind maps were drawn on A3-sized sheets of paper, using  
16  
17 different sizes of sticky notes, and coloured pens. Besides, the participants were free to use  
18  
19 materials of their own choice. The researcher asked the participants questions about the  
20  
21 importance of certain themes, the identification of overlapping themes, and the reason why  
22  
23 they had chosen a certain theme. The participants led the discussion and made the final  
24  
25 decision in case of a disagreement about a theme.  
26

### 27 **Data collection and analysis**

28 Before the study actually commenced, we asked the child co-researchers why they would like  
29  
30 to take part. The adult researchers took notes of how participants fulfilled their role as co-  
31  
32 researcher, and how the participants reflected on this process. Child co-researchers completed  
33  
34 a feedback form after the analysis (Table 2). In addition, we briefly evaluated the process  
35  
36 orally. All meetings were recorded on audio tape.  
37

38  
39 We performed a thematic analysis using a framework approach.[23] Familiarisation and  
40  
41 initial theme identification was done by PPIA1 (ML) and discussed with EM (individual  
42  
43 meetings) and PPIA2 (group meetings) based on the audio tape, notes, and the participants'  
44  
45 written feedback. Some themes, such as time investment, were identified in advance from the  
46  
47 literature, others were derived from the data. Themes were refined and conceptualised during  
48  
49 regular meetings with the research team and any disagreements were discussed and a final  
50  
51 decision reached by consensus. Because the sample for this exploratory study was relatively  
52  
53 small, we did not aim for data saturation.  
54

55 *Table 2. Feedback form*

|                                                                                                    |                                                                                      |
|----------------------------------------------------------------------------------------------------|--------------------------------------------------------------------------------------|
| 56 1. Did you understand beforehand what your role<br>57 was in the project? (No / a little / yes) | 56 6. Would you recommend other children to become<br>57 co-researchers? Why?        |
| 58 2. How could we improve the information about<br>59 working as a co-researcher?                 | 58 7. How would you rate your time investment? (Too<br>59 long, adequate, too short) |

|                                                                                                            |                                                                                                                                                                 |
|------------------------------------------------------------------------------------------------------------|-----------------------------------------------------------------------------------------------------------------------------------------------------------------|
| 3. What was it like for you to work as a co-researcher?<br>a. positive aspects<br>b. points of improvement | 8. a. What did you think of the EUR 10 gift voucher? (Phase 1)<br>b. What did you think about participating in this project during school hours? Why? (Phase 2) |
| 4. Did you learn anything from being a co-researcher? If so, what did you learn?                           | 9. Do you have suggestions for improving this evaluation form?                                                                                                  |
| 5. Would you like to be a co-researcher more often?                                                        |                                                                                                                                                                 |

## Patient and public involvement

We explored the feasibility of an approach whereby children were involved in qualitative data analysis, both in helping adult researchers to identify themes from original data as in exploring the themes in more detail.

## RESULTS

### Participant characteristics

Fourteen children, eight girls and six boys, participated as co-researchers in this study. Two participants had experience because they had been chronic patients themselves. None of the children had been a co-researcher before. Tables 3 and 4 show the characteristics of the child and adult participants.

Table 3. Child participant characteristics

| Characteristics of child co-researchers               | N* (%)** |
|-------------------------------------------------------|----------|
| <i>Sex</i>                                            |          |
| Girl                                                  | 8 (57)   |
| Boy                                                   | 6 (43)   |
| <i>Age</i>                                            |          |
| 10 years                                              | 1 (7)    |
| 11 years                                              | 10 (71)  |
| 12 years                                              | 2 (14)   |
| 13 years                                              | 0 (0)    |
| 14 years                                              | 1 (7)    |
| <i>School attended</i>                                |          |
| Primary School                                        | 13 (93)  |
| Secondary School                                      | 1 (7)    |
| <i>Hospital/Disease experience (lived experience)</i> |          |
| Currently suffering from a disease                    | 2 (14)   |
| Hospitalization or minor surgery in the past          | 6 (43)   |
| Family member(s) who suffer from a disease            | 2 (14)   |
| None                                                  | 4 (29)   |
| <i>Research experience as participant</i>             |          |
| Yes                                                   | 2 (14)   |
| No                                                    | 12 (86)  |
| <i>Experience as co-researcher</i>                    |          |
| Yes                                                   | 0 (0)    |
| No                                                    | 14 (100) |

\* Number of child participants; N = 14

\*\* Rounded to nearest whole number

Table 4. Adult participants characteristics

| Participant | Sex   | Experience illness /hospital                                      | Research experience (participating in research)                 | Research experience (performing research)                       |
|-------------|-------|-------------------------------------------------------------------|-----------------------------------------------------------------|-----------------------------------------------------------------|
| PPIA1       | Woman | As a medical student. Graduated as medical doctor in August 2019. | Yes. Participant in two large cohort studies for several years. | Training and experience in qualitative research for PhD.        |
| PPIA2       | Woman | As a medical student. Started internships in September 2019.      | No previous experience in medical research participation.       | Trained in qualitative research as a former psychology student. |

### Reflection and evaluation of the involvement process

The results can be divided into five main themes: (1) understanding the study procedures, (2) empowerment, (3) reflection on health and illness, (4) interest in the bigger picture, and (5) reflection on time investment. The results of the feedback form are summarised in Table 5.

Table 5. Summary of written feedback

| Theme (question from Table 2)                                        | Summary of written feedback                                                     | N* (%)** |
|----------------------------------------------------------------------|---------------------------------------------------------------------------------|----------|
| <b>Understanding the study procedures</b><br>(1,2,9)                 | <i>Understanding their role as co-researcher before start***</i>                |          |
|                                                                      | No                                                                              | 0 (0)    |
|                                                                      | A little                                                                        | 12 (86)  |
|                                                                      | Yes                                                                             | 2 (14)   |
| <b>Empowerment</b><br>(3-6)                                          | <i>Suggestions for improving the information about working as co-researcher</i> |          |
|                                                                      | Don't know                                                                      | 4 (29)   |
|                                                                      | Everything was clear                                                            | 5 (36)   |
|                                                                      | Use fewer difficult words                                                       | 4 (29)   |
|                                                                      | Explain that we had to take notes and create a mind map                         | 1 (7)    |
|                                                                      | <i>Suggestions for improving the feedback form of the co-researcher project</i> |          |
|                                                                      | Adding a question about the overall experience                                  | 1 (7)    |
|                                                                      | No recommendations                                                              | 13 (93)  |
|                                                                      | <i>Positive experience as co-researcher</i>                                     |          |
|                                                                      | Fun                                                                             | 14 (100) |
| Interesting                                                          | 4 (29)                                                                          |          |
| Helping other children                                               | 1 (7)                                                                           |          |
| Learning something new                                               | 1 (7)                                                                           |          |
| Time investment was okay                                             | 2 (14)                                                                          |          |
| Receiving a certificate                                              | 1 (7)                                                                           |          |
| <i>Points of improvement for co-researcher project</i>               |                                                                                 |          |
| No points of improvement                                             | 12 (86)                                                                         |          |
| Shorter interviews                                                   | 1 (7)                                                                           |          |
| The project should take the whole school day (instead of a half one) | 1 (7)                                                                           |          |
| <i>Lessons learnt from being a co-researcher</i>                     |                                                                                 |          |
| Taking notes                                                         | 2 (14)                                                                          |          |
| Critical thinking and listening                                      | 4 (29)                                                                          |          |
| About a medical condition                                            | 2 (14)                                                                          |          |
| About doing research                                                 | 2 (14)                                                                          |          |

|                                  |                                                                              |         |
|----------------------------------|------------------------------------------------------------------------------|---------|
|                                  | About how children think and feel about research                             | 2 (14)  |
|                                  | That children think differently from adults                                  | 1 (7)   |
|                                  | That it is fun and that you learn a lot                                      | 1 (7)   |
|                                  | Not really                                                                   | 1 (7)   |
|                                  | <i>Would like to be co-researcher more often including reason</i>            |         |
|                                  | Yes, because it's fun                                                        | 12 (86) |
|                                  | Yes, because it's interesting                                                | 5 (36)  |
|                                  | Yes, because I like to help people                                           | 1 (7)   |
|                                  | Yes, I know what to expect now                                               | 1 (7)   |
|                                  | Yes, if it doesn't hurt                                                      | 1 (7)   |
|                                  | It is fun, but depends on how much time I have                               | 1 (7)   |
|                                  | <i>Would you recommend others to become co-researcher?</i>                   |         |
|                                  | Yes, because it's (super) fun                                                | 9 (64)  |
|                                  | Yes, because it's interesting/you learn something from it                    | 7 (50)  |
|                                  | Yes, because you receive a gift voucher                                      | 1 (7)   |
|                                  | Yes, because you can help other people                                       | 2 (14)  |
|                                  | Yes, because you get sweets                                                  | 1 (7)   |
|                                  | Yes, but it depends on whether it suits them                                 | 1 (7)   |
| <b>Time investment</b><br>(7,8b) | <i>Rating of time investment***</i>                                          |         |
|                                  | Too long                                                                     | 1 (7)   |
|                                  | Adequate                                                                     | 12 (86) |
|                                  | Too short                                                                    | 1 (7)   |
|                                  | <i>Thoughts on having this project during school time (Phase 2, n=9)****</i> |         |
|                                  | Fun/good, because you didn't have to do schoolwork                           | 6 (67)  |
|                                  | Fun/good, because you don't miss free time after school                      | 4 (44)  |
|                                  | Don't mind                                                                   | 1 (11)  |
| <b>Compensation</b><br>(8b)      | <i>Thoughts on receiving a gift voucher (Phase 1, n=5)****</i>               |         |
|                                  | Fun/good                                                                     | 5 (100) |
|                                  | Not necessary                                                                | 2 (40)  |
|                                  | Creative                                                                     | 1 (20)  |

\* Number of child participants; N = 14. Some participants provided more than one answer

\*\* Rounded to nearest whole number

\*\*\* The feedback provided is based on a multiple choice question

\*\*\*\* Calculation based on a sub-selection of total participants, because children took part in a different phase

## 1. Understanding of study procedures

When we asked the participants in the group meetings what they expected of the session, they remembered that the main idea was 'doing research about research.' Nonetheless, not everyone remembered the details such as whether photographs would be taken. Even though the information was especially written with children in mind, the participants recalled that it was mostly read and signed by their parents, and had not always been discussed with them. In the case of the co-researchers in the individual meetings this was different. Here the researcher and the parents were present and encouraged the children to complete the form themselves. Parents were available in the background in case their help was needed. Most children reported that they had a general idea about what their role was in the project. We explained their role to them in detail during the actual project. One of them explained:

1  
2  
3 *'I already understood it but once you are doing it you understand it [better].'* (Girl,  
4 individual meeting)  
5  
6  
7

## 8 **2. Empowerment**

9

10 By involving children as co-researchers they gained knowledge, they learnt new skills, and  
11 they became more confident in fulfilling their role during the analysis process. This was  
12 mostly because they enjoyed the new experience of contributing to research or helping others.  
13 Children felt empowered by working as a co-researcher. One of them explained it as:  
14  
15  
16

17  
18  
19 *'It actually felt a bit like I was a researcher myself.'* (Girl, group meeting)  
20  
21

22 They reported gaining new knowledge about certain health matters and they realised what it is  
23 like to be ill. They learnt how to do research, how to think critically, and how to take notes.  
24 Here are some representative answers given:  
25  
26  
27

28  
29 *'You have to think carefully before you draw conclusions.'* (Boy, group meeting)  
30  
31

32 *'A bit about how ill children felt afterwards [after participating in research].'* (Girl,  
33 group meeting)  
34  
35  
36

37 All the participants were positive about the idea of being a co-researcher more often, mostly  
38 for similar reasons as for wanting to take part in the first place:  
39  
40  
41

42  
43 *'Yes, it was fun, relaxed, and instructive.'* (Girl, group meeting)  
44  
45

46 One participant, the only one attending secondary school, mentioned it would depend on  
47 whether he had the time to take part because of homework and sports activities in his free  
48 time. All participants reported that they would recommend others to become co-researchers,  
49 though one participant acknowledged that it might not suit everyone. She mentioned that  
50 some children might not enjoy it or might not have the skills to do such work.  
51  
52  
53  
54  
55

56 During the analysis process in Phase 1, the co-researchers grew noticeably more confident as  
57 time progressed. The adult researcher retreated to the background and stimulated the co-  
58 researchers to take the lead, which most of them did eventually. One participants actually  
59  
60

1  
2  
3 asked the researcher questions about her observations, instead of the other way around. Most  
4 participants, however, needed some form of structuring support from the adult researcher  
5 throughout.  
6  
7  
8  
9

10 During the group meetings the support needed from the adult researcher was different. The  
11 co-researchers needed more structuring because of group dynamics. Confusion due to  
12 competing voices ensued, and shyer children tended to not be heard. Interestingly, the two  
13 groups chose different ways of translating their notes to the mind map. In one group the adult  
14 researcher noticed a clear distinction in participants' role preferences, and the co-researchers  
15 divided the roles between themselves. Some preferred an executive role, such as writing down  
16 themes on the 'sticky notes', while others preferred to simply express their ideas and to play a  
17 more coordinating role. Some found it difficult to summarise their notes and suggested first  
18 underlining important notes:  
19  
20  
21  
22  
23  
24

25  
26  
27 *'We could also just first underline what we think is important.'* (Girl, group meeting)  
28  
29

30  
31 The co-researchers in the other group together decided that they all wanted to write down  
32 their own notes on 'sticky notes' and to put them all on the mind map. The outcome was a  
33 mind map that displayed different topics as well as providing insight into how important the  
34 individuals thought a certain topic was by the number of 'sticky notes' on the same topic.  
35 Others only needed a bit more time and space to find their own role.  
36  
37  
38  
39

40  
41 It was challenging for the adult researchers to not provide answers themselves when the  
42 participants indicated that they did not know how to proceed with the analysis. By repeating  
43 or rephrasing their question and by acknowledging that they were doing the right thing, the  
44 adult researcher could reinforce the children. Both adult researchers were surprised by the co-  
45 researcher's achievements. Throughout the project the co-researchers displayed the ability to  
46 identify themes and to visualise them in mind maps, underlining the feasibility of this  
47 approach and its value for interpreting data.  
48  
49  
50  
51  
52  
53

54  
55 The researchers learnt a great deal from involving children in the analyses because the  
56 participants were very open and direct in their feedback. If they did not understand something,  
57 for example, if a question was not clearly formulated, or if they did not understand medical  
58 jargon such as 'treatment protocol', they said so immediately.  
59  
60

1  
2  
3  
4  
5 Whereas the adult researchers tended to generalise findings, the co-researchers stuck more to  
6 the original data. One topic, for example, dealt with recommendations to researchers for  
7 improving young people's experiences when participation in medical research. The  
8 interviewees mentioned issues like making hospital visits more enjoyable and gave concrete  
9 suggestions. All the researchers, adults and children alike, started from the original data, but  
10 there appeared to be a difference in analysis. The concrete suggestions in the children's  
11 analyses remained and their recommendations were therefore emphasised, while the adults  
12 generalised them into 'ways to brighten up the visits'. The co-researchers brought the adults  
13 back to the basics that were important to children.  
14  
15  
16  
17  
18  
19  
20  
21

### 22 **3. Reflection on health and illness**

23 The participants empathised with the young people who shared their experiences in the video.  
24 They wondered whether they were still ill or asked if they still lived and hoped they were all  
25 right. The following is a representative example:  
26  
27  
28  
29

30 *'None of these children [in the video] is deadly ill, right?'* (Girl, group meeting)  
31  
32

33 The adult researcher explained the different illnesses the interviewees had, and mentioned that  
34 some of them had been critically ill, for example, with leukaemia, but that they were stable at  
35 the time they were interviewed.  
36  
37  
38  
39

40 The co-researchers asked questions about the illnesses and what the consequences might be  
41 for the lives of the children such as two siblings with a hereditary condition. They also shared  
42 their own experiences, for example, about relatives who had cancer.  
43  
44  
45  
46

### 47 **4. Interest in the bigger picture**

48 Even though we only involved the participants in the analysis stage of the main interview  
49 study, they were well aware that this was part of a bigger study. They asked about the other  
50 participants and previous experiences with involving children in research analysis, and  
51 wondered whether we would show the mind maps they had made to the interviewees.  
52 Some of the questions they asked were:  
53  
54  
55  
56  
57  
58  
59  
60



1  
2  
3 *'Have you been to children's homes?' 'Are you also doing this [project] at other*  
4 *schools?'* *'How many times have you done this?'* (Several co-researchers, boys and  
5 girls, group meetings, not clearly identifiable from the audio)  
6  
7  
8  
9

10 Hearing that they were the first group of children that participated as co-researchers in this  
11 project made them feel special. They expressed the wish to receive the final results and hoped  
12 we would do this project again. The co-researchers had a broader interest than just fulfilling  
13 their role as co-researchers. They also asked personal questions, such as why the adult  
14 researchers did this research project and whether it was part of their university training. They  
15 also acknowledged and enjoyed helping the adult researchers with their research:  
16  
17  
18  
19

20  
21  
22 *'It is, of course, good for you [adult researchers] that we participate so that you can*  
23 *continue doing research about research of the research.'* (Girl, group meeting)  
24  
25  
26

## 27 **5. Reflection on time investment**

28 Most children said the time investment was appropriate. One child in the group meetings  
29 reported that a shorter meeting would have been better because some children became  
30 distracted:  
31  
32  
33

34  
35 *'Because at the end we were chatting a bit, [we got] distracted.'* (Boy, group meeting)  
36  
37  
38

39 This was also observed by the adult researchers. Another participant, however, reported that  
40 he would have liked the session to last longer because he really liked it and did not want to  
41 return to his normal schoolwork. The Phase 2 participants all reported that it was an  
42 interesting and fun alternative to normal school tasks. They thought it was good to do the  
43 project during school time because this way they would not miss out on any free time. One of  
44 the participants explained this:  
45  
46  
47  
48  
49

50  
51 *'It was fun because you didn't have to work, and if it hadn't been during school it was*  
52 *inconvenient.'* (Girl, group meeting)  
53  
54  
55

56 From the adult perspective, time was invested in recruitment, developing material to introduce  
57 and explain the procedure, and thinking about how to best involve children. The actual  
58 analysis with co-researchers was time-intensive and lasted longer than we had expected.  
59  
60

1  
2  
3 Nevertheless, the time invested was considered reasonable given the empowerment of  
4 children, their learning new skills, and their views on our data provided additional insight,  
5 which is promising for the interpretation of our interviews.  
6  
7  
8  
9

## 10 **DISCUSSION**

11 Little evidence is available on how to involve children in research.[11] In this paper we  
12 describe how we involved relatively young children in the analysis of medical research  
13 interviews analysis using a two-phase approach. We deployed various strategies to avoid a  
14 tokenistic approach, to address challenges regarding time management, and to empower  
15 children during the process.  
16  
17  
18  
19

### 20 **Two-phase approach**

21 Involving relatively young children, aged 10 to 14, in our interview analyses was a  
22 challenging process. Our aim was to limit preselection of data by adults by introducing one-  
23 on-one meetings during which research interviews were analysed by young co-researchers.  
24 This approach could be considered an extension of Best's 'participatory theme elicitation'  
25 method.[19] Even though the sessions lasted longer than originally intended, the fact that we  
26 could focus on one individual worked to our advantage. In our opinion the project benefitted  
27 from the fact that the individual meetings were held at the children's homes, which  
28 constituted a safe and familiar environment. This confirms findings from Dovey-Pearce and  
29 colleagues who highlighted the importance of face-to-face meetings to establish  
30 relationships.[18] The themes identified during Phase 1 were explored in detail during group  
31 meetings in Phase 2. Working with a number of co-researchers in this phase improved the  
32 rigor of the qualitative analysis. In addition, there was an unexpected positive result for the  
33 co-researchers who were classmates. Their bond was strengthened by their shared research  
34 experience and by reflecting on health and illness together. The two-phase approach enabled  
35 us to achieve our research goals and to empower our co-researchers, while keeping within  
36 reasonable the time limits. This applied to adult and child researchers alike.  
37  
38  
39  
40  
41  
42  
43  
44  
45  
46  
47  
48  
49  
50  
51

### 52 **Use of videos in analysis**

53 Our aim was to involve child co-researchers in interview analyses in an effective and efficient  
54 way. Data analysis in qualitative research is often lengthy process involving large quantities  
55 of text. Locock and colleagues reported that young people reading through the transcripts  
56 was tedious and inefficient. They concluded that it was more effective to discuss the data  
57 rather than digging into detailed transcripts.[9] We decided to explore other ways of involving  
58  
59  
60

1  
2  
3 young co-researchers in interview analyses. Visuals such as photographs, drawings, or  
4 mapping methods are often used in collaborations with young children to collect data about  
5 children's views on, for example, what they value in their lives.[24] Darbyshire and  
6 colleagues reported that using a variety of qualitative visual techniques is helpful for engaging  
7 children in research. It also provides a good way for children to express their views. There is,  
8 however, a problem with using visuals as a participatory method rather than in analysis, as  
9 Darbyshire and colleagues pointed out: '*...having children take photographs and then having  
10 only adults "interpret" (or possibly misinterpret) them is potentially an adultist approach to  
11 research on children that we sought to avoid.*'[25] For this reason we used videos in the  
12 analysis stage to visualise the interview data to be analysed. Our study confirmed the benefits  
13 expressed by Darbyshire and colleagues. The co-researchers enjoyed the creative process of  
14 developing the mind map and the videos helped them understand and empathise with the  
15 interviewees. Using videos rather than transcripts made the process more time-efficient, while  
16 preserving the effectiveness of a thematic analysis. Another benefit of videos over transcripts  
17 concerned the rigor of the qualitative data analyses. The analysis of interview data is often  
18 assumed to start as soon as the interview has been fully transcribed but, even in case of a  
19 verbatim transcript including descriptions of vocal emotions such as laughter, the loss of key  
20 elements, such as volume of voices and facial expressions, remains. This could present  
21 interviewees' experiences in a more abstract way than the original data show.[26, 27] Put  
22 differently, by using videos we possibly started the analysis with a more authentic  
23 representation of the data.

### 41 **Additional considerations and further research**

42 Time investment is an important consideration when developing ways of involving children in  
43 research analysis. In the method developed by Best and colleagues the analysis is limited to  
44 two hours. An additional time investment of four times 90 to 120 minutes is asked of  
45 participants for 'capacity building.' In these sessions, young people learn how to design and  
46 conduct a study, how to perform qualitative data analyses, and they receive an introduction  
47 into the subject matter of their data.[19] We purposely did not train our co-researchers to  
48 avoid shaping them to comply with our idea of a qualitative researcher, and to limit time  
49 investment. Though we cannot make a comparison, the little training we gave our co-  
50 researchers did not seem to have had a negative impact on the result.

1  
2  
3 In addition to time investment, timing of research meetings should be considered. Many  
4 Young People's Advisory Groups generally plan their meetings during school holidays or  
5 weekends.[28] The INVOLVE Advisory Group of the United Kingdom's National Institute  
6 for Health Research, which supports active public involvement in the National Health  
7 Service, public health, and social care research,[29] identified parents and schools as a  
8 significant barrier to public involvement during school hours: *...lack of schools' recognition*  
9 *of the value of their work sometimes acts as a barrier to them attending events which involve*  
10 *travel in school hours.*[13, p12] Nevertheless, thanks to a cooperative headmaster, we  
11 managed to set up a collaboration with a primary school for Phase 2 of our study, and planned  
12 the group meetings during school hours. For our co-researchers in the group meetings,  
13 participating during school time was preferable to after school, because they reported that  
14 they had busy schedules or had to do homework during their free time.  
15  
16  
17  
18  
19  
20  
21  
22  
23  
24

25 Our results showed that children tend to include more concrete topics in their analyses,  
26 whereas adults analyse data in a more abstract way. This is in line with the cognitive  
27 development of children, who transform from concrete to abstract conceptualisation later in  
28 adolescence.[30, 31] Consequently, we expect that an evaluation of the data analysis process  
29 performed by children, young people, and adults will provide additional interesting insights.  
30 Recently, we started testing our two-phase approach with young people aged 16 to 18. They  
31 will use this project for a school assignment, thereby creating a situation that is mutually  
32 beneficial. If this proves successful, we consider setting up a long-term collaboration with  
33 primary schools and secondary schools to optimise collaboration between researchers and  
34 children to help decrease the knowledge gap between academia and society.  
35  
36  
37  
38  
39  
40  
41  
42  
43  
44

### 45 **Study limitations**

46 To test this new approach we started with a small group of young co-researchers. As a  
47 consequence, we had to select of interviews from a larger dataset to analyse in Phase 1. We  
48 aimed for as much variation as possible within this selection, but we also needed to be  
49 pragmatic, regarding the length of the interviews for instance. In addition, in our method  
50 children were not involved in making choices about specific quotes used in the results  
51 sections. As recruiting co-researchers was challenging, sampling was limited to age and to  
52 fluency in the Dutch language. Maximum variation sampling would, however, be preferable  
53 to improve reflexivity.  
54  
55  
56  
57  
58  
59  
60

## CONCLUSION

We suggest that the two-phase approach to involving young children in analysing qualitative data is feasible. Its novelty lies in recruiting children to help identify themes from original data before the themes are explored in detail. Thus preselection of data by adults is limited. By combining one-on-one meetings and group meetings the two-phase approach is an effective and efficient way of involving relatively young children in analysing qualitative data. Additional benefits are that children reflect on health and illness in their own lives, they are empowered, and engaged in medical research. We recommend presenting the interview data on videos rather than through transcripts. Videos make it easier for children to understand the data, to empathise with the interviewees, and it limits time investment.

## ETHICS APPROVAL

The Medical Ethics Review Board of the University Medical Center Groningen concluded that neither this study (M18.2334032, 24 July 2018) nor our larger study (M16.192386, 10 May 2016) fall within the scope of the Dutch Medical Research Involving Human Subjects Act.

## ACKNOWLEDGEMENTS

We thank all the participants in the original interview study and our co-researcher participants in this project. Because this is a meta-analysis of the PPI project, we decided not to invite the co-researchers as co-author of this article. We thank Laura Postma for helping to facilitate the group meetings.

## FUNDING STATEMENT

The PPI study itself was a low-cost project. Data collection for the main interview study was funded by the University of Groningen as part of the MD/PhD program of Malou Luchtenberg. This funding body has no role in the design of the study and collection, analysis, or interpretation of data, or in writing the manuscript.

## COMPETING INTERESTS STATEMENT

None declared.

## DATA SHARING STATEMENT

The original dataset with audiotaped and videotaped interviews is not available for the public on account of privacy concerns.

## AUTHOR'S CONTRIBUTION

ML, EM and EV designed the original study. ML was responsible for the data collection in Phase 1 and the group meetings were led by ML (PPIA1). Analysis was performed by ML, checked by EM, and discussed with EV. ML made the first draft of the article, which was subsequently discussed within the team and reviewed by EM and EV. All authors read and approved the final manuscript.

## REFERENCES

1. Hennink M, Hutter I, Bailey A. The nature of qualitative research. Subjectivity and the need for reflexivity. In: *Qualitative Research Methods*. London: Sage 2011:19-23.
2. Taylor RM, Whelan JS, Gibson F, et al. Involving young people in BRIGHTLIGHT from study inception to secondary data analysis: insights from 10 years of user involvement. *Res Involv Engagem* 2018;4(1):1–14. <https://doi.org/10.1186/s40900-018-0135-x>
3. Jamal F, Langford R, Daniels P, et al. Consulting with young people to inform systematic reviews: an example from a review on the effects of schools on health. *Heal Expect* 2015;18(6):3225–35. <https://doi.org/10.1111/hex.12312>
4. Coad J, Evans R. Reflections on practical approaches to involving children and young people in the data analysis process. *Child Soc* 2008 Jan;22(1):41–52. <https://doi.org/10.1111/j.1099-0860.2006.00062.x>
5. Clavering EK, McLaughlin J. Children’s participation in health research: from objects to agents? *Child Care Health Dev* 2010;36(5):603–11. <https://doi.org/10.1111/j.1365-2214.2010.01094.x>
6. Brady L-M, Preston J. Evaluating the extent and impact of young people’s involvement in National Institute for Health Research (NIHR) studies: an assessment of feasibility. 2017 April. [http://www.invo.org.uk/wp-content/uploads/2017/06/Impact-of-CYPs-involvement\\_JLI\\_GenR.pdf](http://www.invo.org.uk/wp-content/uploads/2017/06/Impact-of-CYPs-involvement_JLI_GenR.pdf) (accessed 01-07-2019)
7. Lundy L, McEvoy L, Byrne B. Working with young children as co-researchers: an approach informed by the United Nations Convention on the Rights of the Child. *Early Educ Dev* 2011;22(5):714–36. <https://doi.org/10.1080/10409289.2011.596463>
8. Holland S, Renold E, Ross NJ, et al. Power, agency and participatory agendas: a critical exploration of young people’s engagement in participative qualitative research. *Childhood* 2010;17(3):360–75. <https://doi.org/10.1177/0907568210369310>
9. Locock L, Kirkpatrick S, Brading L, et al. Involving service users in the qualitative analysis of patient narratives to support healthcare quality improvement. *Res Involv Engagem* 2019;5(1):1–11. <https://doi.org/10.1186/s40900-018-0133-z>
10. INVOLVE. What is public involvement in research? *NHS Natl Inst Heal Res* 2015. <http://www.invo.org.uk/find-out-more/what-is-public-involvement-in-research-2/> (accessed 10-07-2019)
11. Bird D, Culley L, Lakhanpaul M. Why collaborate with children in health research: an analysis of the risks and benefits of collaboration with children. *Arch Dis Child - Educ Pract Ed* 2013;98(2):42–8. <https://doi.org/10.1136/archdischild-2012-303470>
12. Preston J, Stones SR, Davies H, et al. How to involve children and young people in what is, after all, their research. *Arch Dis Child* 2019;104(5):494–500. <https://doi.org/10.1136/archdischild-2018-315118>
13. Sonpal K, Walker E, Swallow V, et al. Report on involving children and young people in research. Southampton: INVOLVE. 2019. <https://www.invo.org.uk/wp-content/uploads/2019/06/77620-YPv3-Booklet-WEB.pdf> (accessed 01-07-2019)
14. Blackburn S, McLachlan S, Jowett S, et al. The extent, quality and impact of patient and public involvement in primary care research: a mixed methods study. *Res Involv Engagem* 2018;4(1):1–18. <https://doi.org/10.1186/s40900-018-0100-8>
15. Domecq JP, Prutsky G, Elraiyah T, et al. Patient engagement in research: a systematic review. *BMC Heal Serv Res* 2014;14(89):1–9. <https://doi.org/10.1186/1472-6963-14-89>
16. Kellett M, Forrest R, Dent N, et al. “Just teach us the skills please, we’ll do the rest”: Empowering ten-year-olds as active researchers. *Child Soc* 2004;18(5):329–43. <https://doi.org/10.1002/chi.807>

17. Chappell P, Rule P, Dlamini M, et al. Troubling power dynamics: youth with disabilities as co-researchers in sexuality research in South Africa. *Childhood* 2014;21(3):385–99. <https://doi.org/10.1177/0907568214525427>
18. Dovey-Pearse G, Walker S, Fairgrieve S, et al. The burden of proof: The process of involving young people in research. *Health Expectations* 2019;22:465–474. <https://doi.org/10.1111/hex.12870>
19. Best P, Badham J, Corepal R, et al. Network methods to support user involvement in qualitative data analyses: an introduction to Participatory Theme Elicitation. *Trials* 2017;18(1):1–14. <https://doi.org/10.1186/s13063-017-2289-5>
20. Brederoschool. Academische Basisschool 2019. Groningen, the Netherlands. <https://brederoschool.openbaaronderwijsgroningen.nl/academischebasisschool/index.html> (accessed 09-11-2018)
21. Dutch Medical Research Involving Human Subjects Act (WMO), 26 February 1998. <https://wetten.overheid.nl/BWBR0009408/2019-04-02> (accessed 09-04-2019)
22. Cambridge University Press. Meaning of mind map in English. Cambridge Dictionary. 2019. <https://dictionary.cambridge.org/dictionary/english/mind-map> (accessed 19-09-2019)
23. Smith J, Firth J. Qualitative data analysis: the framework approach. *Nurse Researcher* 2011;18(2):52–62. <https://doi.org/10.7748/nr2011.01.18.2.52.c8284>
24. Coad J. Using art-based techniques in engaging children and young people in health care consultations and/or research. *J Res Nurs* 2007;12(5):487–97. <https://doi.org/10.1177/1744987107081250>
25. Darbyshire P, Macdougall C, Schiller W. Multiple methods in qualitative research with children: more insight or just more? *Qual Res* 2005;5(4):417–436. <https://doi.org/10.1177/1468794105056921>
26. Hewitt J. Ethical components of researcher-researched relationships in qualitative interviewing. *Qual Health Res* 2007;17(8):1149–59. <https://doi.org/10.1177/1049732307308305>
27. Alldred P, Gillies V. Eliciting research accounts: re/producing modern subjects. *Ethics in Qualitative Research*. London: Sage 2002:146–65.
28. Gaillard S, Malik S, Preston J, et al. Involving children and young people in clinical research through the forum of a European Young Persons' Advisory Group: needs and challenges. *Fundam Clin Pharmacol* 2018 Aug;32(4):357–62. <https://doi.org/10.1111/fcp.12360>
29. National Institute for Health Research. About INVOLVE. <https://www.invo.org.uk/about-involve/> (accessed 04-03-2020)
30. Garrison W, Felice ME. Adolescence. In: Carey WB, Crocker AC, Coleman WL, Elias ER, Feldman HM, eds. *Developmental-Behavioral Pediatrics (Fourth Edition)* 2009:62–73. <https://doi.org/https://doi.org/10.1016/B978-1-4160-3370-7.00006-7>
31. Christie D, Viner R. Adolescent development. *BMJ (Clinical Research Ed.)* 2005;330:301. <https://doi.org/10.1136/bmj.330.7486.301>
